# Supplementary material for: Formation of autotriploid Carassius auratus and its fertility-related genes analysis
Source: Research Square preprint supplement (doi:10.21203/rs.3.rs-397574/v1), 2021-04-13
Supplement: Supplementary file 4 [file 66786d8796af0677eb97f2b7.docx]

| Gene ID | Primer sequence |
| --- | --- |
| Caur.EVM.02475-RA-F | 5’-TGACATACAGTCGCAGAG |
| Caur.EVM.02475-RA-R | 5’-CAGATAAGTGGAGGTTGG |
| Caur.EVM.06470-RA-F | 5’-TCCTGCTCTGGAGATGAA |
| Caur.EVM.06470-RA-R | 5’-ATCCTGGCGTAGGTAAAG |
| Caur.EVM.06490-RA-F | 5’-TCGGAGGGAAATCTGAAC |
| Caur.EVM.06490-RA-R | 5’-TGTCTGCCCACAAACTGA |
| Caur.EVM.13321-RA-F | 5’-TATACCCACGCAGCAACT |
| Caur.EVM.13321-RA-R | 5’-CTTCATCCCATTCATTCG |
| Caur.EVM.13777-RA-F | 5’-ATGTACGGCTGTGATTGG |
| Caur.EVM.13777-RA-R | 5’-CTTCAGGCTGCTCTTTCC |
| Caur.EVM.14945-RA-F | 5’-AACTTCCTGGTTTCCCTA |
| Caur.EVM.14945-RA-R | 5’-CATCCTCCACTGCTCGTA |
| Caur.EVM.17139-RA-F | 5’-GGATTCGGCTCCGTCTTT |
| Caur.EVM.17139-RA-R | 5’-CCAGGGTCTCCGTGTTGA |
| Caur.EVM.17487-RA-F | 5’-AGAGGAGGATGGAGACGA |
| Caur.EVM.17487-RA-R | 5’-TTGAGCAGGCAGAAGAGT |
| Caur.EVM.22800-RA-F | 5’-GCGGAAACTCATCCCCACA |
| Caur.EVM.22800-RA-R | 5’-TCCAGCAGAGTCACCAAGA |
| Caur.EVM.24200-RA-F | 5’-GAGGGTGGTCTTGCTAAT |
| Caur.EVM.24200-RA-R | 5’-GACTTTGACAGGTGGAGG |
| Caur.EVM.24201-RA-F | 5’-CCTTCAATAAAGTCGTGGAT |
| Caur.EVM.24201-RA-R | 5’-AGCGGACTGAGCATTAGG |
| Caur.EVM.24801-RA-F | 5’-AATGGGATGCTCTGATAC |
| Caur.EVM.24801-RA-R | 5’-GTGACTCTGACAGGTGGA |
| Caur.EVM.26636-RA-F | 5’-CCCAGCAGTATGGTGTATC |
| Caur.EVM.26636-RA-R | 5’-GTTCAGAGGGTCTCGTTT |
| Caur.EVM.26856-RA-F | 5’-TCAATCTGCTGCTGTATCCG |
| Caur.EVM.26856-RA-R | 5’-TGCTGTGGTTTGCCTGTG |
| Caur.EVM.27390-RA-F | 5’-AAAGTCACGGGACATTCAC |
| Caur.EVM.27390-RA-R | 5’-ATTTCCTTTGGCTTCTGG |
| Caur.EVM.28970-RA-F | 5’-TTCAAGACAAGAACCACCAG |
| Caur.EVM.28970-RA-R | 5’-TCAAGGATGAGGCAAAGC |
| Caur.EVM.34073-RA-F | 5’-TGACAGCAGGAAGGAGCA |
| Caur.EVM.34073-RA-R | 5’-ACCAGGCCACGGTAGTTG |
| Caur.EVM.34835-RA-F | 5’-CATTGCCACCTCCTTGTT |
| Caur.EVM.34835-RA-R | 5’-GAATGCGACTTTGCTTGG |
| Caur.EVM.35979-RA-F | 5’-GGTGGAACTGGACTGGAA |
| Caur.EVM.35979-RA-R | 5’-TGGGTGGTCGTAGACTCAT |
| Caur.EVM.36741-RA-F | 5’-GACATCAGTCAGGGTTTG |
| Caur.EVM.36741-RA-R | 5’-TACATCATCCTTGCCACA |
| *β-actin*-F | 5’-GCCCTGCCCCATGCCATCCT |
| *β-actin*-R | 5’- AGTGCCCATCTCCTGCTCGA |

Additional file 8: Table S8. Sequences of primers used in this study.
