# Supplementary material for: Formation of autotriploid Carassius auratus and its fertility-related genes analysis
Source: Research Square preprint supplement (doi:10.21203/rs.3.rs-397574/v1), 2021-04-13
Supplement: Supplementary file 5 [file ba1cb7cfaf5108a9240df0d3.xlsx]

## Sheet: Sheet1
Additional file 3: Table S3. Gene classification based on gene ontology (GO) for DEGs in M3nRR vs M4nRR
	ONTOLOGY	ID	Description	pvalue	p.adjust	qvalue	geneID	Count
GO:0022622	BP	GO:0022622	root system development	3.64638e-20	5.10913e-17	5.03271e-17	Caur.EVM.17967-RA/Caur.EVM.14774-RA/Caur.EVM.04727-RA/Caur.EVM.06031-RA/Caur.EVM.10643-RA/Caur.EVM.32963-RA/Caur.EVM.17966-RA/Caur.EVM.29282-RA/Caur.EVM.16373-RA/Caur.EVM.03065-RA/Caur.EVM.02446-RA/Caur.EVM.05317-RA/Caur.EVM.06048-RA/Caur.EVM.16126-RA/Caur.EVM.14301-RA/Caur.EVM.08561-RA/Caur.EVM.17139-RA/Caur.EVM.07844-RA/Caur.EVM.22424-RA/Caur.EVM.14858-RA/Caur.EVM.03068-RA/Caur.EVM.13351-RA/Cau…	34
GO:0048364	BP	GO:0048364	root development	3.64638e-20	5.10913e-17	5.03271e-17	Caur.EVM.17967-RA/Caur.EVM.14774-RA/Caur.EVM.04727-RA/Caur.EVM.06031-RA/Caur.EVM.10643-RA/Caur.EVM.32963-RA/Caur.EVM.17966-RA/Caur.EVM.29282-RA/Caur.EVM.16373-RA/Caur.EVM.03065-RA/Caur.EVM.02446-RA/Caur.EVM.05317-RA/Caur.EVM.06048-RA/Caur.EVM.16126-RA/Caur.EVM.14301-RA/Caur.EVM.08561-RA/Caur.EVM.17139-RA/Caur.EVM.07844-RA/Caur.EVM.22424-RA/Caur.EVM.14858-RA/Caur.EVM.03068-RA/Caur.EVM.13351-RA/Cau…	34
GO:0099402	BP	GO:0099402	plant organ development	8.81137e-20	5.10913e-17	5.03271e-17	Caur.EVM.17967-RA/Caur.EVM.14774-RA/Caur.EVM.04727-RA/Caur.EVM.06031-RA/Caur.EVM.10643-RA/Caur.EVM.32963-RA/Caur.EVM.17966-RA/Caur.EVM.29282-RA/Caur.EVM.16373-RA/Caur.EVM.03065-RA/Caur.EVM.02446-RA/Caur.EVM.05317-RA/Caur.EVM.06048-RA/Caur.EVM.16126-RA/Caur.EVM.14301-RA/Caur.EVM.08561-RA/Caur.EVM.17139-RA/Caur.EVM.07844-RA/Caur.EVM.22424-RA/Caur.EVM.14858-RA/Caur.EVM.03068-RA/Caur.EVM.13351-RA/Cau…	34
GO:0048527	BP	GO:0048527	lateral root development	8.82661e-20	5.10913e-17	5.03271e-17	Caur.EVM.17967-RA/Caur.EVM.14774-RA/Caur.EVM.04727-RA/Caur.EVM.06031-RA/Caur.EVM.10643-RA/Caur.EVM.32963-RA/Caur.EVM.17966-RA/Caur.EVM.29282-RA/Caur.EVM.16373-RA/Caur.EVM.03065-RA/Caur.EVM.02446-RA/Caur.EVM.05317-RA/Caur.EVM.06048-RA/Caur.EVM.16126-RA/Caur.EVM.14301-RA/Caur.EVM.08561-RA/Caur.EVM.17139-RA/Caur.EVM.07844-RA/Caur.EVM.22424-RA/Caur.EVM.14858-RA/Caur.EVM.03068-RA/Caur.EVM.13351-RA/Cau…	33
GO:0048528	BP	GO:0048528	post-embryonic root development	8.82661e-20	5.10913e-17	5.03271e-17	Caur.EVM.17967-RA/Caur.EVM.14774-RA/Caur.EVM.04727-RA/Caur.EVM.06031-RA/Caur.EVM.10643-RA/Caur.EVM.32963-RA/Caur.EVM.17966-RA/Caur.EVM.29282-RA/Caur.EVM.16373-RA/Caur.EVM.03065-RA/Caur.EVM.02446-RA/Caur.EVM.05317-RA/Caur.EVM.06048-RA/Caur.EVM.16126-RA/Caur.EVM.14301-RA/Caur.EVM.08561-RA/Caur.EVM.17139-RA/Caur.EVM.07844-RA/Caur.EVM.22424-RA/Caur.EVM.14858-RA/Caur.EVM.03068-RA/Caur.EVM.13351-RA/Cau…	33
GO:0090696	BP	GO:0090696	post-embryonic plant organ development	8.82661e-20	5.10913e-17	5.03271e-17	Caur.EVM.17967-RA/Caur.EVM.14774-RA/Caur.EVM.04727-RA/Caur.EVM.06031-RA/Caur.EVM.10643-RA/Caur.EVM.32963-RA/Caur.EVM.17966-RA/Caur.EVM.29282-RA/Caur.EVM.16373-RA/Caur.EVM.03065-RA/Caur.EVM.02446-RA/Caur.EVM.05317-RA/Caur.EVM.06048-RA/Caur.EVM.16126-RA/Caur.EVM.14301-RA/Caur.EVM.08561-RA/Caur.EVM.17139-RA/Caur.EVM.07844-RA/Caur.EVM.22424-RA/Caur.EVM.14858-RA/Caur.EVM.03068-RA/Caur.EVM.13351-RA/Cau…	33
GO:0009651	BP	GO:0009651	response to salt stress	2.1623e-15	1.07281e-12	1.05676e-12	Caur.EVM.17967-RA/Caur.EVM.14774-RA/Caur.EVM.04727-RA/Caur.EVM.06031-RA/Caur.EVM.10643-RA/Caur.EVM.32963-RA/Caur.EVM.17966-RA/Caur.EVM.29282-RA/Caur.EVM.16373-RA/Caur.EVM.03065-RA/Caur.EVM.02446-RA/Caur.EVM.05317-RA/Caur.EVM.06048-RA/Caur.EVM.16126-RA/Caur.EVM.14301-RA/Caur.EVM.08561-RA/Caur.EVM.17139-RA/Caur.EVM.07844-RA/Caur.EVM.30208-RA/Caur.EVM.22424-RA/Caur.EVM.14858-RA/Caur.EVM.03068-RA/Cau…	36
GO:0006970	BP	GO:0006970	response to osmotic stress	1.76808e-13	7.67569e-11	7.56088e-11	Caur.EVM.17967-RA/Caur.EVM.14774-RA/Caur.EVM.04727-RA/Caur.EVM.06031-RA/Caur.EVM.10643-RA/Caur.EVM.32963-RA/Caur.EVM.17966-RA/Caur.EVM.29282-RA/Caur.EVM.16373-RA/Caur.EVM.15913-RA/Caur.EVM.03065-RA/Caur.EVM.02446-RA/Caur.EVM.05317-RA/Caur.EVM.06048-RA/Caur.EVM.16126-RA/Caur.EVM.26204-RA/Caur.EVM.14301-RA/Caur.EVM.08561-RA/Caur.EVM.17139-RA/Caur.EVM.07844-RA/Caur.EVM.30208-RA/Caur.EVM.22424-RA/Cau…	39
GO:0098542	BP	GO:0098542	defense response to other organism	2.98503e-06	0.00115189	0.00113466	Caur.EVM.35947-RA/Caur.EVM.22242-RA/Caur.EVM.04625-RA/Caur.EVM.30114-RA/Caur.EVM.09543-RA/Caur.EVM.32721-RA/Caur.EVM.30598-RA/Caur.EVM.22561-RA/Caur.EVM.34162-RA/Caur.EVM.01523-RA/Caur.EVM.08831-RA/Caur.EVM.01364-RA/Caur.EVM.39035-RA/Caur.EVM.35133-RA/Caur.EVM.34451-RA/Caur.EVM.03945-RA/Caur.EVM.34903-RA/Caur.EVM.30547-RA/Caur.EVM.38308-RA/Caur.EVM.03283-RA/Caur.EVM.32134-RA/Caur.EVM.29746-RA/Cau…	37
GO:0042742	BP	GO:0042742	defense response to bacterium	0.000180839	0.0623159	0.0613838	Caur.EVM.35947-RA/Caur.EVM.22242-RA/Caur.EVM.04625-RA/Caur.EVM.32721-RA/Caur.EVM.34162-RA/Caur.EVM.35133-RA/Caur.EVM.30547-RA/Caur.EVM.32134-RA/Caur.EVM.29746-RA/Caur.EVM.04137-RA/Caur.EVM.28009-RA/Caur.EVM.29510-RA/Caur.EVM.21868-RA/Caur.EVM.32138-RA/Caur.EVM.20423-RA/Caur.EVM.34428-RA/Caur.EVM.36804-RA/Caur.EVM.26479-RA/Caur.EVM.08133-RA/Caur.EVM.02254-RA	20
GO:0002040	BP	GO:0002040	sprouting angiogenesis	0.000197372	0.0623159	0.0613838	Caur.EVM.07527-RA/Caur.EVM.00189-RA/Caur.EVM.10992-RA/Caur.EVM.02598-RA/Caur.EVM.24636-RA/Caur.EVM.16485-RA/Caur.EVM.23311-RA/Caur.EVM.12009-RA/Caur.EVM.25437-RA/Caur.EVM.04654-RA/Caur.EVM.38156-RA/Caur.EVM.11577-RA/Caur.EVM.36026-RA/Caur.EVM.00891-RA/Caur.EVM.32719-RA/Caur.EVM.04146-RA/Caur.EVM.34474-RA/Caur.EVM.02489-RA/Caur.EVM.10135-RA/Caur.EVM.19788-RA/Caur.EVM.18979-RA/Caur.EVM.25903-RA	22
GO:0048569	BP	GO:0048569	post-embryonic animal organ development	0.000333669	0.0910642	0.0897021	Caur.EVM.17967-RA/Caur.EVM.14774-RA/Caur.EVM.04727-RA/Caur.EVM.06031-RA/Caur.EVM.10643-RA/Caur.EVM.32963-RA/Caur.EVM.17966-RA/Caur.EVM.29282-RA/Caur.EVM.12971-RA/Caur.EVM.16373-RA/Caur.EVM.03065-RA/Caur.EVM.02446-RA/Caur.EVM.05474-RA/Caur.EVM.05317-RA/Caur.EVM.01986-RA/Caur.EVM.06048-RA/Caur.EVM.16126-RA/Caur.EVM.14301-RA/Caur.EVM.33001-RA/Caur.EVM.08561-RA/Caur.EVM.17139-RA/Caur.EVM.07844-RA/Cau…	59
GO:0043207	BP	GO:0043207	response to external biotic stimulus	0.000367089	0.0910642	0.0897021	Caur.EVM.35947-RA/Caur.EVM.22242-RA/Caur.EVM.04625-RA/Caur.EVM.30114-RA/Caur.EVM.23835-RA/Caur.EVM.18934-RA/Caur.EVM.01025-RA/Caur.EVM.09543-RA/Caur.EVM.32721-RA/Caur.EVM.30598-RA/Caur.EVM.22561-RA/Caur.EVM.34162-RA/Caur.EVM.01523-RA/Caur.EVM.08831-RA/Caur.EVM.01364-RA/Caur.EVM.16485-RA/Caur.EVM.37046-RA/Caur.EVM.39035-RA/Caur.EVM.35863-RA/Caur.EVM.35133-RA/Caur.EVM.12009-RA/Caur.EVM.34451-RA/Cau…	58
GO:0051707	BP	GO:0051707	response to other organism	0.000367089	0.0910642	0.0897021	Caur.EVM.35947-RA/Caur.EVM.22242-RA/Caur.EVM.04625-RA/Caur.EVM.30114-RA/Caur.EVM.23835-RA/Caur.EVM.18934-RA/Caur.EVM.01025-RA/Caur.EVM.09543-RA/Caur.EVM.32721-RA/Caur.EVM.30598-RA/Caur.EVM.22561-RA/Caur.EVM.34162-RA/Caur.EVM.01523-RA/Caur.EVM.08831-RA/Caur.EVM.01364-RA/Caur.EVM.16485-RA/Caur.EVM.37046-RA/Caur.EVM.39035-RA/Caur.EVM.35863-RA/Caur.EVM.35133-RA/Caur.EVM.12009-RA/Caur.EVM.34451-RA/Cau…	58
GO:0009607	BP	GO:0009607	response to biotic stimulus	0.000455933	0.0991679	0.0976846	Caur.EVM.35947-RA/Caur.EVM.22242-RA/Caur.EVM.04625-RA/Caur.EVM.30114-RA/Caur.EVM.23835-RA/Caur.EVM.18934-RA/Caur.EVM.01025-RA/Caur.EVM.09543-RA/Caur.EVM.32721-RA/Caur.EVM.30598-RA/Caur.EVM.22561-RA/Caur.EVM.34162-RA/Caur.EVM.01523-RA/Caur.EVM.29437-RA/Caur.EVM.08831-RA/Caur.EVM.01364-RA/Caur.EVM.16485-RA/Caur.EVM.37046-RA/Caur.EVM.39035-RA/Caur.EVM.35863-RA/Caur.EVM.35133-RA/Caur.EVM.12009-RA/Cau…	59
GO:0035914	BP	GO:0035914	skeletal muscle cell differentiation	0.000491291	0.0991679	0.0976846	Caur.EVM.16330-RA/Caur.EVM.02581-RA/Caur.EVM.30195-RA/Caur.EVM.22498-RA/Caur.EVM.18515-RA/Caur.EVM.38211-RA/Caur.EVM.26047-RA/Caur.EVM.27368-RA/Caur.EVM.19070-RA/Caur.EVM.34355-RA/Caur.EVM.18511-RA/Caur.EVM.39173-RA/Caur.EVM.20559-RA/Caur.EVM.07993-RA/Caur.EVM.08576-RA	15
GO:0009617	BP	GO:0009617	response to bacterium	0.000510854	0.0991679	0.0976846	Caur.EVM.35947-RA/Caur.EVM.22242-RA/Caur.EVM.04625-RA/Caur.EVM.30114-RA/Caur.EVM.23835-RA/Caur.EVM.18934-RA/Caur.EVM.01025-RA/Caur.EVM.09543-RA/Caur.EVM.32721-RA/Caur.EVM.30598-RA/Caur.EVM.22561-RA/Caur.EVM.34162-RA/Caur.EVM.01523-RA/Caur.EVM.16485-RA/Caur.EVM.37046-RA/Caur.EVM.35863-RA/Caur.EVM.35133-RA/Caur.EVM.12009-RA/Caur.EVM.30547-RA/Caur.EVM.38308-RA/Caur.EVM.34555-RA/Caur.EVM.32134-RA/Cau…	40
GO:0051345	BP	GO:0051345	positive regulation of hydrolase activity	0.000513971	0.0991679	0.0976846	Caur.EVM.35947-RA/Caur.EVM.24740-RA/Caur.EVM.37500-RA/Caur.EVM.03722-RA/Caur.EVM.30114-RA/Caur.EVM.09543-RA/Caur.EVM.15994-RA/Caur.EVM.32721-RA/Caur.EVM.30598-RA/Caur.EVM.15911-RA/Caur.EVM.02100-RA/Caur.EVM.22561-RA/Caur.EVM.36741-RA/Caur.EVM.01523-RA/Caur.EVM.02252-RA/Caur.EVM.39129-RA/Caur.EVM.39035-RA/Caur.EVM.30195-RA/Caur.EVM.19674-RA/Caur.EVM.38308-RA/Caur.EVM.34661-RA/Caur.EVM.19867-RA/Cau…	51
GO:0043534	BP	GO:0043534	blood vessel endothelial cell migration	0.00057669	0.105413	0.103836	Caur.EVM.33845-RA/Caur.EVM.01024-RA/Caur.EVM.05206-RA/Caur.EVM.33001-RA/Caur.EVM.26779-RA/Caur.EVM.16485-RA/Caur.EVM.12009-RA/Caur.EVM.11577-RA/Caur.EVM.23836-RA/Caur.EVM.37499-RA/Caur.EVM.06565-RA/Caur.EVM.10135-RA/Caur.EVM.25903-RA	13
GO:0030199	BP	GO:0030199	collagen fibril organization	0.00061126	0.106145	0.104558	Caur.EVM.35279-RA/Caur.EVM.02455-RA/Caur.EVM.32506-RA/Caur.EVM.00189-RA/Caur.EVM.10992-RA/Caur.EVM.06713-RA/Caur.EVM.08108-RA/Caur.EVM.04744-RA/Caur.EVM.25437-RA/Caur.EVM.15058-RA/Caur.EVM.28344-RA/Caur.EVM.37499-RA/Caur.EVM.26403-RA/Caur.EVM.24708-RA/Caur.EVM.33747-RA	15
GO:0010035	BP	GO:0010035	response to inorganic substance	0.000737663	0.121995	0.120171	Caur.EVM.16687-RA/Caur.EVM.35279-RA/Caur.EVM.24740-RA/Caur.EVM.17428-RA/Caur.EVM.15363-RA/Caur.EVM.30002-RA/Caur.EVM.02455-RA/Caur.EVM.31278-RA/Caur.EVM.29574-RA/Caur.EVM.15913-RA/Caur.EVM.38395-RA/Caur.EVM.26050-RA/Caur.EVM.30208-RA/Caur.EVM.17245-RA/Caur.EVM.10070-RA/Caur.EVM.17244-RA/Caur.EVM.14226-RA/Caur.EVM.35863-RA/Caur.EVM.14703-RA/Caur.EVM.03945-RA/Caur.EVM.17863-RA/Caur.EVM.09856-RA/Cau…	38
GO:0006952	BP	GO:0006952	defense response	0.000867071	0.136879	0.134832	Caur.EVM.35947-RA/Caur.EVM.11677-RA/Caur.EVM.00478-RA/Caur.EVM.22242-RA/Caur.EVM.04625-RA/Caur.EVM.30114-RA/Caur.EVM.09543-RA/Caur.EVM.32721-RA/Caur.EVM.30598-RA/Caur.EVM.21499-RA/Caur.EVM.01902-RA/Caur.EVM.14666-RA/Caur.EVM.22561-RA/Caur.EVM.10641-RA/Caur.EVM.34162-RA/Caur.EVM.01523-RA/Caur.EVM.29437-RA/Caur.EVM.14870-RA/Caur.EVM.08831-RA/Caur.EVM.01364-RA/Caur.EVM.24931-RA/Caur.EVM.39035-RA/Cau…	75
GO:0048144	BP	GO:0048144	fibroblast proliferation	0.000975995	0.141235	0.139122	Caur.EVM.30208-RA/Caur.EVM.06644-RA/Caur.EVM.23139-RA/Caur.EVM.09583-RA/Caur.EVM.37499-RA/Caur.EVM.26600-RA	6
GO:0048145	BP	GO:0048145	regulation of fibroblast proliferation	0.000975995	0.141235	0.139122	Caur.EVM.30208-RA/Caur.EVM.06644-RA/Caur.EVM.23139-RA/Caur.EVM.09583-RA/Caur.EVM.37499-RA/Caur.EVM.26600-RA	6
GO:0030198	BP	GO:0030198	extracellular matrix organization	0.00118008	0.163936	0.161484	Caur.EVM.33099-RA/Caur.EVM.35279-RA/Caur.EVM.22242-RA/Caur.EVM.02455-RA/Caur.EVM.32506-RA/Caur.EVM.00189-RA/Caur.EVM.10992-RA/Caur.EVM.06713-RA/Caur.EVM.03509-RA/Caur.EVM.08108-RA/Caur.EVM.30195-RA/Caur.EVM.04744-RA/Caur.EVM.25437-RA/Caur.EVM.31951-RA/Caur.EVM.02633-RA/Caur.EVM.04654-RA/Caur.EVM.23824-RA/Caur.EVM.15058-RA/Caur.EVM.28344-RA/Caur.EVM.37499-RA/Caur.EVM.26403-RA/Caur.EVM.04745-RA/Cau…	31
GO:1903531	BP	GO:1903531	negative regulation of secretion by cell	0.00198098	0.258411	0.254546	Caur.EVM.01630-RA/Caur.EVM.24740-RA/Caur.EVM.28051-RA/Caur.EVM.09543-RA/Caur.EVM.30598-RA/Caur.EVM.22561-RA/Caur.EVM.13460-RA/Caur.EVM.01523-RA/Caur.EVM.11842-RA/Caur.EVM.00266-RA/Caur.EVM.38308-RA/Caur.EVM.28532-RA/Caur.EVM.37499-RA/Caur.EVM.22263-RA/Caur.EVM.38397-RA	15
GO:0043542	BP	GO:0043542	endothelial cell migration	0.00200895	0.258411	0.254546	Caur.EVM.33845-RA/Caur.EVM.01024-RA/Caur.EVM.05206-RA/Caur.EVM.00189-RA/Caur.EVM.33001-RA/Caur.EVM.10992-RA/Caur.EVM.26779-RA/Caur.EVM.16485-RA/Caur.EVM.12009-RA/Caur.EVM.25437-RA/Caur.EVM.11577-RA/Caur.EVM.23836-RA/Caur.EVM.37499-RA/Caur.EVM.06565-RA/Caur.EVM.10135-RA/Caur.EVM.25903-RA	16
GO:0009615	BP	GO:0009615	response to virus	0.00265448	0.32925	0.324325	Caur.EVM.30114-RA/Caur.EVM.09543-RA/Caur.EVM.30598-RA/Caur.EVM.22561-RA/Caur.EVM.01523-RA/Caur.EVM.01364-RA/Caur.EVM.03945-RA/Caur.EVM.01250-RA/Caur.EVM.38308-RA/Caur.EVM.10059-RA/Caur.EVM.03283-RA/Caur.EVM.38211-RA/Caur.EVM.29746-RA/Caur.EVM.31294-RA/Caur.EVM.29510-RA/Caur.EVM.34355-RA/Caur.EVM.28064-RA/Caur.EVM.30419-RA/Caur.EVM.36570-RA/Caur.EVM.08351-RA/Caur.EVM.08576-RA	21
GO:0010038	BP	GO:0010038	response to metal ion	0.00382492	0.378457	0.372796	Caur.EVM.16687-RA/Caur.EVM.24740-RA/Caur.EVM.15363-RA/Caur.EVM.30002-RA/Caur.EVM.31278-RA/Caur.EVM.29574-RA/Caur.EVM.15913-RA/Caur.EVM.38395-RA/Caur.EVM.30208-RA/Caur.EVM.17245-RA/Caur.EVM.10070-RA/Caur.EVM.17244-RA/Caur.EVM.14703-RA/Caur.EVM.17863-RA/Caur.EVM.09856-RA/Caur.EVM.19590-RA/Caur.EVM.38542-RA/Caur.EVM.20470-RA/Caur.EVM.33181-RA/Caur.EVM.04467-RA/Caur.EVM.34355-RA/Caur.EVM.27448-RA/Cau…	28
GO:0002252	BP	GO:0002252	immune effector process	0.00384183	0.378457	0.372796	Caur.EVM.16687-RA/Caur.EVM.22242-RA/Caur.EVM.04625-RA/Caur.EVM.30114-RA/Caur.EVM.09543-RA/Caur.EVM.30598-RA/Caur.EVM.22561-RA/Caur.EVM.13460-RA/Caur.EVM.34162-RA/Caur.EVM.01523-RA/Caur.EVM.29437-RA/Caur.EVM.08831-RA/Caur.EVM.01364-RA/Caur.EVM.04189-RA/Caur.EVM.03945-RA/Caur.EVM.19780-RA/Caur.EVM.30547-RA/Caur.EVM.38308-RA/Caur.EVM.10985-RA/Caur.EVM.03283-RA/Caur.EVM.38991-RA/Caur.EVM.29746-RA/Cau…	34
GO:0046686	BP	GO:0046686	response to cadmium ion	0.00388811	0.378457	0.372796	Caur.EVM.16687-RA/Caur.EVM.30002-RA/Caur.EVM.29574-RA/Caur.EVM.38395-RA/Caur.EVM.17245-RA/Caur.EVM.17244-RA/Caur.EVM.14703-RA/Caur.EVM.38542-RA/Caur.EVM.27448-RA/Caur.EVM.05892-RA	10
GO:0051048	BP	GO:0051048	negative regulation of secretion	0.00441193	0.378457	0.372796	Caur.EVM.01630-RA/Caur.EVM.24740-RA/Caur.EVM.28051-RA/Caur.EVM.09543-RA/Caur.EVM.30598-RA/Caur.EVM.22561-RA/Caur.EVM.13460-RA/Caur.EVM.01523-RA/Caur.EVM.11842-RA/Caur.EVM.00266-RA/Caur.EVM.08944-RA/Caur.EVM.38308-RA/Caur.EVM.28532-RA/Caur.EVM.37499-RA/Caur.EVM.22263-RA/Caur.EVM.38397-RA	16
GO:0031953	BP	GO:0031953	negative regulation of protein autophosphorylation	0.00446781	0.378457	0.372796	Caur.EVM.09543-RA/Caur.EVM.30598-RA/Caur.EVM.22561-RA/Caur.EVM.01523-RA/Caur.EVM.38308-RA	5
GO:0032621	BP	GO:0032621	interleukin-18 production	0.00446781	0.378457	0.372796	Caur.EVM.09543-RA/Caur.EVM.30598-RA/Caur.EVM.22561-RA/Caur.EVM.01523-RA/Caur.EVM.38308-RA	5
GO:0032661	BP	GO:0032661	regulation of interleukin-18 production	0.00446781	0.378457	0.372796	Caur.EVM.09543-RA/Caur.EVM.30598-RA/Caur.EVM.22561-RA/Caur.EVM.01523-RA/Caur.EVM.38308-RA	5
GO:0032691	BP	GO:0032691	negative regulation of interleukin-1 beta production	0.00446781	0.378457	0.372796	Caur.EVM.09543-RA/Caur.EVM.30598-RA/Caur.EVM.22561-RA/Caur.EVM.01523-RA/Caur.EVM.38308-RA	5
GO:0032692	BP	GO:0032692	negative regulation of interleukin-1 production	0.00446781	0.378457	0.372796	Caur.EVM.09543-RA/Caur.EVM.30598-RA/Caur.EVM.22561-RA/Caur.EVM.01523-RA/Caur.EVM.38308-RA	5
GO:0042241	BP	GO:0042241	interleukin-18 biosynthetic process	0.00446781	0.378457	0.372796	Caur.EVM.09543-RA/Caur.EVM.30598-RA/Caur.EVM.22561-RA/Caur.EVM.01523-RA/Caur.EVM.38308-RA	5
GO:0045381	BP	GO:0045381	regulation of interleukin-18 biosynthetic process	0.00446781	0.378457	0.372796	Caur.EVM.09543-RA/Caur.EVM.30598-RA/Caur.EVM.22561-RA/Caur.EVM.01523-RA/Caur.EVM.38308-RA	5
GO:0050711	BP	GO:0050711	negative regulation of interleukin-1 secretion	0.00446781	0.378457	0.372796	Caur.EVM.09543-RA/Caur.EVM.30598-RA/Caur.EVM.22561-RA/Caur.EVM.01523-RA/Caur.EVM.38308-RA	5
GO:0050713	BP	GO:0050713	negative regulation of interleukin-1 beta secretion	0.00446781	0.378457	0.372796	Caur.EVM.09543-RA/Caur.EVM.30598-RA/Caur.EVM.22561-RA/Caur.EVM.01523-RA/Caur.EVM.38308-RA	5
GO:0043062	BP	GO:0043062	extracellular structure organization	0.00465513	0.384935	0.379178	Caur.EVM.33099-RA/Caur.EVM.35279-RA/Caur.EVM.22242-RA/Caur.EVM.02455-RA/Caur.EVM.32506-RA/Caur.EVM.00189-RA/Caur.EVM.10992-RA/Caur.EVM.06713-RA/Caur.EVM.03509-RA/Caur.EVM.08108-RA/Caur.EVM.30195-RA/Caur.EVM.04744-RA/Caur.EVM.25437-RA/Caur.EVM.31951-RA/Caur.EVM.02633-RA/Caur.EVM.04654-RA/Caur.EVM.23824-RA/Caur.EVM.15058-RA/Caur.EVM.28344-RA/Caur.EVM.37499-RA/Caur.EVM.26403-RA/Caur.EVM.04745-RA/Cau…	31
GO:0050663	BP	GO:0050663	cytokine secretion	0.00563227	0.444771	0.438118	Caur.EVM.35947-RA/Caur.EVM.09543-RA/Caur.EVM.32721-RA/Caur.EVM.30598-RA/Caur.EVM.01902-RA/Caur.EVM.22561-RA/Caur.EVM.13460-RA/Caur.EVM.10641-RA/Caur.EVM.01523-RA/Caur.EVM.23664-RA/Caur.EVM.38308-RA/Caur.EVM.32726-RA/Caur.EVM.04137-RA/Caur.EVM.21878-RA/Caur.EVM.28532-RA/Caur.EVM.23529-RA/Caur.EVM.28440-RA/Caur.EVM.36804-RA/Caur.EVM.12566-RA	19
GO:0008592	BP	GO:0008592	regulation of Toll signaling pathway	0.00570852	0.444771	0.438118	Caur.EVM.09543-RA/Caur.EVM.30598-RA/Caur.EVM.22561-RA/Caur.EVM.01523-RA/Caur.EVM.38308-RA/Caur.EVM.34428-RA	6
GO:0007519	BP	GO:0007519	skeletal muscle tissue development	0.00576294	0.444771	0.438118	Caur.EVM.01986-RA/Caur.EVM.10978-RA/Caur.EVM.16330-RA/Caur.EVM.05206-RA/Caur.EVM.00531-RA/Caur.EVM.10070-RA/Caur.EVM.01567-RA/Caur.EVM.02581-RA/Caur.EVM.30195-RA/Caur.EVM.05194-RA/Caur.EVM.34451-RA/Caur.EVM.03945-RA/Caur.EVM.06422-RA/Caur.EVM.19780-RA/Caur.EVM.03862-RA/Caur.EVM.23824-RA/Caur.EVM.17863-RA/Caur.EVM.22498-RA/Caur.EVM.09856-RA/Caur.EVM.18515-RA/Caur.EVM.38211-RA/Caur.EVM.30995-RA/Cau…	44
GO:0001525	BP	GO:0001525	angiogenesis	0.00607613	0.458748	0.451886	Caur.EVM.33845-RA/Caur.EVM.17428-RA/Caur.EVM.07527-RA/Caur.EVM.29488-RA/Caur.EVM.35322-RA/Caur.EVM.05206-RA/Caur.EVM.00189-RA/Caur.EVM.33001-RA/Caur.EVM.10992-RA/Caur.EVM.02598-RA/Caur.EVM.26779-RA/Caur.EVM.30208-RA/Caur.EVM.36361-RA/Caur.EVM.24636-RA/Caur.EVM.16485-RA/Caur.EVM.23311-RA/Caur.EVM.12009-RA/Caur.EVM.13653-RA/Caur.EVM.28801-RA/Caur.EVM.25437-RA/Caur.EVM.14218-RA/Caur.EVM.04654-RA/Cau…	54
GO:0003231	BP	GO:0003231	cardiac ventricle development	0.00633744	0.468297	0.461292	Caur.EVM.17428-RA/Caur.EVM.15363-RA/Caur.EVM.15913-RA/Caur.EVM.06713-RA/Caur.EVM.02581-RA/Caur.EVM.08902-RA/Caur.EVM.22498-RA/Caur.EVM.02479-RA/Caur.EVM.34355-RA/Caur.EVM.24708-RA/Caur.EVM.20828-RA	11
GO:0002360	BP	GO:0002360	T cell lineage commitment	0.00678893	0.489548	0.482225	Caur.EVM.01902-RA/Caur.EVM.10641-RA/Caur.EVM.08831-RA/Caur.EVM.23664-RA/Caur.EVM.03945-RA/Caur.EVM.32726-RA/Caur.EVM.21878-RA/Caur.EVM.23529-RA/Caur.EVM.28440-RA	9
GO:0002674	BP	GO:0002674	negative regulation of acute inflammatory response	0.00696197	0.489548	0.482225	Caur.EVM.09543-RA/Caur.EVM.30598-RA/Caur.EVM.22561-RA/Caur.EVM.01523-RA/Caur.EVM.38308-RA	5
GO:0007517	BP	GO:0007517	muscle organ development	0.00704791	0.489548	0.482225	Caur.EVM.17428-RA/Caur.EVM.12971-RA/Caur.EVM.15913-RA/Caur.EVM.01986-RA/Caur.EVM.10978-RA/Caur.EVM.16330-RA/Caur.EVM.05206-RA/Caur.EVM.06713-RA/Caur.EVM.00531-RA/Caur.EVM.10070-RA/Caur.EVM.01567-RA/Caur.EVM.02581-RA/Caur.EVM.30195-RA/Caur.EVM.05194-RA/Caur.EVM.34451-RA/Caur.EVM.04744-RA/Caur.EVM.03945-RA/Caur.EVM.06422-RA/Caur.EVM.19780-RA/Caur.EVM.37985-RA/Caur.EVM.03862-RA/Caur.EVM.23824-RA/Cau…	62
GO:0051607	BP	GO:0051607	defense response to virus	0.007566	0.51518	0.507474	Caur.EVM.30114-RA/Caur.EVM.09543-RA/Caur.EVM.30598-RA/Caur.EVM.22561-RA/Caur.EVM.01523-RA/Caur.EVM.01364-RA/Caur.EVM.38308-RA/Caur.EVM.03283-RA/Caur.EVM.29746-RA/Caur.EVM.29510-RA/Caur.EVM.36570-RA/Caur.EVM.08351-RA/Caur.EVM.08576-RA	13
GO:0002673	BP	GO:0002673	regulation of acute inflammatory response	0.00801028	0.51518	0.507474	Caur.EVM.09543-RA/Caur.EVM.30598-RA/Caur.EVM.22561-RA/Caur.EVM.01523-RA/Caur.EVM.30547-RA/Caur.EVM.38308-RA/Caur.EVM.02254-RA	7
GO:0030325	BP	GO:0030325	adrenal gland development	0.00801028	0.51518	0.507474	Caur.EVM.33564-RA/Caur.EVM.15994-RA/Caur.EVM.01167-RA/Caur.EVM.02581-RA/Caur.EVM.02290-RA/Caur.EVM.22498-RA/Caur.EVM.37499-RA	7
GO:0097366	BP	GO:0097366	response to bronchodilator	0.00801028	0.51518	0.507474	Caur.EVM.17428-RA/Caur.EVM.01683-RA/Caur.EVM.30208-RA/Caur.EVM.14226-RA/Caur.EVM.38991-RA/Caur.EVM.30995-RA/Caur.EVM.14685-RA	7
GO:0006955	BP	GO:0006955	immune response	0.0086953	0.544187	0.536048	Caur.EVM.00445-RA/Caur.EVM.35947-RA/Caur.EVM.16687-RA/Caur.EVM.22242-RA/Caur.EVM.30114-RA/Caur.EVM.09543-RA/Caur.EVM.32721-RA/Caur.EVM.30598-RA/Caur.EVM.32506-RA/Caur.EVM.11377-RA/Caur.EVM.22561-RA/Caur.EVM.13460-RA/Caur.EVM.01523-RA/Caur.EVM.29437-RA/Caur.EVM.05826-RA/Caur.EVM.08831-RA/Caur.EVM.23589-RA/Caur.EVM.01364-RA/Caur.EVM.34451-RA/Caur.EVM.04189-RA/Caur.EVM.03296-RA/Caur.EVM.03945-RA/Cau…	62
GO:0048645	BP	GO:0048645	animal organ formation	0.00877469	0.544187	0.536048	Caur.EVM.23456-RA/Caur.EVM.16330-RA/Caur.EVM.30091-RA/Caur.EVM.10437-RA/Caur.EVM.02581-RA/Caur.EVM.30195-RA/Caur.EVM.34451-RA/Caur.EVM.32869-RA/Caur.EVM.05257-RA/Caur.EVM.22498-RA/Caur.EVM.18515-RA/Caur.EVM.16794-RA/Caur.EVM.34474-RA/Caur.EVM.34355-RA/Caur.EVM.20828-RA/Caur.EVM.36248-RA	16
GO:0046474	BP	GO:0046474	glycerophospholipid biosynthetic process	0.00909172	0.54784	0.539646	Caur.EVM.30114-RA/Caur.EVM.30810-RA/Caur.EVM.28386-RA/Caur.EVM.22692-RA/Caur.EVM.19867-RA/Caur.EVM.33866-RA/Caur.EVM.06644-RA/Caur.EVM.39019-RA/Caur.EVM.21646-RA/Caur.EVM.27880-RA/Caur.EVM.15945-RA	11
GO:0050707	BP	GO:0050707	regulation of cytokine secretion	0.00930636	0.54784	0.539646	Caur.EVM.09543-RA/Caur.EVM.30598-RA/Caur.EVM.01902-RA/Caur.EVM.22561-RA/Caur.EVM.13460-RA/Caur.EVM.10641-RA/Caur.EVM.01523-RA/Caur.EVM.23664-RA/Caur.EVM.38308-RA/Caur.EVM.32726-RA/Caur.EVM.21878-RA/Caur.EVM.28532-RA/Caur.EVM.23529-RA/Caur.EVM.28440-RA/Caur.EVM.12566-RA	15
GO:0008016	BP	GO:0008016	regulation of heart contraction	0.00930682	0.54784	0.539646	Caur.EVM.01682-RA/Caur.EVM.15363-RA/Caur.EVM.01300-RA/Caur.EVM.15913-RA/Caur.EVM.31891-RA/Caur.EVM.24636-RA/Caur.EVM.20340-RA/Caur.EVM.33295-RA/Caur.EVM.24820-RA/Caur.EVM.38768-RA/Caur.EVM.34474-RA/Caur.EVM.18511-RA/Caur.EVM.22825-RA/Caur.EVM.16378-RA/Caur.EVM.20559-RA/Caur.EVM.01274-RA/Caur.EVM.19788-RA	17
GO:0060538	BP	GO:0060538	skeletal muscle organ development	0.00964871	0.557145	0.548812	Caur.EVM.01986-RA/Caur.EVM.10978-RA/Caur.EVM.16330-RA/Caur.EVM.05206-RA/Caur.EVM.00531-RA/Caur.EVM.10070-RA/Caur.EVM.01567-RA/Caur.EVM.02581-RA/Caur.EVM.30195-RA/Caur.EVM.05194-RA/Caur.EVM.34451-RA/Caur.EVM.03945-RA/Caur.EVM.06422-RA/Caur.EVM.19780-RA/Caur.EVM.03862-RA/Caur.EVM.23824-RA/Caur.EVM.17863-RA/Caur.EVM.22498-RA/Caur.EVM.09856-RA/Caur.EVM.18515-RA/Caur.EVM.38211-RA/Caur.EVM.30995-RA/Cau…	46
GO:0045751	BP	GO:0045751	negative regulation of Toll signaling pathway	0.0102868	0.557145	0.548812	Caur.EVM.09543-RA/Caur.EVM.30598-RA/Caur.EVM.22561-RA/Caur.EVM.01523-RA/Caur.EVM.38308-RA	5
GO:0003156	BP	GO:0003156	regulation of animal organ formation	0.0104274	0.557145	0.548812	Caur.EVM.02581-RA/Caur.EVM.30195-RA/Caur.EVM.34451-RA/Caur.EVM.32869-RA/Caur.EVM.05257-RA/Caur.EVM.22498-RA/Caur.EVM.36248-RA	7
GO:0032635	BP	GO:0032635	interleukin-6 production	0.0104274	0.557145	0.548812	Caur.EVM.09543-RA/Caur.EVM.30598-RA/Caur.EVM.22561-RA/Caur.EVM.01523-RA/Caur.EVM.30547-RA/Caur.EVM.38308-RA/Caur.EVM.02254-RA	7
GO:0032675	BP	GO:0032675	regulation of interleukin-6 production	0.0104274	0.557145	0.548812	Caur.EVM.09543-RA/Caur.EVM.30598-RA/Caur.EVM.22561-RA/Caur.EVM.01523-RA/Caur.EVM.30547-RA/Caur.EVM.38308-RA/Caur.EVM.02254-RA	7
GO:0043500	BP	GO:0043500	muscle adaptation	0.0104274	0.557145	0.548812	Caur.EVM.15363-RA/Caur.EVM.00531-RA/Caur.EVM.10070-RA/Caur.EVM.04744-RA/Caur.EVM.17863-RA/Caur.EVM.09856-RA/Caur.EVM.34355-RA	7
GO:0048844	BP	GO:0048844	artery morphogenesis	0.011252	0.592093	0.583237	Caur.EVM.06713-RA/Caur.EVM.36361-RA/Caur.EVM.02581-RA/Caur.EVM.38361-RA/Caur.EVM.14218-RA/Caur.EVM.22498-RA/Caur.EVM.00891-RA/Caur.EVM.02479-RA/Caur.EVM.27073-RA/Caur.EVM.34474-RA/Caur.EVM.37499-RA/Caur.EVM.11769-RA/Caur.EVM.19788-RA/Caur.EVM.36248-RA	14
GO:0051051	BP	GO:0051051	negative regulation of transport	0.0116251	0.602596	0.593583	Caur.EVM.01630-RA/Caur.EVM.24740-RA/Caur.EVM.28051-RA/Caur.EVM.00478-RA/Caur.EVM.09543-RA/Caur.EVM.30598-RA/Caur.EVM.22561-RA/Caur.EVM.03800-RA/Caur.EVM.13460-RA/Caur.EVM.01523-RA/Caur.EVM.11842-RA/Caur.EVM.00266-RA/Caur.EVM.08944-RA/Caur.EVM.15988-RA/Caur.EVM.38308-RA/Caur.EVM.35610-RA/Caur.EVM.38768-RA/Caur.EVM.28532-RA/Caur.EVM.04467-RA/Caur.EVM.37499-RA/Caur.EVM.01088-RA/Caur.EVM.22263-RA/Cau…	25
GO:0031349	BP	GO:0031349	positive regulation of defense response	0.0124812	0.634028	0.624545	Caur.EVM.35947-RA/Caur.EVM.30114-RA/Caur.EVM.09543-RA/Caur.EVM.32721-RA/Caur.EVM.30598-RA/Caur.EVM.22561-RA/Caur.EVM.01523-RA/Caur.EVM.29437-RA/Caur.EVM.30547-RA/Caur.EVM.38308-RA/Caur.EVM.04137-RA/Caur.EVM.32138-RA/Caur.EVM.34355-RA/Caur.EVM.20423-RA/Caur.EVM.36804-RA/Caur.EVM.08133-RA/Caur.EVM.08351-RA/Caur.EVM.12566-RA/Caur.EVM.02254-RA	19
GO:0050702	BP	GO:0050702	interleukin-1 beta secretion	0.0125966	0.634028	0.624545	Caur.EVM.35947-RA/Caur.EVM.09543-RA/Caur.EVM.32721-RA/Caur.EVM.30598-RA/Caur.EVM.22561-RA/Caur.EVM.01523-RA/Caur.EVM.38308-RA/Caur.EVM.04137-RA/Caur.EVM.36804-RA	9
GO:0002682	BP	GO:0002682	regulation of immune system process	0.013094	0.649649	0.639932	Caur.EVM.35947-RA/Caur.EVM.16687-RA/Caur.EVM.22242-RA/Caur.EVM.04625-RA/Caur.EVM.30114-RA/Caur.EVM.32721-RA/Caur.EVM.32506-RA/Caur.EVM.11377-RA/Caur.EVM.13460-RA/Caur.EVM.34162-RA/Caur.EVM.36361-RA/Caur.EVM.29437-RA/Caur.EVM.05826-RA/Caur.EVM.23589-RA/Caur.EVM.01364-RA/Caur.EVM.16485-RA/Caur.EVM.30195-RA/Caur.EVM.12009-RA/Caur.EVM.33019-RA/Caur.EVM.07669-RA/Caur.EVM.34903-RA/Caur.EVM.30547-RA/Cau…	53
GO:0048840	BP	GO:0048840	otolith development	0.0136147	0.665972	0.65601	Caur.EVM.32212-RA/Caur.EVM.02541-RA/Caur.EVM.18072-RA/Caur.EVM.08108-RA/Caur.EVM.31583-RA/Caur.EVM.12078-RA/Caur.EVM.04899-RA/Caur.EVM.02479-RA/Caur.EVM.26683-RA/Caur.EVM.12829-RA/Caur.EVM.18401-RA/Caur.EVM.26010-RA/Caur.EVM.17773-RA	13
GO:0048514	BP	GO:0048514	blood vessel morphogenesis	0.0139839	0.674531	0.664442	Caur.EVM.33845-RA/Caur.EVM.17428-RA/Caur.EVM.07527-RA/Caur.EVM.29488-RA/Caur.EVM.35322-RA/Caur.EVM.05206-RA/Caur.EVM.03129-RA/Caur.EVM.00189-RA/Caur.EVM.33001-RA/Caur.EVM.10992-RA/Caur.EVM.02598-RA/Caur.EVM.06713-RA/Caur.EVM.15226-RA/Caur.EVM.26779-RA/Caur.EVM.30208-RA/Caur.EVM.36361-RA/Caur.EVM.24636-RA/Caur.EVM.16485-RA/Caur.EVM.31193-RA/Caur.EVM.02581-RA/Caur.EVM.23311-RA/Caur.EVM.38361-RA/Cau…	67
GO:0060986	BP	GO:0060986	endocrine hormone secretion	0.0144408	0.68309	0.672873	Caur.EVM.01630-RA/Caur.EVM.28051-RA/Caur.EVM.30208-RA/Caur.EVM.30078-RA/Caur.EVM.18511-RA/Caur.EVM.22263-RA	6
GO:0001824	BP	GO:0001824	blastocyst development	0.0145548	0.68309	0.672873	Caur.EVM.02581-RA/Caur.EVM.22498-RA/Caur.EVM.32138-RA/Caur.EVM.20423-RA/Caur.EVM.08133-RA	5
GO:0050900	BP	GO:0050900	leukocyte migration	0.0158784	0.72537	0.71452	Caur.EVM.11677-RA/Caur.EVM.35279-RA/Caur.EVM.04625-RA/Caur.EVM.02455-RA/Caur.EVM.05442-RA/Caur.EVM.21499-RA/Caur.EVM.34162-RA/Caur.EVM.14870-RA/Caur.EVM.24931-RA/Caur.EVM.16485-RA/Caur.EVM.18848-RA/Caur.EVM.04883-RA/Caur.EVM.12009-RA/Caur.EVM.31583-RA/Caur.EVM.34566-RA/Caur.EVM.30547-RA/Caur.EVM.34567-RA/Caur.EVM.07820-RA/Caur.EVM.28009-RA/Caur.EVM.27073-RA/Caur.EVM.27706-RA/Caur.EVM.16851-RA/Cau…	30
GO:0044057	BP	GO:0044057	regulation of system process	0.0159481	0.72537	0.71452	Caur.EVM.01630-RA/Caur.EVM.01682-RA/Caur.EVM.28051-RA/Caur.EVM.15363-RA/Caur.EVM.00478-RA/Caur.EVM.32212-RA/Caur.EVM.01300-RA/Caur.EVM.15913-RA/Caur.EVM.14666-RA/Caur.EVM.31891-RA/Caur.EVM.30208-RA/Caur.EVM.00531-RA/Caur.EVM.18599-RA/Caur.EVM.24636-RA/Caur.EVM.30078-RA/Caur.EVM.39035-RA/Caur.EVM.00266-RA/Caur.EVM.08944-RA/Caur.EVM.04744-RA/Caur.EVM.20340-RA/Caur.EVM.12078-RA/Caur.EVM.27561-RA/Cau…	42
GO:0043589	BP	GO:0043589	skin morphogenesis	0.0167784	0.72537	0.71452	Caur.EVM.35279-RA/Caur.EVM.01630-RA/Caur.EVM.28051-RA/Caur.EVM.02455-RA/Caur.EVM.03509-RA/Caur.EVM.34339-RA/Caur.EVM.33718-RA	7
GO:0050886	BP	GO:0050886	endocrine process	0.0167784	0.72537	0.71452	Caur.EVM.01630-RA/Caur.EVM.28051-RA/Caur.EVM.30208-RA/Caur.EVM.30078-RA/Caur.EVM.18511-RA/Caur.EVM.22263-RA/Caur.EVM.10234-RA	7
GO:0050673	BP	GO:0050673	epithelial cell proliferation	0.0169939	0.72537	0.71452	Caur.EVM.33099-RA/Caur.EVM.01630-RA/Caur.EVM.28051-RA/Caur.EVM.15363-RA/Caur.EVM.29488-RA/Caur.EVM.05206-RA/Caur.EVM.00189-RA/Caur.EVM.10992-RA/Caur.EVM.01567-RA/Caur.EVM.33301-RA/Caur.EVM.30195-RA/Caur.EVM.05194-RA/Caur.EVM.25437-RA/Caur.EVM.02479-RA/Caur.EVM.34474-RA/Caur.EVM.37499-RA/Caur.EVM.34355-RA/Caur.EVM.06565-RA/Caur.EVM.26732-RA/Caur.EVM.25130-RA/Caur.EVM.24334-RA	21
GO:0032611	BP	GO:0032611	interleukin-1 beta production	0.0181256	0.72537	0.71452	Caur.EVM.35947-RA/Caur.EVM.09543-RA/Caur.EVM.32721-RA/Caur.EVM.30598-RA/Caur.EVM.22561-RA/Caur.EVM.01523-RA/Caur.EVM.38308-RA/Caur.EVM.04137-RA/Caur.EVM.36804-RA	9
GO:0050701	BP	GO:0050701	interleukin-1 secretion	0.0181256	0.72537	0.71452	Caur.EVM.35947-RA/Caur.EVM.09543-RA/Caur.EVM.32721-RA/Caur.EVM.30598-RA/Caur.EVM.22561-RA/Caur.EVM.01523-RA/Caur.EVM.38308-RA/Caur.EVM.04137-RA/Caur.EVM.36804-RA	9
GO:0033003	BP	GO:0033003	regulation of mast cell activation	0.0187144	0.72537	0.71452	Caur.EVM.30114-RA/Caur.EVM.29437-RA/Caur.EVM.30547-RA/Caur.EVM.02254-RA	4
GO:0042430	BP	GO:0042430	indole-containing compound metabolic process	0.0187144	0.72537	0.71452	Caur.EVM.32212-RA/Caur.EVM.21836-RA/Caur.EVM.15988-RA/Caur.EVM.12078-RA	4
GO:0043535	BP	GO:0043535	regulation of blood vessel endothelial cell migration	0.0187255	0.72537	0.71452	Caur.EVM.01024-RA/Caur.EVM.11577-RA/Caur.EVM.23836-RA/Caur.EVM.37499-RA/Caur.EVM.06565-RA/Caur.EVM.25903-RA	6
GO:0046717	BP	GO:0046717	acid secretion	0.0187255	0.72537	0.71452	Caur.EVM.01683-RA/Caur.EVM.19867-RA/Caur.EVM.33370-RA/Caur.EVM.18511-RA/Caur.EVM.27880-RA/Caur.EVM.15945-RA	6
GO:0014706	BP	GO:0014706	striated muscle tissue development	0.0193152	0.72537	0.71452	Caur.EVM.17428-RA/Caur.EVM.15913-RA/Caur.EVM.01986-RA/Caur.EVM.10978-RA/Caur.EVM.16330-RA/Caur.EVM.05206-RA/Caur.EVM.06713-RA/Caur.EVM.00531-RA/Caur.EVM.10070-RA/Caur.EVM.01567-RA/Caur.EVM.02581-RA/Caur.EVM.30195-RA/Caur.EVM.00564-RA/Caur.EVM.05194-RA/Caur.EVM.34451-RA/Caur.EVM.04744-RA/Caur.EVM.03945-RA/Caur.EVM.06422-RA/Caur.EVM.19780-RA/Caur.EVM.03862-RA/Caur.EVM.23824-RA/Caur.EVM.17863-RA/Cau…	57
GO:0001975	BP	GO:0001975	response to amphetamine	0.0198647	0.72537	0.71452	Caur.EVM.01683-RA/Caur.EVM.14226-RA/Caur.EVM.38991-RA/Caur.EVM.30995-RA/Caur.EVM.14685-RA	5
GO:0003128	BP	GO:0003128	heart field specification	0.0198647	0.72537	0.71452	Caur.EVM.30195-RA/Caur.EVM.32869-RA/Caur.EVM.05257-RA/Caur.EVM.34355-RA/Caur.EVM.20828-RA	5
GO:0014888	BP	GO:0014888	striated muscle adaptation	0.0198647	0.72537	0.71452	Caur.EVM.00531-RA/Caur.EVM.10070-RA/Caur.EVM.17863-RA/Caur.EVM.09856-RA/Caur.EVM.34355-RA	5
GO:0045409	BP	GO:0045409	negative regulation of interleukin-6 biosynthetic process	0.0198647	0.72537	0.71452	Caur.EVM.09543-RA/Caur.EVM.30598-RA/Caur.EVM.22561-RA/Caur.EVM.01523-RA/Caur.EVM.38308-RA	5
GO:0050706	BP	GO:0050706	regulation of interleukin-1 beta secretion	0.0198647	0.72537	0.71452	Caur.EVM.09543-RA/Caur.EVM.30598-RA/Caur.EVM.22561-RA/Caur.EVM.01523-RA/Caur.EVM.38308-RA	5
GO:0050718	BP	GO:0050718	positive regulation of interleukin-1 beta secretion	0.0198647	0.72537	0.71452	Caur.EVM.09543-RA/Caur.EVM.30598-RA/Caur.EVM.22561-RA/Caur.EVM.01523-RA/Caur.EVM.38308-RA	5
GO:0001906	BP	GO:0001906	cell killing	0.0208064	0.72537	0.71452	Caur.EVM.16687-RA/Caur.EVM.22242-RA/Caur.EVM.30395-RA/Caur.EVM.29437-RA/Caur.EVM.10985-RA/Caur.EVM.38991-RA/Caur.EVM.12566-RA	7
GO:0002365	BP	GO:0002365	gamma-delta T cell lineage commitment	0.0208064	0.72537	0.71452	Caur.EVM.01902-RA/Caur.EVM.10641-RA/Caur.EVM.23664-RA/Caur.EVM.32726-RA/Caur.EVM.21878-RA/Caur.EVM.23529-RA/Caur.EVM.28440-RA	7
GO:0071236	BP	GO:0071236	cellular response to antibiotic	0.0208064	0.72537	0.71452	Caur.EVM.30208-RA/Caur.EVM.03945-RA/Caur.EVM.34903-RA/Caur.EVM.19867-RA/Caur.EVM.34355-RA/Caur.EVM.27880-RA/Caur.EVM.15945-RA	7
GO:0072606	BP	GO:0072606	interleukin-8 secretion	0.0208064	0.72537	0.71452	Caur.EVM.01902-RA/Caur.EVM.10641-RA/Caur.EVM.23664-RA/Caur.EVM.32726-RA/Caur.EVM.21878-RA/Caur.EVM.23529-RA/Caur.EVM.28440-RA	7
GO:2000482	BP	GO:2000482	regulation of interleukin-8 secretion	0.0208064	0.72537	0.71452	Caur.EVM.01902-RA/Caur.EVM.10641-RA/Caur.EVM.23664-RA/Caur.EVM.32726-RA/Caur.EVM.21878-RA/Caur.EVM.23529-RA/Caur.EVM.28440-RA	7
GO:0000768	BP	GO:0000768	syncytium formation by plasma membrane fusion	0.0208781	0.72537	0.71452	Caur.EVM.05893-RA/Caur.EVM.16330-RA/Caur.EVM.03945-RA/Caur.EVM.18515-RA/Caur.EVM.27368-RA/Caur.EVM.19070-RA/Caur.EVM.34355-RA/Caur.EVM.39173-RA/Caur.EVM.13425-RA/Caur.EVM.08576-RA	10
GO:0006949	BP	GO:0006949	syncytium formation	0.0208781	0.72537	0.71452	Caur.EVM.05893-RA/Caur.EVM.16330-RA/Caur.EVM.03945-RA/Caur.EVM.18515-RA/Caur.EVM.27368-RA/Caur.EVM.19070-RA/Caur.EVM.34355-RA/Caur.EVM.39173-RA/Caur.EVM.13425-RA/Caur.EVM.08576-RA	10
GO:0009595	BP	GO:0009595	detection of biotic stimulus	0.0214697	0.72537	0.71452	Caur.EVM.35947-RA/Caur.EVM.09543-RA/Caur.EVM.32721-RA/Caur.EVM.30598-RA/Caur.EVM.22561-RA/Caur.EVM.01523-RA/Caur.EVM.38308-RA/Caur.EVM.04137-RA/Caur.EVM.36804-RA	9
GO:0007605	BP	GO:0007605	sensory perception of sound	0.0216121	0.72537	0.71452	Caur.EVM.29469-RA/Caur.EVM.35279-RA/Caur.EVM.32212-RA/Caur.EVM.02455-RA/Caur.EVM.20623-RA/Caur.EVM.18208-RA/Caur.EVM.12078-RA/Caur.EVM.29470-RA/Caur.EVM.26403-RA/Caur.EVM.10968-RA/Caur.EVM.33747-RA/Caur.EVM.36248-RA	12
GO:0045017	BP	GO:0045017	glycerolipid biosynthetic process	0.0216121	0.72537	0.71452	Caur.EVM.30114-RA/Caur.EVM.30810-RA/Caur.EVM.28386-RA/Caur.EVM.22692-RA/Caur.EVM.19867-RA/Caur.EVM.33866-RA/Caur.EVM.22794-RA/Caur.EVM.06644-RA/Caur.EVM.39019-RA/Caur.EVM.21646-RA/Caur.EVM.27880-RA/Caur.EVM.15945-RA	12
GO:0043588	BP	GO:0043588	skin development	0.0217819	0.72537	0.71452	Caur.EVM.35279-RA/Caur.EVM.01630-RA/Caur.EVM.28051-RA/Caur.EVM.32212-RA/Caur.EVM.02455-RA/Caur.EVM.32506-RA/Caur.EVM.03509-RA/Caur.EVM.36361-RA/Caur.EVM.26054-RA/Caur.EVM.33940-RA/Caur.EVM.08108-RA/Caur.EVM.05194-RA/Caur.EVM.31583-RA/Caur.EVM.16692-RA/Caur.EVM.32869-RA/Caur.EVM.38537-RA/Caur.EVM.31951-RA/Caur.EVM.04284-RA/Caur.EVM.19780-RA/Caur.EVM.12078-RA/Caur.EVM.05257-RA/Caur.EVM.06644-RA/Cau…	35
GO:0050776	BP	GO:0050776	regulation of immune response	0.0218943	0.72537	0.71452	Caur.EVM.35947-RA/Caur.EVM.16687-RA/Caur.EVM.22242-RA/Caur.EVM.30114-RA/Caur.EVM.32721-RA/Caur.EVM.32506-RA/Caur.EVM.13460-RA/Caur.EVM.29437-RA/Caur.EVM.05826-RA/Caur.EVM.23589-RA/Caur.EVM.01364-RA/Caur.EVM.34903-RA/Caur.EVM.30547-RA/Caur.EVM.10985-RA/Caur.EVM.03283-RA/Caur.EVM.38991-RA/Caur.EVM.04137-RA/Caur.EVM.28009-RA/Caur.EVM.27073-RA/Caur.EVM.16437-RA/Caur.EVM.28532-RA/Caur.EVM.32138-RA/Cau…	31
GO:0060537	BP	GO:0060537	muscle tissue development	0.0222217	0.72537	0.71452	Caur.EVM.17428-RA/Caur.EVM.15913-RA/Caur.EVM.01986-RA/Caur.EVM.10978-RA/Caur.EVM.16330-RA/Caur.EVM.05206-RA/Caur.EVM.06713-RA/Caur.EVM.00531-RA/Caur.EVM.10070-RA/Caur.EVM.01567-RA/Caur.EVM.02581-RA/Caur.EVM.30195-RA/Caur.EVM.00564-RA/Caur.EVM.05194-RA/Caur.EVM.34451-RA/Caur.EVM.04744-RA/Caur.EVM.03945-RA/Caur.EVM.06422-RA/Caur.EVM.19780-RA/Caur.EVM.03862-RA/Caur.EVM.23824-RA/Caur.EVM.17863-RA/Cau…	57
GO:0009410	BP	GO:0009410	response to xenobiotic stimulus	0.0224149	0.72537	0.71452	Caur.EVM.14456-RA/Caur.EVM.30002-RA/Caur.EVM.29574-RA/Caur.EVM.15913-RA/Caur.EVM.01683-RA/Caur.EVM.08263-RA/Caur.EVM.30208-RA/Caur.EVM.17245-RA/Caur.EVM.17244-RA/Caur.EVM.14226-RA/Caur.EVM.35863-RA/Caur.EVM.11291-RA/Caur.EVM.09691-RA/Caur.EVM.38991-RA/Caur.EVM.30995-RA/Caur.EVM.13306-RA/Caur.EVM.38768-RA/Caur.EVM.14685-RA/Caur.EVM.19553-RA/Caur.EVM.10135-RA	20
GO:0014902	BP	GO:0014902	myotube differentiation	0.0233493	0.72537	0.71452	Caur.EVM.01986-RA/Caur.EVM.10978-RA/Caur.EVM.16330-RA/Caur.EVM.10070-RA/Caur.EVM.05194-RA/Caur.EVM.34451-RA/Caur.EVM.03945-RA/Caur.EVM.06422-RA/Caur.EVM.19780-RA/Caur.EVM.03862-RA/Caur.EVM.23824-RA/Caur.EVM.17863-RA/Caur.EVM.09856-RA/Caur.EVM.18515-RA/Caur.EVM.30995-RA/Caur.EVM.02479-RA/Caur.EVM.13544-RA/Caur.EVM.38768-RA/Caur.EVM.27368-RA/Caur.EVM.18722-RA/Caur.EVM.19070-RA/Caur.EVM.34355-RA/Cau…	33
GO:0060840	BP	GO:0060840	artery development	0.0236976	0.72537	0.71452	Caur.EVM.06713-RA/Caur.EVM.36361-RA/Caur.EVM.02581-RA/Caur.EVM.38361-RA/Caur.EVM.14218-RA/Caur.EVM.22498-RA/Caur.EVM.00891-RA/Caur.EVM.02479-RA/Caur.EVM.27073-RA/Caur.EVM.34474-RA/Caur.EVM.37499-RA/Caur.EVM.11769-RA/Caur.EVM.19788-RA/Caur.EVM.36248-RA	14
GO:0002456	BP	GO:0002456	T cell mediated immunity	0.0238028	0.72537	0.71452	Caur.EVM.16687-RA/Caur.EVM.13460-RA/Caur.EVM.29437-RA/Caur.EVM.10985-RA/Caur.EVM.38991-RA/Caur.EVM.28532-RA	6
GO:0007585	BP	GO:0007585	respiratory gaseous exchange	0.0238028	0.72537	0.71452	Caur.EVM.14226-RA/Caur.EVM.33019-RA/Caur.EVM.23139-RA/Caur.EVM.09583-RA/Caur.EVM.04379-RA/Caur.EVM.08106-RA	6
GO:0046688	BP	GO:0046688	response to copper ion	0.0238028	0.72537	0.71452	Caur.EVM.30208-RA/Caur.EVM.19590-RA/Caur.EVM.20470-RA/Caur.EVM.33181-RA/Caur.EVM.07014-RA/Caur.EVM.20886-RA	6
GO:0098742	BP	GO:0098742	cell-cell adhesion via plasma-membrane adhesion molecules	0.0247748	0.72537	0.71452	Caur.EVM.11677-RA/Caur.EVM.18525-RA/Caur.EVM.21499-RA/Caur.EVM.16361-RA/Caur.EVM.29437-RA/Caur.EVM.14870-RA/Caur.EVM.24931-RA/Caur.EVM.11842-RA/Caur.EVM.04883-RA/Caur.EVM.34566-RA/Caur.EVM.35610-RA/Caur.EVM.34567-RA/Caur.EVM.17970-RA/Caur.EVM.27706-RA/Caur.EVM.16851-RA/Caur.EVM.26919-RA/Caur.EVM.16865-RA/Caur.EVM.25219-RA/Caur.EVM.05036-RA/Caur.EVM.23903-RA/Caur.EVM.05035-RA/Caur.EVM.16096-RA/Cau…	24
GO:0002706	BP	GO:0002706	regulation of lymphocyte mediated immunity	0.0254603	0.72537	0.71452	Caur.EVM.16687-RA/Caur.EVM.29437-RA/Caur.EVM.30547-RA/Caur.EVM.10985-RA/Caur.EVM.38991-RA/Caur.EVM.12566-RA/Caur.EVM.02254-RA	7
GO:0046685	BP	GO:0046685	response to arsenic-containing substance	0.0254603	0.72537	0.71452	Caur.EVM.01250-RA/Caur.EVM.29746-RA/Caur.EVM.31294-RA/Caur.EVM.29510-RA/Caur.EVM.28064-RA/Caur.EVM.30419-RA/Caur.EVM.04374-RA	7
GO:0050710	BP	GO:0050710	negative regulation of cytokine secretion	0.0254603	0.72537	0.71452	Caur.EVM.09543-RA/Caur.EVM.30598-RA/Caur.EVM.22561-RA/Caur.EVM.13460-RA/Caur.EVM.01523-RA/Caur.EVM.38308-RA/Caur.EVM.28532-RA	7
GO:0072329	BP	GO:0072329	monocarboxylic acid catabolic process	0.0254603	0.72537	0.71452	Caur.EVM.30078-RA/Caur.EVM.26890-RA/Caur.EVM.20362-RA/Caur.EVM.25521-RA/Caur.EVM.25569-RA/Caur.EVM.13328-RA/Caur.EVM.18565-RA	7
GO:0097237	BP	GO:0097237	cellular response to toxic substance	0.0254603	0.72537	0.71452	Caur.EVM.30208-RA/Caur.EVM.03945-RA/Caur.EVM.19867-RA/Caur.EVM.33181-RA/Caur.EVM.34355-RA/Caur.EVM.27880-RA/Caur.EVM.15945-RA	7
GO:0031638	BP	GO:0031638	zymogen activation	0.0257201	0.72537	0.71452	Caur.EVM.35947-RA/Caur.EVM.09543-RA/Caur.EVM.15994-RA/Caur.EVM.32721-RA/Caur.EVM.30598-RA/Caur.EVM.22561-RA/Caur.EVM.01523-RA/Caur.EVM.38308-RA/Caur.EVM.01363-RA/Caur.EVM.07820-RA/Caur.EVM.04137-RA/Caur.EVM.20423-RA/Caur.EVM.36804-RA	13
GO:0009187	BP	GO:0009187	cyclic nucleotide metabolic process	0.0257522	0.72537	0.71452	Caur.EVM.24740-RA/Caur.EVM.32212-RA/Caur.EVM.30208-RA/Caur.EVM.16513-RA/Caur.EVM.12078-RA/Caur.EVM.00520-RA/Caur.EVM.06747-RA/Caur.EVM.38397-RA	8
GO:0048263	BP	GO:0048263	determination of dorsal identity	0.0257522	0.72537	0.71452	Caur.EVM.01630-RA/Caur.EVM.28051-RA/Caur.EVM.29275-RA/Caur.EVM.23181-RA/Caur.EVM.34451-RA/Caur.EVM.24484-RA/Caur.EVM.32913-RA/Caur.EVM.19451-RA	8
GO:0014075	BP	GO:0014075	response to amine	0.0262993	0.72537	0.71452	Caur.EVM.01683-RA/Caur.EVM.14226-RA/Caur.EVM.38991-RA/Caur.EVM.30995-RA/Caur.EVM.14685-RA	5
GO:0010810	BP	GO:0010810	regulation of cell-substrate adhesion	0.0263229	0.72537	0.71452	Caur.EVM.33099-RA/Caur.EVM.35279-RA/Caur.EVM.02455-RA/Caur.EVM.20235-RA/Caur.EVM.27073-RA/Caur.EVM.34474-RA/Caur.EVM.37499-RA/Caur.EVM.06565-RA/Caur.EVM.26732-RA/Caur.EVM.10135-RA/Caur.EVM.24334-RA	11
GO:0010543	BP	GO:0010543	regulation of platelet activation	0.0268554	0.72537	0.71452	Caur.EVM.30547-RA/Caur.EVM.06644-RA/Caur.EVM.27073-RA/Caur.EVM.02254-RA	4
GO:0033563	BP	GO:0033563	dorsal/ventral axon guidance	0.0268554	0.72537	0.71452	Caur.EVM.16330-RA/Caur.EVM.18515-RA/Caur.EVM.26853-RA/Caur.EVM.33295-RA	4
GO:0045823	BP	GO:0045823	positive regulation of heart contraction	0.0268554	0.72537	0.71452	Caur.EVM.15363-RA/Caur.EVM.15913-RA/Caur.EVM.24820-RA/Caur.EVM.18511-RA	4
GO:0046470	BP	GO:0046470	phosphatidylcholine metabolic process	0.0268554	0.72537	0.71452	Caur.EVM.19867-RA/Caur.EVM.21646-RA/Caur.EVM.27880-RA/Caur.EVM.15945-RA	4
GO:0086001	BP	GO:0086001	cardiac muscle cell action potential	0.0268554	0.72537	0.71452	Caur.EVM.15363-RA/Caur.EVM.15913-RA/Caur.EVM.20340-RA/Caur.EVM.33295-RA	4
GO:2000737	BP	GO:2000737	negative regulation of stem cell differentiation	0.0268554	0.72537	0.71452	Caur.EVM.30195-RA/Caur.EVM.32869-RA/Caur.EVM.05257-RA/Caur.EVM.16059-RA	4
GO:0010952	BP	GO:0010952	positive regulation of peptidase activity	0.0272531	0.72537	0.71452	Caur.EVM.35947-RA/Caur.EVM.09543-RA/Caur.EVM.15994-RA/Caur.EVM.32721-RA/Caur.EVM.30598-RA/Caur.EVM.22561-RA/Caur.EVM.01523-RA/Caur.EVM.30195-RA/Caur.EVM.38308-RA/Caur.EVM.34661-RA/Caur.EVM.01363-RA/Caur.EVM.04137-RA/Caur.EVM.30544-RA/Caur.EVM.26709-RA/Caur.EVM.14959-RA/Caur.EVM.36804-RA	16
GO:0010631	BP	GO:0010631	epithelial cell migration	0.0273818	0.72537	0.71452	Caur.EVM.33845-RA/Caur.EVM.01024-RA/Caur.EVM.05206-RA/Caur.EVM.00189-RA/Caur.EVM.33001-RA/Caur.EVM.10992-RA/Caur.EVM.26779-RA/Caur.EVM.30208-RA/Caur.EVM.16485-RA/Caur.EVM.12009-RA/Caur.EVM.25437-RA/Caur.EVM.03945-RA/Caur.EVM.11577-RA/Caur.EVM.23836-RA/Caur.EVM.37499-RA/Caur.EVM.36443-RA/Caur.EVM.06565-RA/Caur.EVM.05864-RA/Caur.EVM.10234-RA/Caur.EVM.10135-RA/Caur.EVM.08576-RA/Caur.EVM.25903-RA/Cau…	23
GO:0090132	BP	GO:0090132	epithelium migration	0.0273818	0.72537	0.71452	Caur.EVM.33845-RA/Caur.EVM.01024-RA/Caur.EVM.05206-RA/Caur.EVM.00189-RA/Caur.EVM.33001-RA/Caur.EVM.10992-RA/Caur.EVM.26779-RA/Caur.EVM.30208-RA/Caur.EVM.16485-RA/Caur.EVM.12009-RA/Caur.EVM.25437-RA/Caur.EVM.03945-RA/Caur.EVM.11577-RA/Caur.EVM.23836-RA/Caur.EVM.37499-RA/Caur.EVM.36443-RA/Caur.EVM.06565-RA/Caur.EVM.05864-RA/Caur.EVM.10234-RA/Caur.EVM.10135-RA/Caur.EVM.08576-RA/Caur.EVM.25903-RA/Cau…	23
GO:0051336	BP	GO:0051336	regulation of hydrolase activity	0.0279465	0.72537	0.71452	Caur.EVM.35947-RA/Caur.EVM.24740-RA/Caur.EVM.37500-RA/Caur.EVM.00478-RA/Caur.EVM.03722-RA/Caur.EVM.30114-RA/Caur.EVM.09543-RA/Caur.EVM.15994-RA/Caur.EVM.32721-RA/Caur.EVM.30598-RA/Caur.EVM.15911-RA/Caur.EVM.02100-RA/Caur.EVM.22561-RA/Caur.EVM.36741-RA/Caur.EVM.01523-RA/Caur.EVM.30208-RA/Caur.EVM.02252-RA/Caur.EVM.39129-RA/Caur.EVM.39035-RA/Caur.EVM.30195-RA/Caur.EVM.19674-RA/Caur.EVM.38308-RA/Cau…	62
GO:0019722	BP	GO:0019722	calcium-mediated signaling	0.0279872	0.72537	0.71452	Caur.EVM.34361-RA/Caur.EVM.33698-RA/Caur.EVM.15913-RA/Caur.EVM.19867-RA/Caur.EVM.02603-RA/Caur.EVM.33295-RA/Caur.EVM.18511-RA/Caur.EVM.14685-RA/Caur.EVM.20559-RA/Caur.EVM.10135-RA	10
GO:0060193	BP	GO:0060193	positive regulation of lipase activity	0.0279872	0.72537	0.71452	Caur.EVM.24740-RA/Caur.EVM.33866-RA/Caur.EVM.24145-RA/Caur.EVM.28009-RA/Caur.EVM.34339-RA/Caur.EVM.33718-RA/Caur.EVM.34474-RA/Caur.EVM.18511-RA/Caur.EVM.06747-RA/Caur.EVM.14685-RA	10
GO:0001909	BP	GO:0001909	leukocyte mediated cytotoxicity	0.0297249	0.743868	0.732741	Caur.EVM.16687-RA/Caur.EVM.22242-RA/Caur.EVM.29437-RA/Caur.EVM.10985-RA/Caur.EVM.38991-RA/Caur.EVM.12566-RA	6
GO:0002705	BP	GO:0002705	positive regulation of leukocyte mediated immunity	0.0297249	0.743868	0.732741	Caur.EVM.16687-RA/Caur.EVM.29437-RA/Caur.EVM.30547-RA/Caur.EVM.10985-RA/Caur.EVM.12566-RA/Caur.EVM.02254-RA	6
GO:0002708	BP	GO:0002708	positive regulation of lymphocyte mediated immunity	0.0297249	0.743868	0.732741	Caur.EVM.16687-RA/Caur.EVM.29437-RA/Caur.EVM.30547-RA/Caur.EVM.10985-RA/Caur.EVM.12566-RA/Caur.EVM.02254-RA	6
GO:0031341	BP	GO:0031341	regulation of cell killing	0.0297249	0.743868	0.732741	Caur.EVM.16687-RA/Caur.EVM.30395-RA/Caur.EVM.29437-RA/Caur.EVM.10985-RA/Caur.EVM.38991-RA/Caur.EVM.12566-RA	6
GO:0008654	BP	GO:0008654	phospholipid biosynthetic process	0.029986	0.743868	0.732741	Caur.EVM.30114-RA/Caur.EVM.30810-RA/Caur.EVM.28386-RA/Caur.EVM.22692-RA/Caur.EVM.19867-RA/Caur.EVM.33866-RA/Caur.EVM.06644-RA/Caur.EVM.39019-RA/Caur.EVM.21646-RA/Caur.EVM.27880-RA/Caur.EVM.15945-RA	11
GO:0030595	BP	GO:0030595	leukocyte chemotaxis	0.029986	0.743868	0.732741	Caur.EVM.04625-RA/Caur.EVM.05442-RA/Caur.EVM.34162-RA/Caur.EVM.16485-RA/Caur.EVM.18848-RA/Caur.EVM.12009-RA/Caur.EVM.30547-RA/Caur.EVM.28009-RA/Caur.EVM.27073-RA/Caur.EVM.10135-RA/Caur.EVM.02254-RA	11
GO:0002822	BP	GO:0002822	regulation of adaptive immune response based on somatic recombination of immune receptors built from immunoglobulin superfamily domains	0.0307781	0.747448	0.736268	Caur.EVM.16687-RA/Caur.EVM.29437-RA/Caur.EVM.30547-RA/Caur.EVM.10985-RA/Caur.EVM.38991-RA/Caur.EVM.34355-RA/Caur.EVM.02254-RA	7
GO:0042492	BP	GO:0042492	gamma-delta T cell differentiation	0.0307781	0.747448	0.736268	Caur.EVM.01902-RA/Caur.EVM.10641-RA/Caur.EVM.23664-RA/Caur.EVM.32726-RA/Caur.EVM.21878-RA/Caur.EVM.23529-RA/Caur.EVM.28440-RA	7
GO:0046629	BP	GO:0046629	gamma-delta T cell activation	0.0307781	0.747448	0.736268	Caur.EVM.01902-RA/Caur.EVM.10641-RA/Caur.EVM.23664-RA/Caur.EVM.32726-RA/Caur.EVM.21878-RA/Caur.EVM.23529-RA/Caur.EVM.28440-RA	7
GO:0051046	BP	GO:0051046	regulation of secretion	0.0330047	0.747448	0.736268	Caur.EVM.01630-RA/Caur.EVM.24740-RA/Caur.EVM.28051-RA/Caur.EVM.01300-RA/Caur.EVM.09543-RA/Caur.EVM.30598-RA/Caur.EVM.01683-RA/Caur.EVM.01902-RA/Caur.EVM.22561-RA/Caur.EVM.13460-RA/Caur.EVM.10641-RA/Caur.EVM.01523-RA/Caur.EVM.30208-RA/Caur.EVM.30078-RA/Caur.EVM.11842-RA/Caur.EVM.00266-RA/Caur.EVM.08944-RA/Caur.EVM.23664-RA/Caur.EVM.30547-RA/Caur.EVM.38308-RA/Caur.EVM.32726-RA/Caur.EVM.38991-RA/Cau…	35
GO:0002824	BP	GO:0002824	positive regulation of adaptive immune response based on somatic recombination of immune receptors built from immunoglobulin superfamily domains	0.0339235	0.747448	0.736268	Caur.EVM.16687-RA/Caur.EVM.29437-RA/Caur.EVM.30547-RA/Caur.EVM.10985-RA/Caur.EVM.02254-RA	5
GO:0032414	BP	GO:0032414	positive regulation of ion transmembrane transporter activity	0.0339235	0.747448	0.736268	Caur.EVM.15913-RA/Caur.EVM.33295-RA/Caur.EVM.14685-RA/Caur.EVM.18596-RA/Caur.EVM.10968-RA	5
GO:0032651	BP	GO:0032651	regulation of interleukin-1 beta production	0.0339235	0.747448	0.736268	Caur.EVM.09543-RA/Caur.EVM.30598-RA/Caur.EVM.22561-RA/Caur.EVM.01523-RA/Caur.EVM.38308-RA	5
GO:0032731	BP	GO:0032731	positive regulation of interleukin-1 beta production	0.0339235	0.747448	0.736268	Caur.EVM.09543-RA/Caur.EVM.30598-RA/Caur.EVM.22561-RA/Caur.EVM.01523-RA/Caur.EVM.38308-RA	5
GO:0050704	BP	GO:0050704	regulation of interleukin-1 secretion	0.0339235	0.747448	0.736268	Caur.EVM.09543-RA/Caur.EVM.30598-RA/Caur.EVM.22561-RA/Caur.EVM.01523-RA/Caur.EVM.38308-RA	5
GO:0050716	BP	GO:0050716	positive regulation of interleukin-1 secretion	0.0339235	0.747448	0.736268	Caur.EVM.09543-RA/Caur.EVM.30598-RA/Caur.EVM.22561-RA/Caur.EVM.01523-RA/Caur.EVM.38308-RA	5
GO:0010863	BP	GO:0010863	positive regulation of phospholipase C activity	0.0341217	0.747448	0.736268	Caur.EVM.24740-RA/Caur.EVM.24145-RA/Caur.EVM.28009-RA/Caur.EVM.34339-RA/Caur.EVM.33718-RA/Caur.EVM.34474-RA/Caur.EVM.18511-RA/Caur.EVM.06747-RA/Caur.EVM.14685-RA	9
GO:0043524	BP	GO:0043524	negative regulation of neuron apoptotic process	0.0341217	0.747448	0.736268	Caur.EVM.14226-RA/Caur.EVM.26047-RA/Caur.EVM.28009-RA/Caur.EVM.32143-RA/Caur.EVM.38542-RA/Caur.EVM.34355-RA/Caur.EVM.03188-RA/Caur.EVM.38778-RA/Caur.EVM.36248-RA	9
GO:1900274	BP	GO:1900274	regulation of phospholipase C activity	0.0341217	0.747448	0.736268	Caur.EVM.24740-RA/Caur.EVM.24145-RA/Caur.EVM.28009-RA/Caur.EVM.34339-RA/Caur.EVM.33718-RA/Caur.EVM.34474-RA/Caur.EVM.18511-RA/Caur.EVM.06747-RA/Caur.EVM.14685-RA	9
GO:1903522	BP	GO:1903522	regulation of blood circulation	0.0355045	0.747448	0.736268	Caur.EVM.01682-RA/Caur.EVM.15363-RA/Caur.EVM.01300-RA/Caur.EVM.15913-RA/Caur.EVM.31891-RA/Caur.EVM.24636-RA/Caur.EVM.00266-RA/Caur.EVM.20340-RA/Caur.EVM.33295-RA/Caur.EVM.24820-RA/Caur.EVM.38768-RA/Caur.EVM.34474-RA/Caur.EVM.18511-RA/Caur.EVM.22825-RA/Caur.EVM.16378-RA/Caur.EVM.20559-RA/Caur.EVM.01274-RA/Caur.EVM.19788-RA	18
GO:1903530	BP	GO:1903530	regulation of secretion by cell	0.0356793	0.747448	0.736268	Caur.EVM.01630-RA/Caur.EVM.24740-RA/Caur.EVM.28051-RA/Caur.EVM.01300-RA/Caur.EVM.09543-RA/Caur.EVM.30598-RA/Caur.EVM.01683-RA/Caur.EVM.01902-RA/Caur.EVM.22561-RA/Caur.EVM.13460-RA/Caur.EVM.10641-RA/Caur.EVM.01523-RA/Caur.EVM.30078-RA/Caur.EVM.11842-RA/Caur.EVM.00266-RA/Caur.EVM.23664-RA/Caur.EVM.30547-RA/Caur.EVM.38308-RA/Caur.EVM.32726-RA/Caur.EVM.38991-RA/Caur.EVM.34362-RA/Caur.EVM.21878-RA/Cau…	33
GO:1902532	BP	GO:1902532	negative regulation of intracellular signal transduction	0.0359795	0.747448	0.736268	Caur.EVM.37500-RA/Caur.EVM.34491-RA/Caur.EVM.05116-RA/Caur.EVM.30309-RA/Caur.EVM.27725-RA/Caur.EVM.09543-RA/Caur.EVM.30598-RA/Caur.EVM.22561-RA/Caur.EVM.01523-RA/Caur.EVM.39129-RA/Caur.EVM.39035-RA/Caur.EVM.31193-RA/Caur.EVM.38308-RA/Caur.EVM.16036-RA/Caur.EVM.26853-RA/Caur.EVM.34882-RA/Caur.EVM.27073-RA/Caur.EVM.07871-RA/Caur.EVM.21868-RA/Caur.EVM.37499-RA/Caur.EVM.37115-RA/Caur.EVM.26322-RA/Cau…	26
GO:0002250	BP	GO:0002250	adaptive immune response	0.0359851	0.747448	0.736268	Caur.EVM.16687-RA/Caur.EVM.13460-RA/Caur.EVM.29437-RA/Caur.EVM.08831-RA/Caur.EVM.04189-RA/Caur.EVM.03945-RA/Caur.EVM.30547-RA/Caur.EVM.10985-RA/Caur.EVM.38991-RA/Caur.EVM.28532-RA/Caur.EVM.34355-RA/Caur.EVM.32136-RA/Caur.EVM.04188-RA/Caur.EVM.25378-RA/Caur.EVM.01756-RA/Caur.EVM.12566-RA/Caur.EVM.02254-RA	17
GO:0032103	BP	GO:0032103	positive regulation of response to external stimulus	0.0363946	0.747448	0.736268	Caur.EVM.09543-RA/Caur.EVM.30598-RA/Caur.EVM.10978-RA/Caur.EVM.22561-RA/Caur.EVM.01523-RA/Caur.EVM.16485-RA/Caur.EVM.31193-RA/Caur.EVM.12009-RA/Caur.EVM.30547-RA/Caur.EVM.38308-RA/Caur.EVM.28009-RA/Caur.EVM.27073-RA/Caur.EVM.10135-RA/Caur.EVM.02254-RA	14
GO:0043280	BP	GO:0043280	positive regulation of cysteine-type endopeptidase activity involved in apoptotic process	0.0364758	0.747448	0.736268	Caur.EVM.35947-RA/Caur.EVM.09543-RA/Caur.EVM.15994-RA/Caur.EVM.32721-RA/Caur.EVM.30598-RA/Caur.EVM.22561-RA/Caur.EVM.01523-RA/Caur.EVM.30195-RA/Caur.EVM.38308-RA/Caur.EVM.34661-RA/Caur.EVM.01363-RA/Caur.EVM.04137-RA/Caur.EVM.30544-RA/Caur.EVM.14959-RA/Caur.EVM.36804-RA	15
GO:2001056	BP	GO:2001056	positive regulation of cysteine-type endopeptidase activity	0.0364758	0.747448	0.736268	Caur.EVM.35947-RA/Caur.EVM.09543-RA/Caur.EVM.15994-RA/Caur.EVM.32721-RA/Caur.EVM.30598-RA/Caur.EVM.22561-RA/Caur.EVM.01523-RA/Caur.EVM.30195-RA/Caur.EVM.38308-RA/Caur.EVM.34661-RA/Caur.EVM.01363-RA/Caur.EVM.04137-RA/Caur.EVM.30544-RA/Caur.EVM.14959-RA/Caur.EVM.36804-RA	15
GO:0003151	BP	GO:0003151	outflow tract morphogenesis	0.0365358	0.747448	0.736268	Caur.EVM.00266-RA/Caur.EVM.02581-RA/Caur.EVM.22498-RA/Caur.EVM.34355-RA/Caur.EVM.26640-RA/Caur.EVM.36248-RA	6
GO:0010092	BP	GO:0010092	specification of animal organ identity	0.0365358	0.747448	0.736268	Caur.EVM.30195-RA/Caur.EVM.32869-RA/Caur.EVM.05257-RA/Caur.EVM.34355-RA/Caur.EVM.20828-RA/Caur.EVM.36248-RA	6
GO:0031952	BP	GO:0031952	regulation of protein autophosphorylation	0.0365358	0.747448	0.736268	Caur.EVM.09543-RA/Caur.EVM.30598-RA/Caur.EVM.22561-RA/Caur.EVM.01523-RA/Caur.EVM.38308-RA/Caur.EVM.06644-RA	6
GO:0046888	BP	GO:0046888	negative regulation of hormone secretion	0.0365358	0.747448	0.736268	Caur.EVM.01630-RA/Caur.EVM.24740-RA/Caur.EVM.28051-RA/Caur.EVM.00266-RA/Caur.EVM.22263-RA/Caur.EVM.38397-RA	6
GO:0071824	BP	GO:0071824	protein-DNA complex subunit organization	0.0366673	0.747448	0.736268	Caur.EVM.19577-RA/Caur.EVM.05474-RA/Caur.EVM.30981-RA/Caur.EVM.07820-RA/Caur.EVM.13257-RA/Caur.EVM.23139-RA/Caur.EVM.09583-RA/Caur.EVM.38629-RA/Caur.EVM.20828-RA/Caur.EVM.01393-RA	10
GO:0002688	BP	GO:0002688	regulation of leukocyte chemotaxis	0.0367932	0.747448	0.736268	Caur.EVM.04625-RA/Caur.EVM.34162-RA/Caur.EVM.16485-RA/Caur.EVM.12009-RA/Caur.EVM.28009-RA/Caur.EVM.27073-RA/Caur.EVM.10135-RA	7
GO:0006576	BP	GO:0006576	cellular biogenic amine metabolic process	0.0367932	0.747448	0.736268	Caur.EVM.15988-RA/Caur.EVM.19867-RA/Caur.EVM.38411-RA/Caur.EVM.30995-RA/Caur.EVM.21646-RA/Caur.EVM.27880-RA/Caur.EVM.15945-RA	7
GO:0048538	BP	GO:0048538	thymus development	0.0367932	0.747448	0.736268	Caur.EVM.08597-RA/Caur.EVM.02581-RA/Caur.EVM.33019-RA/Caur.EVM.22498-RA/Caur.EVM.00891-RA/Caur.EVM.36248-RA/Caur.EVM.11727-RA	7
GO:0050729	BP	GO:0050729	positive regulation of inflammatory response	0.0367932	0.747448	0.736268	Caur.EVM.09543-RA/Caur.EVM.30598-RA/Caur.EVM.22561-RA/Caur.EVM.01523-RA/Caur.EVM.30547-RA/Caur.EVM.38308-RA/Caur.EVM.02254-RA	7
GO:0001759	BP	GO:0001759	organ induction	0.0368021	0.747448	0.736268	Caur.EVM.30195-RA/Caur.EVM.32869-RA/Caur.EVM.05257-RA/Caur.EVM.36248-RA	4
GO:0043501	BP	GO:0043501	skeletal muscle adaptation	0.0368021	0.747448	0.736268	Caur.EVM.00531-RA/Caur.EVM.10070-RA/Caur.EVM.17863-RA/Caur.EVM.09856-RA	4
GO:0002526	BP	GO:0002526	acute inflammatory response	0.0392866	0.760164	0.748794	Caur.EVM.30114-RA/Caur.EVM.09543-RA/Caur.EVM.30598-RA/Caur.EVM.22561-RA/Caur.EVM.01523-RA/Caur.EVM.30547-RA/Caur.EVM.38308-RA/Caur.EVM.32876-RA/Caur.EVM.02254-RA	9
GO:0010632	BP	GO:0010632	regulation of epithelial cell migration	0.0392866	0.760164	0.748794	Caur.EVM.01024-RA/Caur.EVM.30208-RA/Caur.EVM.11577-RA/Caur.EVM.23836-RA/Caur.EVM.37499-RA/Caur.EVM.06565-RA/Caur.EVM.10135-RA/Caur.EVM.25903-RA/Caur.EVM.36949-RA	9
GO:0032612	BP	GO:0032612	interleukin-1 production	0.0392866	0.760164	0.748794	Caur.EVM.35947-RA/Caur.EVM.09543-RA/Caur.EVM.32721-RA/Caur.EVM.30598-RA/Caur.EVM.22561-RA/Caur.EVM.01523-RA/Caur.EVM.38308-RA/Caur.EVM.04137-RA/Caur.EVM.36804-RA	9
GO:0050709	BP	GO:0050709	negative regulation of protein secretion	0.0392866	0.760164	0.748794	Caur.EVM.24740-RA/Caur.EVM.09543-RA/Caur.EVM.30598-RA/Caur.EVM.22561-RA/Caur.EVM.13460-RA/Caur.EVM.01523-RA/Caur.EVM.38308-RA/Caur.EVM.28532-RA/Caur.EVM.38397-RA	9
GO:0030334	BP	GO:0030334	regulation of cell migration	0.0392982	0.760164	0.748794	Caur.EVM.35279-RA/Caur.EVM.01024-RA/Caur.EVM.04625-RA/Caur.EVM.02455-RA/Caur.EVM.16330-RA/Caur.EVM.34162-RA/Caur.EVM.30208-RA/Caur.EVM.16485-RA/Caur.EVM.31193-RA/Caur.EVM.02581-RA/Caur.EVM.12009-RA/Caur.EVM.28386-RA/Caur.EVM.22182-RA/Caur.EVM.22498-RA/Caur.EVM.18515-RA/Caur.EVM.11577-RA/Caur.EVM.35610-RA/Caur.EVM.16183-RA/Caur.EVM.06644-RA/Caur.EVM.28009-RA/Caur.EVM.23139-RA/Caur.EVM.09583-RA/Cau…	32
GO:0043269	BP	GO:0043269	regulation of ion transport	0.0406015	0.760164	0.748794	Caur.EVM.15363-RA/Caur.EVM.00478-RA/Caur.EVM.32212-RA/Caur.EVM.01300-RA/Caur.EVM.05054-RA/Caur.EVM.15913-RA/Caur.EVM.01683-RA/Caur.EVM.16248-RA/Caur.EVM.28086-RA/Caur.EVM.35648-RA/Caur.EVM.02323-RA/Caur.EVM.11842-RA/Caur.EVM.20340-RA/Caur.EVM.39013-RA/Caur.EVM.24335-RA/Caur.EVM.12078-RA/Caur.EVM.33295-RA/Caur.EVM.14669-RA/Caur.EVM.38768-RA/Caur.EVM.04467-RA/Caur.EVM.33370-RA/Caur.EVM.34355-RA/Cau…	34
GO:0097164	BP	GO:0097164	ammonium ion metabolic process	0.0416397	0.760164	0.748794	Caur.EVM.32212-RA/Caur.EVM.14226-RA/Caur.EVM.15988-RA/Caur.EVM.12078-RA/Caur.EVM.19867-RA/Caur.EVM.30995-RA/Caur.EVM.21646-RA/Caur.EVM.38524-RA/Caur.EVM.27880-RA/Caur.EVM.15945-RA	10
GO:0002274	BP	GO:0002274	myeloid leukocyte activation	0.0416802	0.760164	0.748794	Caur.EVM.30114-RA/Caur.EVM.29437-RA/Caur.EVM.08831-RA/Caur.EVM.03945-RA/Caur.EVM.30547-RA/Caur.EVM.24145-RA/Caur.EVM.36570-RA/Caur.EVM.02254-RA	8
GO:0090100	BP	GO:0090100	positive regulation of transmembrane receptor protein serine/threonine kinase signaling pathway	0.0416802	0.760164	0.748794	Caur.EVM.01630-RA/Caur.EVM.28051-RA/Caur.EVM.02581-RA/Caur.EVM.22498-RA/Caur.EVM.04899-RA/Caur.EVM.27926-RA/Caur.EVM.37536-RA/Caur.EVM.16059-RA	8
GO:0055065	BP	GO:0055065	metal ion homeostasis	0.0425062	0.760164	0.748794	Caur.EVM.32212-RA/Caur.EVM.15913-RA/Caur.EVM.28086-RA/Caur.EVM.14666-RA/Caur.EVM.16330-RA/Caur.EVM.24256-RA/Caur.EVM.10202-RA/Caur.EVM.18599-RA/Caur.EVM.00266-RA/Caur.EVM.08944-RA/Caur.EVM.08884-RA/Caur.EVM.02287-RA/Caur.EVM.12078-RA/Caur.EVM.18515-RA/Caur.EVM.13306-RA/Caur.EVM.33295-RA/Caur.EVM.28009-RA/Caur.EVM.30885-RA/Caur.EVM.30083-RA/Caur.EVM.04467-RA/Caur.EVM.18511-RA/Caur.EVM.14685-RA/Cau…	25
GO:0001910	BP	GO:0001910	regulation of leukocyte mediated cytotoxicity	0.0427831	0.760164	0.748794	Caur.EVM.16687-RA/Caur.EVM.29437-RA/Caur.EVM.10985-RA/Caur.EVM.38991-RA/Caur.EVM.12566-RA	5
GO:0003279	BP	GO:0003279	cardiac septum development	0.0427831	0.760164	0.748794	Caur.EVM.17428-RA/Caur.EVM.02581-RA/Caur.EVM.22498-RA/Caur.EVM.33295-RA/Caur.EVM.26640-RA	5
GO:0006081	BP	GO:0006081	cellular aldehyde metabolic process	0.0427831	0.760164	0.748794	Caur.EVM.33301-RA/Caur.EVM.26890-RA/Caur.EVM.20362-RA/Caur.EVM.25521-RA/Caur.EVM.13328-RA	5
GO:0042226	BP	GO:0042226	interleukin-6 biosynthetic process	0.0427831	0.760164	0.748794	Caur.EVM.09543-RA/Caur.EVM.30598-RA/Caur.EVM.22561-RA/Caur.EVM.01523-RA/Caur.EVM.38308-RA	5
GO:0043124	BP	GO:0043124	negative regulation of I-kappaB kinase/NF-kappaB signaling	0.0427831	0.760164	0.748794	Caur.EVM.09543-RA/Caur.EVM.30598-RA/Caur.EVM.22561-RA/Caur.EVM.01523-RA/Caur.EVM.38308-RA	5
GO:0044060	BP	GO:0044060	regulation of endocrine process	0.0427831	0.760164	0.748794	Caur.EVM.01630-RA/Caur.EVM.28051-RA/Caur.EVM.30078-RA/Caur.EVM.18511-RA/Caur.EVM.22263-RA	5
GO:0045408	BP	GO:0045408	regulation of interleukin-6 biosynthetic process	0.0427831	0.760164	0.748794	Caur.EVM.09543-RA/Caur.EVM.30598-RA/Caur.EVM.22561-RA/Caur.EVM.01523-RA/Caur.EVM.38308-RA	5
GO:1905207	BP	GO:1905207	regulation of cardiocyte differentiation	0.0427831	0.760164	0.748794	Caur.EVM.30195-RA/Caur.EVM.04744-RA/Caur.EVM.32869-RA/Caur.EVM.05257-RA/Caur.EVM.34355-RA	5
GO:0044106	BP	GO:0044106	cellular amine metabolic process	0.0431334	0.760164	0.748794	Caur.EVM.16873-RA/Caur.EVM.14226-RA/Caur.EVM.30078-RA/Caur.EVM.15988-RA/Caur.EVM.19867-RA/Caur.EVM.38411-RA/Caur.EVM.30995-RA/Caur.EVM.21646-RA/Caur.EVM.38524-RA/Caur.EVM.27880-RA/Caur.EVM.15945-RA	11
GO:0006833	BP	GO:0006833	water transport	0.0435333	0.760164	0.748794	Caur.EVM.12404-RA/Caur.EVM.30208-RA/Caur.EVM.19753-RA/Caur.EVM.34903-RA/Caur.EVM.06747-RA/Caur.EVM.03363-RA/Caur.EVM.38794-RA	7
GO:0032637	BP	GO:0032637	interleukin-8 production	0.0435333	0.760164	0.748794	Caur.EVM.01902-RA/Caur.EVM.10641-RA/Caur.EVM.23664-RA/Caur.EVM.32726-RA/Caur.EVM.21878-RA/Caur.EVM.23529-RA/Caur.EVM.28440-RA	7
GO:0032677	BP	GO:0032677	regulation of interleukin-8 production	0.0435333	0.760164	0.748794	Caur.EVM.01902-RA/Caur.EVM.10641-RA/Caur.EVM.23664-RA/Caur.EVM.32726-RA/Caur.EVM.21878-RA/Caur.EVM.23529-RA/Caur.EVM.28440-RA	7
GO:0046580	BP	GO:0046580	negative regulation of Ras protein signal transduction	0.0435333	0.760164	0.748794	Caur.EVM.37500-RA/Caur.EVM.34491-RA/Caur.EVM.30309-RA/Caur.EVM.27725-RA/Caur.EVM.39129-RA/Caur.EVM.26853-RA/Caur.EVM.37499-RA	7
GO:0051058	BP	GO:0051058	negative regulation of small GTPase mediated signal transduction	0.0435333	0.760164	0.748794	Caur.EVM.37500-RA/Caur.EVM.34491-RA/Caur.EVM.30309-RA/Caur.EVM.27725-RA/Caur.EVM.39129-RA/Caur.EVM.26853-RA/Caur.EVM.37499-RA	7
GO:0051591	BP	GO:0051591	response to cAMP	0.0435333	0.760164	0.748794	Caur.EVM.35279-RA/Caur.EVM.02455-RA/Caur.EVM.08263-RA/Caur.EVM.30208-RA/Caur.EVM.08884-RA/Caur.EVM.10135-RA/Caur.EVM.23474-RA	7
GO:0070252	BP	GO:0070252	actin-mediated cell contraction	0.0435333	0.760164	0.748794	Caur.EVM.15363-RA/Caur.EVM.15913-RA/Caur.EVM.10070-RA/Caur.EVM.17863-RA/Caur.EVM.09856-RA/Caur.EVM.33295-RA/Caur.EVM.36949-RA	7
GO:0010950	BP	GO:0010950	positive regulation of endopeptidase activity	0.0440016	0.760164	0.748794	Caur.EVM.35947-RA/Caur.EVM.09543-RA/Caur.EVM.15994-RA/Caur.EVM.32721-RA/Caur.EVM.30598-RA/Caur.EVM.22561-RA/Caur.EVM.01523-RA/Caur.EVM.30195-RA/Caur.EVM.38308-RA/Caur.EVM.34661-RA/Caur.EVM.01363-RA/Caur.EVM.04137-RA/Caur.EVM.30544-RA/Caur.EVM.14959-RA/Caur.EVM.36804-RA	15
GO:0006458	BP	GO:0006458	'de novo' protein folding	0.0442698	0.760164	0.748794	Caur.EVM.35728-RA/Caur.EVM.12028-RA/Caur.EVM.03296-RA/Caur.EVM.38542-RA/Caur.EVM.08410-RA/Caur.EVM.20788-RA	6
GO:0051084	BP	GO:0051084	'de novo' posttranslational protein folding	0.0442698	0.760164	0.748794	Caur.EVM.35728-RA/Caur.EVM.12028-RA/Caur.EVM.03296-RA/Caur.EVM.38542-RA/Caur.EVM.08410-RA/Caur.EVM.20788-RA	6
GO:0071300	BP	GO:0071300	cellular response to retinoic acid	0.0442698	0.760164	0.748794	Caur.EVM.35279-RA/Caur.EVM.02455-RA/Caur.EVM.30208-RA/Caur.EVM.30195-RA/Caur.EVM.34355-RA/Caur.EVM.10135-RA	6
GO:0046903	BP	GO:0046903	secretion	0.0443441	0.760164	0.748794	Caur.EVM.35947-RA/Caur.EVM.35728-RA/Caur.EVM.05788-RA/Caur.EVM.01630-RA/Caur.EVM.24740-RA/Caur.EVM.28051-RA/Caur.EVM.32212-RA/Caur.EVM.01300-RA/Caur.EVM.09543-RA/Caur.EVM.32721-RA/Caur.EVM.30598-RA/Caur.EVM.01683-RA/Caur.EVM.27763-RA/Caur.EVM.01902-RA/Caur.EVM.22561-RA/Caur.EVM.13460-RA/Caur.EVM.10641-RA/Caur.EVM.01523-RA/Caur.EVM.30208-RA/Caur.EVM.30078-RA/Caur.EVM.11842-RA/Caur.EVM.00266-RA/Cau…	55
GO:0002244	BP	GO:0002244	hematopoietic progenitor cell differentiation	0.0449572	0.760164	0.748794	Caur.EVM.01630-RA/Caur.EVM.28051-RA/Caur.EVM.08831-RA/Caur.EVM.02581-RA/Caur.EVM.03945-RA/Caur.EVM.22498-RA/Caur.EVM.13306-RA/Caur.EVM.21326-RA/Caur.EVM.16059-RA	9
GO:0002792	BP	GO:0002792	negative regulation of peptide secretion	0.0449572	0.760164	0.748794	Caur.EVM.24740-RA/Caur.EVM.09543-RA/Caur.EVM.30598-RA/Caur.EVM.22561-RA/Caur.EVM.13460-RA/Caur.EVM.01523-RA/Caur.EVM.38308-RA/Caur.EVM.28532-RA/Caur.EVM.38397-RA	9
GO:0003206	BP	GO:0003206	cardiac chamber morphogenesis	0.0470536	0.760164	0.748794	Caur.EVM.17428-RA/Caur.EVM.15913-RA/Caur.EVM.06713-RA/Caur.EVM.02581-RA/Caur.EVM.08902-RA/Caur.EVM.22498-RA/Caur.EVM.34355-RA/Caur.EVM.26640-RA/Caur.EVM.24708-RA/Caur.EVM.20828-RA	10
GO:0003015	BP	GO:0003015	heart process	0.0470601	0.760164	0.748794	Caur.EVM.01682-RA/Caur.EVM.15363-RA/Caur.EVM.01300-RA/Caur.EVM.15913-RA/Caur.EVM.27763-RA/Caur.EVM.31891-RA/Caur.EVM.24636-RA/Caur.EVM.39035-RA/Caur.EVM.00564-RA/Caur.EVM.20340-RA/Caur.EVM.33295-RA/Caur.EVM.24820-RA/Caur.EVM.18328-RA/Caur.EVM.38768-RA/Caur.EVM.34474-RA/Caur.EVM.18511-RA/Caur.EVM.22825-RA/Caur.EVM.16378-RA/Caur.EVM.31771-RA/Caur.EVM.20559-RA/Caur.EVM.01274-RA/Caur.EVM.19788-RA	22
GO:0031102	BP	GO:0031102	neuron projection regeneration	0.0481781	0.760164	0.748794	Caur.EVM.10978-RA/Caur.EVM.24523-RA/Caur.EVM.31193-RA/Caur.EVM.03945-RA/Caur.EVM.02479-RA/Caur.EVM.33466-RA/Caur.EVM.03188-RA/Caur.EVM.06565-RA	8
GO:0042044	BP	GO:0042044	fluid transport	0.0481781	0.760164	0.748794	Caur.EVM.12404-RA/Caur.EVM.30208-RA/Caur.EVM.19753-RA/Caur.EVM.34903-RA/Caur.EVM.06747-RA/Caur.EVM.03363-RA/Caur.EVM.38794-RA/Caur.EVM.16244-RA	8
GO:0044242	BP	GO:0044242	cellular lipid catabolic process	0.0481781	0.760164	0.748794	Caur.EVM.30078-RA/Caur.EVM.19867-RA/Caur.EVM.33866-RA/Caur.EVM.26890-RA/Caur.EVM.20362-RA/Caur.EVM.25521-RA/Caur.EVM.25569-RA/Caur.EVM.13328-RA	8
GO:0001516	BP	GO:0001516	prostaglandin biosynthetic process	0.0485867	0.760164	0.748794	Caur.EVM.19867-RA/Caur.EVM.18511-RA/Caur.EVM.27880-RA/Caur.EVM.15945-RA	4
GO:0001773	BP	GO:0001773	myeloid dendritic cell activation	0.0485867	0.760164	0.748794	Caur.EVM.08831-RA/Caur.EVM.03945-RA/Caur.EVM.24145-RA/Caur.EVM.36570-RA	4
GO:0006775	BP	GO:0006775	fat-soluble vitamin metabolic process	0.0485867	0.760164	0.748794	Caur.EVM.20362-RA/Caur.EVM.25521-RA/Caur.EVM.25569-RA/Caur.EVM.00474-RA	4
GO:0014896	BP	GO:0014896	muscle hypertrophy	0.0485867	0.760164	0.748794	Caur.EVM.15913-RA/Caur.EVM.00531-RA/Caur.EVM.04744-RA/Caur.EVM.34355-RA	4
GO:0046457	BP	GO:0046457	prostanoid biosynthetic process	0.0485867	0.760164	0.748794	Caur.EVM.19867-RA/Caur.EVM.18511-RA/Caur.EVM.27880-RA/Caur.EVM.15945-RA	4
GO:0060411	BP	GO:0060411	cardiac septum morphogenesis	0.0485867	0.760164	0.748794	Caur.EVM.17428-RA/Caur.EVM.02581-RA/Caur.EVM.22498-RA/Caur.EVM.26640-RA	4
GO:0086036	BP	GO:0086036	regulation of cardiac muscle cell membrane potential	0.0485867	0.760164	0.748794	Caur.EVM.15363-RA/Caur.EVM.15913-RA/Caur.EVM.20340-RA/Caur.EVM.33295-RA	4
GO:0090102	BP	GO:0090102	cochlea development	0.0485867	0.760164	0.748794	Caur.EVM.32212-RA/Caur.EVM.12078-RA/Caur.EVM.26640-RA/Caur.EVM.36248-RA	4
GO:0050778	BP	GO:0050778	positive regulation of immune response	0.0486971	0.760164	0.748794	Caur.EVM.35947-RA/Caur.EVM.16687-RA/Caur.EVM.22242-RA/Caur.EVM.30114-RA/Caur.EVM.32721-RA/Caur.EVM.13460-RA/Caur.EVM.29437-RA/Caur.EVM.05826-RA/Caur.EVM.30547-RA/Caur.EVM.10985-RA/Caur.EVM.03283-RA/Caur.EVM.04137-RA/Caur.EVM.28009-RA/Caur.EVM.27073-RA/Caur.EVM.28532-RA/Caur.EVM.32138-RA/Caur.EVM.34355-RA/Caur.EVM.20423-RA/Caur.EVM.36804-RA/Caur.EVM.08133-RA/Caur.EVM.08351-RA/Caur.EVM.12566-RA/Cau…	23
GO:0071229	BP	GO:0071229	cellular response to acid chemical	0.0488596	0.760164	0.748794	Caur.EVM.35279-RA/Caur.EVM.02455-RA/Caur.EVM.32506-RA/Caur.EVM.14666-RA/Caur.EVM.30208-RA/Caur.EVM.30195-RA/Caur.EVM.03945-RA/Caur.EVM.34903-RA/Caur.EVM.07820-RA/Caur.EVM.34355-RA/Caur.EVM.18511-RA/Caur.EVM.10135-RA	12
GO:0003205	BP	GO:0003205	cardiac chamber development	0.0489561	0.760164	0.748794	Caur.EVM.17428-RA/Caur.EVM.15363-RA/Caur.EVM.15913-RA/Caur.EVM.06713-RA/Caur.EVM.02581-RA/Caur.EVM.08902-RA/Caur.EVM.22498-RA/Caur.EVM.02479-RA/Caur.EVM.33295-RA/Caur.EVM.34355-RA/Caur.EVM.26640-RA/Caur.EVM.24708-RA/Caur.EVM.20828-RA	13
GO:0002684	BP	GO:0002684	positive regulation of immune system process	0.0491342	0.760164	0.748794	Caur.EVM.35947-RA/Caur.EVM.16687-RA/Caur.EVM.22242-RA/Caur.EVM.30114-RA/Caur.EVM.32721-RA/Caur.EVM.13460-RA/Caur.EVM.36361-RA/Caur.EVM.29437-RA/Caur.EVM.05826-RA/Caur.EVM.30195-RA/Caur.EVM.07669-RA/Caur.EVM.30547-RA/Caur.EVM.10985-RA/Caur.EVM.29103-RA/Caur.EVM.03283-RA/Caur.EVM.04137-RA/Caur.EVM.28009-RA/Caur.EVM.38542-RA/Caur.EVM.27073-RA/Caur.EVM.16437-RA/Caur.EVM.28532-RA/Caur.EVM.32138-RA/Cau…	32
GO:0042060	BP	GO:0042060	wound healing	0.0492985	0.760164	0.748794	Caur.EVM.35728-RA/Caur.EVM.11677-RA/Caur.EVM.02411-RA/Caur.EVM.35279-RA/Caur.EVM.32212-RA/Caur.EVM.30114-RA/Caur.EVM.02455-RA/Caur.EVM.31278-RA/Caur.EVM.32506-RA/Caur.EVM.21499-RA/Caur.EVM.03901-RA/Caur.EVM.18431-RA/Caur.EVM.37785-RA/Caur.EVM.30208-RA/Caur.EVM.29847-RA/Caur.EVM.36361-RA/Caur.EVM.00531-RA/Caur.EVM.14870-RA/Caur.EVM.24931-RA/Caur.EVM.16485-RA/Caur.EVM.04883-RA/Caur.EVM.30195-RA/Cau…	66
GO:0048878	BP	GO:0048878	chemical homeostasis	0.0499306	0.760164	0.748794	Caur.EVM.17428-RA/Caur.EVM.15363-RA/Caur.EVM.32212-RA/Caur.EVM.09519-RA/Caur.EVM.15913-RA/Caur.EVM.27802-RA/Caur.EVM.28086-RA/Caur.EVM.14666-RA/Caur.EVM.16330-RA/Caur.EVM.24256-RA/Caur.EVM.30208-RA/Caur.EVM.10202-RA/Caur.EVM.18599-RA/Caur.EVM.00266-RA/Caur.EVM.08944-RA/Caur.EVM.08884-RA/Caur.EVM.02287-RA/Caur.EVM.18208-RA/Caur.EVM.07669-RA/Caur.EVM.12078-RA/Caur.EVM.33866-RA/Caur.EVM.18515-RA/Cau…	40
GO:0044420	CC	GO:0044420	extracellular matrix component	0.00011165	0.0341443	0.0333609	Caur.EVM.33099-RA/Caur.EVM.35279-RA/Caur.EVM.02455-RA/Caur.EVM.32506-RA/Caur.EVM.00189-RA/Caur.EVM.10992-RA/Caur.EVM.36398-RA/Caur.EVM.04744-RA/Caur.EVM.25437-RA/Caur.EVM.31951-RA/Caur.EVM.26196-RA/Caur.EVM.19780-RA/Caur.EVM.23824-RA/Caur.EVM.15058-RA/Caur.EVM.28344-RA/Caur.EVM.26403-RA/Caur.EVM.04745-RA/Caur.EVM.26732-RA/Caur.EVM.24708-RA/Caur.EVM.33747-RA/Caur.EVM.13437-RA/Caur.EVM.24334-RA	22
GO:0005604	CC	GO:0005604	basement membrane	0.000197686	0.0341443	0.0333609	Caur.EVM.33099-RA/Caur.EVM.00189-RA/Caur.EVM.10992-RA/Caur.EVM.36398-RA/Caur.EVM.04744-RA/Caur.EVM.25437-RA/Caur.EVM.31951-RA/Caur.EVM.26196-RA/Caur.EVM.19780-RA/Caur.EVM.23824-RA/Caur.EVM.15058-RA/Caur.EVM.28344-RA/Caur.EVM.04745-RA/Caur.EVM.26732-RA/Caur.EVM.13437-RA/Caur.EVM.24334-RA	16
GO:0044421	CC	GO:0044421	extracellular region part	0.00037233	0.0341443	0.0333609	Caur.EVM.33099-RA/Caur.EVM.35728-RA/Caur.EVM.35279-RA/Caur.EVM.22242-RA/Caur.EVM.18525-RA/Caur.EVM.30114-RA/Caur.EVM.02455-RA/Caur.EVM.31278-RA/Caur.EVM.32506-RA/Caur.EVM.00189-RA/Caur.EVM.10992-RA/Caur.EVM.29479-RA/Caur.EVM.30208-RA/Caur.EVM.00531-RA/Caur.EVM.24052-RA/Caur.EVM.10070-RA/Caur.EVM.30130-RA/Caur.EVM.36398-RA/Caur.EVM.30195-RA/Caur.EVM.05194-RA/Caur.EVM.04744-RA/Caur.EVM.27129-RA/Cau…	67
GO:0062023	CC	GO:0062023	collagen-containing extracellular matrix	0.00037399	0.0341443	0.0333609	Caur.EVM.33099-RA/Caur.EVM.35279-RA/Caur.EVM.02455-RA/Caur.EVM.32506-RA/Caur.EVM.00189-RA/Caur.EVM.10992-RA/Caur.EVM.36398-RA/Caur.EVM.04744-RA/Caur.EVM.25437-RA/Caur.EVM.31951-RA/Caur.EVM.26196-RA/Caur.EVM.19780-RA/Caur.EVM.23824-RA/Caur.EVM.15058-RA/Caur.EVM.28344-RA/Caur.EVM.26403-RA/Caur.EVM.04745-RA/Caur.EVM.26732-RA/Caur.EVM.33747-RA/Caur.EVM.13437-RA/Caur.EVM.24334-RA	21
GO:0031012	CC	GO:0031012	extracellular matrix	0.000437747	0.0341443	0.0333609	Caur.EVM.33099-RA/Caur.EVM.35279-RA/Caur.EVM.18525-RA/Caur.EVM.30114-RA/Caur.EVM.02455-RA/Caur.EVM.32506-RA/Caur.EVM.00189-RA/Caur.EVM.10992-RA/Caur.EVM.36398-RA/Caur.EVM.30195-RA/Caur.EVM.05194-RA/Caur.EVM.04744-RA/Caur.EVM.25437-RA/Caur.EVM.31951-RA/Caur.EVM.26196-RA/Caur.EVM.14272-RA/Caur.EVM.19780-RA/Caur.EVM.23824-RA/Caur.EVM.15058-RA/Caur.EVM.09317-RA/Caur.EVM.33181-RA/Caur.EVM.32138-RA/Cau…	40
GO:0005788	CC	GO:0005788	endoplasmic reticulum lumen	0.0014115	0.0917477	0.0896428	Caur.EVM.33099-RA/Caur.EVM.35279-RA/Caur.EVM.09519-RA/Caur.EVM.02455-RA/Caur.EVM.32506-RA/Caur.EVM.04744-RA/Caur.EVM.31951-RA/Caur.EVM.23824-RA/Caur.EVM.34006-RA/Caur.EVM.30995-RA/Caur.EVM.06644-RA/Caur.EVM.15058-RA/Caur.EVM.28344-RA/Caur.EVM.26403-RA/Caur.EVM.26732-RA/Caur.EVM.33747-RA/Caur.EVM.38524-RA/Caur.EVM.13437-RA/Caur.EVM.24334-RA	19
GO:0005581	CC	GO:0005581	collagen trimer	0.00168621	0.0939461	0.0917908	Caur.EVM.33099-RA/Caur.EVM.35279-RA/Caur.EVM.02455-RA/Caur.EVM.32506-RA/Caur.EVM.04744-RA/Caur.EVM.31951-RA/Caur.EVM.23824-RA/Caur.EVM.15058-RA/Caur.EVM.28344-RA/Caur.EVM.26403-RA/Caur.EVM.26732-RA/Caur.EVM.24708-RA/Caur.EVM.33747-RA/Caur.EVM.13437-RA/Caur.EVM.24334-RA	15
GO:0098644	CC	GO:0098644	complex of collagen trimers	0.0024619	0.120018	0.117264	Caur.EVM.33099-RA/Caur.EVM.35279-RA/Caur.EVM.02455-RA/Caur.EVM.32506-RA/Caur.EVM.31951-RA/Caur.EVM.23824-RA/Caur.EVM.15058-RA/Caur.EVM.28344-RA/Caur.EVM.26403-RA/Caur.EVM.26732-RA/Caur.EVM.33747-RA/Caur.EVM.13437-RA/Caur.EVM.24334-RA	13
GO:0099080	CC	GO:0099080	supramolecular complex	0.00349701	0.151537	0.148061	Caur.EVM.33099-RA/Caur.EVM.35279-RA/Caur.EVM.02455-RA/Caur.EVM.31278-RA/Caur.EVM.12028-RA/Caur.EVM.15913-RA/Caur.EVM.32506-RA/Caur.EVM.26204-RA/Caur.EVM.03800-RA/Caur.EVM.10070-RA/Caur.EVM.24785-RA/Caur.EVM.32869-RA/Caur.EVM.03296-RA/Caur.EVM.31951-RA/Caur.EVM.38393-RA/Caur.EVM.06422-RA/Caur.EVM.19674-RA/Caur.EVM.23824-RA/Caur.EVM.24337-RA/Caur.EVM.17863-RA/Caur.EVM.05257-RA/Caur.EVM.09856-RA/Cau…	45
GO:0061702	CC	GO:0061702	inflammasome complex	0.00745198	0.238165	0.232701	Caur.EVM.35947-RA/Caur.EVM.09543-RA/Caur.EVM.32721-RA/Caur.EVM.30598-RA/Caur.EVM.22561-RA/Caur.EVM.01523-RA/Caur.EVM.38308-RA/Caur.EVM.04137-RA/Caur.EVM.36804-RA	9
GO:0070062	CC	GO:0070062	extracellular exosome	0.00745198	0.238165	0.232701	Caur.EVM.35728-RA/Caur.EVM.31278-RA/Caur.EVM.30208-RA/Caur.EVM.10070-RA/Caur.EVM.17863-RA/Caur.EVM.10059-RA/Caur.EVM.22962-RA/Caur.EVM.09856-RA/Caur.EVM.18596-RA	9
GO:1903561	CC	GO:1903561	extracellular vesicle	0.00745198	0.238165	0.232701	Caur.EVM.35728-RA/Caur.EVM.31278-RA/Caur.EVM.30208-RA/Caur.EVM.10070-RA/Caur.EVM.17863-RA/Caur.EVM.10059-RA/Caur.EVM.22962-RA/Caur.EVM.09856-RA/Caur.EVM.18596-RA	9
GO:0099081	CC	GO:0099081	supramolecular polymer	0.00793882	0.238165	0.232701	Caur.EVM.33099-RA/Caur.EVM.35279-RA/Caur.EVM.02455-RA/Caur.EVM.31278-RA/Caur.EVM.12028-RA/Caur.EVM.15913-RA/Caur.EVM.32506-RA/Caur.EVM.26204-RA/Caur.EVM.03800-RA/Caur.EVM.10070-RA/Caur.EVM.24785-RA/Caur.EVM.32869-RA/Caur.EVM.03296-RA/Caur.EVM.38393-RA/Caur.EVM.06422-RA/Caur.EVM.19674-RA/Caur.EVM.23824-RA/Caur.EVM.24337-RA/Caur.EVM.17863-RA/Caur.EVM.05257-RA/Caur.EVM.09856-RA/Caur.EVM.16183-RA/Cau…	43
GO:0043230	CC	GO:0043230	extracellular organelle	0.0110316	0.286808	0.280228	Caur.EVM.35728-RA/Caur.EVM.31278-RA/Caur.EVM.30208-RA/Caur.EVM.10070-RA/Caur.EVM.17863-RA/Caur.EVM.10059-RA/Caur.EVM.22962-RA/Caur.EVM.09856-RA/Caur.EVM.18596-RA	9
GO:0065010	CC	GO:0065010	extracellular membrane-bounded organelle	0.0110316	0.286808	0.280228	Caur.EVM.35728-RA/Caur.EVM.31278-RA/Caur.EVM.30208-RA/Caur.EVM.10070-RA/Caur.EVM.17863-RA/Caur.EVM.10059-RA/Caur.EVM.22962-RA/Caur.EVM.09856-RA/Caur.EVM.18596-RA	9
GO:0072559	CC	GO:0072559	NLRP3 inflammasome complex	0.0117665	0.286808	0.280228	Caur.EVM.09543-RA/Caur.EVM.30598-RA/Caur.EVM.22561-RA/Caur.EVM.01523-RA/Caur.EVM.38308-RA	5
GO:0001533	CC	GO:0001533	cornified envelope	0.0225963	0.518385	0.506492	Caur.EVM.16692-RA/Caur.EVM.38537-RA/Caur.EVM.04284-RA/Caur.EVM.16691-RA	4
GO:0099512	CC	GO:0099512	supramolecular fiber	0.0279725	0.538926	0.526562	Caur.EVM.35279-RA/Caur.EVM.02455-RA/Caur.EVM.31278-RA/Caur.EVM.12028-RA/Caur.EVM.15913-RA/Caur.EVM.32506-RA/Caur.EVM.26204-RA/Caur.EVM.03800-RA/Caur.EVM.10070-RA/Caur.EVM.24785-RA/Caur.EVM.32869-RA/Caur.EVM.03296-RA/Caur.EVM.38393-RA/Caur.EVM.06422-RA/Caur.EVM.19674-RA/Caur.EVM.24337-RA/Caur.EVM.17863-RA/Caur.EVM.05257-RA/Caur.EVM.09856-RA/Caur.EVM.16183-RA/Caur.EVM.33295-RA/Caur.EVM.11568-RA/Cau…	38
GO:0009986	CC	GO:0009986	cell surface	0.0336994	0.538926	0.526562	Caur.EVM.35728-RA/Caur.EVM.15363-RA/Caur.EVM.23563-RA/Caur.EVM.22242-RA/Caur.EVM.18525-RA/Caur.EVM.01902-RA/Caur.EVM.10641-RA/Caur.EVM.29437-RA/Caur.EVM.11842-RA/Caur.EVM.08944-RA/Caur.EVM.30195-RA/Caur.EVM.32715-RA/Caur.EVM.23664-RA/Caur.EVM.34903-RA/Caur.EVM.30547-RA/Caur.EVM.20235-RA/Caur.EVM.32726-RA/Caur.EVM.29103-RA/Caur.EVM.06644-RA/Caur.EVM.28009-RA/Caur.EVM.21878-RA/Caur.EVM.27073-RA/Cau…	31
GO:0030935	CC	GO:0030935	sheet-forming collagen trimer	0.0352485	0.538926	0.526562	Caur.EVM.33099-RA/Caur.EVM.23824-RA/Caur.EVM.26732-RA/Caur.EVM.13437-RA/Caur.EVM.24334-RA	5
GO:0032587	CC	GO:0032587	ruffle membrane	0.0352485	0.538926	0.526562	Caur.EVM.19867-RA/Caur.EVM.27073-RA/Caur.EVM.06565-RA/Caur.EVM.27880-RA/Caur.EVM.15945-RA	5
GO:0098642	CC	GO:0098642	network-forming collagen trimer	0.0352485	0.538926	0.526562	Caur.EVM.33099-RA/Caur.EVM.23824-RA/Caur.EVM.26732-RA/Caur.EVM.13437-RA/Caur.EVM.24334-RA	5
GO:0098645	CC	GO:0098645	collagen network	0.0352485	0.538926	0.526562	Caur.EVM.33099-RA/Caur.EVM.23824-RA/Caur.EVM.26732-RA/Caur.EVM.13437-RA/Caur.EVM.24334-RA	5
GO:0098646	CC	GO:0098646	collagen sheet	0.0352485	0.538926	0.526562	Caur.EVM.33099-RA/Caur.EVM.23824-RA/Caur.EVM.26732-RA/Caur.EVM.13437-RA/Caur.EVM.24334-RA	5
GO:0098651	CC	GO:0098651	basement membrane collagen trimer	0.0352485	0.538926	0.526562	Caur.EVM.33099-RA/Caur.EVM.23824-RA/Caur.EVM.26732-RA/Caur.EVM.13437-RA/Caur.EVM.24334-RA	5
GO:0044449	CC	GO:0044449	contractile fiber part	0.0359284	0.538926	0.526562	Caur.EVM.31278-RA/Caur.EVM.15913-RA/Caur.EVM.10070-RA/Caur.EVM.24785-RA/Caur.EVM.32869-RA/Caur.EVM.24337-RA/Caur.EVM.17863-RA/Caur.EVM.05257-RA/Caur.EVM.09856-RA/Caur.EVM.16183-RA/Caur.EVM.33295-RA/Caur.EVM.11568-RA/Caur.EVM.29905-RA/Caur.EVM.34355-RA/Caur.EVM.22825-RA/Caur.EVM.36443-RA/Caur.EVM.16378-RA/Caur.EVM.18596-RA/Caur.EVM.27633-RA	19
GO:0005615	CC	GO:0005615	extracellular space	0.0407109	0.588047	0.574556	Caur.EVM.35728-RA/Caur.EVM.35279-RA/Caur.EVM.22242-RA/Caur.EVM.02455-RA/Caur.EVM.31278-RA/Caur.EVM.32506-RA/Caur.EVM.29479-RA/Caur.EVM.30208-RA/Caur.EVM.00531-RA/Caur.EVM.24052-RA/Caur.EVM.10070-RA/Caur.EVM.30130-RA/Caur.EVM.30195-RA/Caur.EVM.05194-RA/Caur.EVM.04744-RA/Caur.EVM.27129-RA/Caur.EVM.14930-RA/Caur.EVM.03862-RA/Caur.EVM.17863-RA/Caur.EVM.10059-RA/Caur.EVM.22962-RA/Caur.EVM.09856-RA/Cau…	36
GO:0044295	CC	GO:0044295	axonal growth cone	0.0437905	0.609939	0.595945	Caur.EVM.23563-RA/Caur.EVM.03800-RA/Caur.EVM.32715-RA/Caur.EVM.33370-RA/Caur.EVM.30787-RA	5
GO:0070300	MF	GO:0070300	phosphatidic acid binding	7.9825e-20	3.87151e-17	3.8316e-17	Caur.EVM.17967-RA/Caur.EVM.14774-RA/Caur.EVM.04727-RA/Caur.EVM.06031-RA/Caur.EVM.10643-RA/Caur.EVM.32963-RA/Caur.EVM.17966-RA/Caur.EVM.29282-RA/Caur.EVM.16373-RA/Caur.EVM.03065-RA/Caur.EVM.02446-RA/Caur.EVM.05317-RA/Caur.EVM.06048-RA/Caur.EVM.16126-RA/Caur.EVM.14301-RA/Caur.EVM.08561-RA/Caur.EVM.17139-RA/Caur.EVM.07844-RA/Caur.EVM.22424-RA/Caur.EVM.14858-RA/Caur.EVM.03068-RA/Caur.EVM.13351-RA/Cau…	34
GO:0005543	MF	GO:0005543	phospholipid binding	2.21773e-08	5.37799e-06	5.32255e-06	Caur.EVM.05788-RA/Caur.EVM.17967-RA/Caur.EVM.14774-RA/Caur.EVM.04727-RA/Caur.EVM.06031-RA/Caur.EVM.10643-RA/Caur.EVM.32963-RA/Caur.EVM.17966-RA/Caur.EVM.29282-RA/Caur.EVM.16373-RA/Caur.EVM.03065-RA/Caur.EVM.02446-RA/Caur.EVM.05317-RA/Caur.EVM.06048-RA/Caur.EVM.16126-RA/Caur.EVM.14301-RA/Caur.EVM.08561-RA/Caur.EVM.17139-RA/Caur.EVM.07844-RA/Caur.EVM.22424-RA/Caur.EVM.14858-RA/Caur.EVM.03068-RA/Cau…	40
GO:0004672	MF	GO:0004672	protein kinase activity	5.68512e-07	9.19095e-05	9.09619e-05	Caur.EVM.17967-RA/Caur.EVM.14774-RA/Caur.EVM.04727-RA/Caur.EVM.06031-RA/Caur.EVM.10643-RA/Caur.EVM.32963-RA/Caur.EVM.17966-RA/Caur.EVM.29282-RA/Caur.EVM.16373-RA/Caur.EVM.03065-RA/Caur.EVM.02446-RA/Caur.EVM.05317-RA/Caur.EVM.06048-RA/Caur.EVM.16126-RA/Caur.EVM.14301-RA/Caur.EVM.08561-RA/Caur.EVM.17139-RA/Caur.EVM.07844-RA/Caur.EVM.26054-RA/Caur.EVM.22424-RA/Caur.EVM.14858-RA/Caur.EVM.03068-RA/Cau…	59
GO:0016773	MF	GO:0016773	phosphotransferase activity, alcohol group as acceptor	1.0025e-05	0.00104526	0.00103449	Caur.EVM.17967-RA/Caur.EVM.14774-RA/Caur.EVM.04727-RA/Caur.EVM.06031-RA/Caur.EVM.10643-RA/Caur.EVM.32963-RA/Caur.EVM.17966-RA/Caur.EVM.29282-RA/Caur.EVM.16373-RA/Caur.EVM.03065-RA/Caur.EVM.30810-RA/Caur.EVM.02446-RA/Caur.EVM.05317-RA/Caur.EVM.06048-RA/Caur.EVM.16126-RA/Caur.EVM.14301-RA/Caur.EVM.08561-RA/Caur.EVM.17139-RA/Caur.EVM.07844-RA/Caur.EVM.26054-RA/Caur.EVM.22424-RA/Caur.EVM.14858-RA/Cau…	61
GO:0008289	MF	GO:0008289	lipid binding	1.07759e-05	0.00104526	0.00103449	Caur.EVM.05788-RA/Caur.EVM.17967-RA/Caur.EVM.14774-RA/Caur.EVM.04727-RA/Caur.EVM.06031-RA/Caur.EVM.10643-RA/Caur.EVM.32963-RA/Caur.EVM.17966-RA/Caur.EVM.29282-RA/Caur.EVM.16373-RA/Caur.EVM.03065-RA/Caur.EVM.06038-RA/Caur.EVM.02446-RA/Caur.EVM.05317-RA/Caur.EVM.06048-RA/Caur.EVM.16126-RA/Caur.EVM.14301-RA/Caur.EVM.08561-RA/Caur.EVM.17139-RA/Caur.EVM.07844-RA/Caur.EVM.30130-RA/Caur.EVM.22424-RA/Cau…	45
GO:0016301	MF	GO:0016301	kinase activity	6.19967e-05	0.0050114	0.00495973	Caur.EVM.17967-RA/Caur.EVM.14774-RA/Caur.EVM.04727-RA/Caur.EVM.06031-RA/Caur.EVM.10643-RA/Caur.EVM.32963-RA/Caur.EVM.17966-RA/Caur.EVM.29282-RA/Caur.EVM.16373-RA/Caur.EVM.03065-RA/Caur.EVM.30810-RA/Caur.EVM.02446-RA/Caur.EVM.05317-RA/Caur.EVM.06048-RA/Caur.EVM.16126-RA/Caur.EVM.14301-RA/Caur.EVM.08561-RA/Caur.EVM.17139-RA/Caur.EVM.07844-RA/Caur.EVM.26054-RA/Caur.EVM.22424-RA/Caur.EVM.14858-RA/Cau…	62
GO:0004714	MF	GO:0004714	transmembrane receptor protein tyrosine kinase activity	0.000590402	0.0409064	0.0404847	Caur.EVM.33071-RA/Caur.EVM.26764-RA/Caur.EVM.21119-RA/Caur.EVM.34339-RA/Caur.EVM.33718-RA/Caur.EVM.06565-RA/Caur.EVM.05864-RA/Caur.EVM.11769-RA/Caur.EVM.01736-RA/Caur.EVM.19788-RA/Caur.EVM.11727-RA	11
GO:0005044	MF	GO:0005044	scavenger receptor activity	0.00137202	0.0765475	0.0757583	Caur.EVM.01902-RA/Caur.EVM.10641-RA/Caur.EVM.23664-RA/Caur.EVM.32726-RA/Caur.EVM.21878-RA/Caur.EVM.23529-RA/Caur.EVM.32138-RA/Caur.EVM.20423-RA/Caur.EVM.28440-RA/Caur.EVM.08133-RA	10
GO:0016772	MF	GO:0016772	transferase activity, transferring phosphorus-containing groups	0.00142047	0.0765475	0.0757583	Caur.EVM.17967-RA/Caur.EVM.14774-RA/Caur.EVM.04727-RA/Caur.EVM.06031-RA/Caur.EVM.10643-RA/Caur.EVM.32963-RA/Caur.EVM.17966-RA/Caur.EVM.29282-RA/Caur.EVM.16373-RA/Caur.EVM.03065-RA/Caur.EVM.30810-RA/Caur.EVM.02446-RA/Caur.EVM.05317-RA/Caur.EVM.06048-RA/Caur.EVM.16126-RA/Caur.EVM.14301-RA/Caur.EVM.08561-RA/Caur.EVM.17139-RA/Caur.EVM.07844-RA/Caur.EVM.26054-RA/Caur.EVM.22424-RA/Caur.EVM.14858-RA/Cau…	62
GO:0038024	MF	GO:0038024	cargo receptor activity	0.00306716	0.148757	0.147224	Caur.EVM.01902-RA/Caur.EVM.10641-RA/Caur.EVM.23664-RA/Caur.EVM.32726-RA/Caur.EVM.21878-RA/Caur.EVM.23529-RA/Caur.EVM.32138-RA/Caur.EVM.20423-RA/Caur.EVM.28440-RA/Caur.EVM.08133-RA	10
GO:0019199	MF	GO:0019199	transmembrane receptor protein kinase activity	0.00399885	0.176313	0.174495	Caur.EVM.34451-RA/Caur.EVM.33071-RA/Caur.EVM.26764-RA/Caur.EVM.21119-RA/Caur.EVM.34339-RA/Caur.EVM.33718-RA/Caur.EVM.06565-RA/Caur.EVM.05864-RA/Caur.EVM.11769-RA/Caur.EVM.01736-RA/Caur.EVM.19788-RA/Caur.EVM.11727-RA	12
GO:0042834	MF	GO:0042834	peptidoglycan binding	0.00516808	0.208877	0.206723	Caur.EVM.09543-RA/Caur.EVM.30598-RA/Caur.EVM.22561-RA/Caur.EVM.01523-RA/Caur.EVM.38308-RA	5
GO:0004713	MF	GO:0004713	protein tyrosine kinase activity	0.0058559	0.209948	0.207784	Caur.EVM.33071-RA/Caur.EVM.26764-RA/Caur.EVM.21119-RA/Caur.EVM.34339-RA/Caur.EVM.33718-RA/Caur.EVM.06565-RA/Caur.EVM.05864-RA/Caur.EVM.10135-RA/Caur.EVM.11769-RA/Caur.EVM.01736-RA/Caur.EVM.19788-RA/Caur.EVM.11727-RA	12
GO:0005201	MF	GO:0005201	extracellular matrix structural constituent	0.00606037	0.209948	0.207784	Caur.EVM.35279-RA/Caur.EVM.18525-RA/Caur.EVM.02455-RA/Caur.EVM.32506-RA/Caur.EVM.36398-RA/Caur.EVM.30195-RA/Caur.EVM.04744-RA/Caur.EVM.26196-RA/Caur.EVM.15058-RA/Caur.EVM.28344-RA/Caur.EVM.36814-RA/Caur.EVM.26403-RA/Caur.EVM.33747-RA	13
GO:0038023	MF	GO:0038023	signaling receptor activity	0.00710426	0.229704	0.227336	Caur.EVM.00445-RA/Caur.EVM.30842-RA/Caur.EVM.15994-RA/Caur.EVM.06038-RA/Caur.EVM.26050-RA/Caur.EVM.27763-RA/Caur.EVM.14666-RA/Caur.EVM.16330-RA/Caur.EVM.09926-RA/Caur.EVM.29437-RA/Caur.EVM.18599-RA/Caur.EVM.20950-RA/Caur.EVM.16513-RA/Caur.EVM.16485-RA/Caur.EVM.14226-RA/Caur.EVM.00266-RA/Caur.EVM.33927-RA/Caur.EVM.12009-RA/Caur.EVM.13653-RA/Caur.EVM.34451-RA/Caur.EVM.27129-RA/Caur.EVM.33071-RA/Cau…	64
GO:0016504	MF	GO:0016504	peptidase activator activity	0.0127441	0.386306	0.382323	Caur.EVM.09543-RA/Caur.EVM.30598-RA/Caur.EVM.22561-RA/Caur.EVM.01523-RA/Caur.EVM.38308-RA/Caur.EVM.26709-RA	6
GO:0052689	MF	GO:0052689	carboxylic ester hydrolase activity	0.0158322	0.425751	0.421361	Caur.EVM.05852-RA/Caur.EVM.19867-RA/Caur.EVM.33866-RA/Caur.EVM.30995-RA/Caur.EVM.21860-RA/Caur.EVM.27880-RA/Caur.EVM.15945-RA	7
GO:0008656	MF	GO:0008656	cysteine-type endopeptidase activator activity involved in apoptotic process	0.0166789	0.425751	0.421361	Caur.EVM.09543-RA/Caur.EVM.30598-RA/Caur.EVM.22561-RA/Caur.EVM.01523-RA/Caur.EVM.38308-RA	5
GO:0016505	MF	GO:0016505	peptidase activator activity involved in apoptotic process	0.0166789	0.425751	0.421361	Caur.EVM.09543-RA/Caur.EVM.30598-RA/Caur.EVM.22561-RA/Caur.EVM.01523-RA/Caur.EVM.38308-RA	5
GO:0043028	MF	GO:0043028	cysteine-type endopeptidase regulator activity involved in apoptotic process	0.0176346	0.427639	0.423231	Caur.EVM.09543-RA/Caur.EVM.30598-RA/Caur.EVM.22561-RA/Caur.EVM.01523-RA/Caur.EVM.38308-RA/Caur.EVM.34166-RA/Caur.EVM.30544-RA/Caur.EVM.36949-RA	8
GO:0043395	MF	GO:0043395	heparan sulfate proteoglycan binding	0.0209835	0.480164	0.475214	Caur.EVM.01630-RA/Caur.EVM.28051-RA/Caur.EVM.15058-RA/Caur.EVM.28344-RA	4
GO:0004620	MF	GO:0004620	phospholipase activity	0.0217806	0.480164	0.475214	Caur.EVM.05852-RA/Caur.EVM.19867-RA/Caur.EVM.33866-RA/Caur.EVM.21860-RA/Caur.EVM.27880-RA/Caur.EVM.15945-RA	6
GO:0005539	MF	GO:0005539	glycosaminoglycan binding	0.0271667	0.572862	0.566956	Caur.EVM.22242-RA/Caur.EVM.09543-RA/Caur.EVM.30598-RA/Caur.EVM.22561-RA/Caur.EVM.01523-RA/Caur.EVM.38308-RA/Caur.EVM.34339-RA/Caur.EVM.15058-RA/Caur.EVM.33718-RA/Caur.EVM.28344-RA/Caur.EVM.26709-RA/Caur.EVM.05864-RA	12
GO:0005217	MF	GO:0005217	intracellular ligand-gated ion channel activity	0.036092	0.729359	0.72184	Caur.EVM.01300-RA/Caur.EVM.15913-RA/Caur.EVM.30208-RA/Caur.EVM.30078-RA/Caur.EVM.02287-RA/Caur.EVM.34735-RA/Caur.EVM.33241-RA	7
GO:0016755	MF	GO:0016755	transferase activity, transferring amino-acyl groups	0.0385184	0.736793	0.729198	Caur.EVM.16692-RA/Caur.EVM.38537-RA/Caur.EVM.04284-RA/Caur.EVM.02889-RA/Caur.EVM.16691-RA	5
GO:0005221	MF	GO:0005221	intracellular cyclic nucleotide activated cation channel activity	0.0410174	0.736793	0.729198	Caur.EVM.01300-RA/Caur.EVM.30208-RA/Caur.EVM.30078-RA/Caur.EVM.02287-RA	4
GO:0043394	MF	GO:0043394	proteoglycan binding	0.0410174	0.736793	0.729198	Caur.EVM.01630-RA/Caur.EVM.28051-RA/Caur.EVM.15058-RA/Caur.EVM.28344-RA	4
GO:0019838	MF	GO:0019838	growth factor binding	0.0437655	0.758081	0.750265	Caur.EVM.35279-RA/Caur.EVM.02455-RA/Caur.EVM.32506-RA/Caur.EVM.14733-RA/Caur.EVM.34451-RA/Caur.EVM.29103-RA/Caur.EVM.34339-RA/Caur.EVM.15058-RA/Caur.EVM.33718-RA/Caur.EVM.28344-RA/Caur.EVM.15456-RA/Caur.EVM.33747-RA	12
GO:0004888	MF	GO:0004888	transmembrane signaling receptor activity	0.0456096	0.762781	0.754917	Caur.EVM.00445-RA/Caur.EVM.27763-RA/Caur.EVM.14666-RA/Caur.EVM.16330-RA/Caur.EVM.09926-RA/Caur.EVM.18599-RA/Caur.EVM.16485-RA/Caur.EVM.00266-RA/Caur.EVM.12009-RA/Caur.EVM.13653-RA/Caur.EVM.34451-RA/Caur.EVM.27129-RA/Caur.EVM.33071-RA/Caur.EVM.26764-RA/Caur.EVM.30547-RA/Caur.EVM.00520-RA/Caur.EVM.29103-RA/Caur.EVM.03283-RA/Caur.EVM.18515-RA/Caur.EVM.00055-RA/Caur.EVM.21119-RA/Caur.EVM.31380-RA/Cau…	46
