# Supplementary material for: Formation of autotriploid Carassius auratus and its fertility-related genes analysis
Source: Research Square preprint supplement (doi:10.21203/rs.3.rs-397574/v1), 2021-04-13
Supplement: Supplementary file 10 [file c710cfc2fbfd186c1169b6af.docx]

| Sample name | RIN | 28S/18S | OD260/280 | QC  Evaluation | Amount  (µg) |
| --- | --- | --- | --- | --- | --- |
| FRCC-1 | 8.3 | 2.0 | 2.1 | A | 55.2 |
| FRCC-2 | 8.1 | 2.1 | 2.1 | A | 46.3 |
| FRCC-3 | 8.1 | 2.0 | 2.1 | A | 39.4 |
| M4nRR-1 | 8.2 | 2.1 | 2.1 | A | 43.2 |
| M4nRR-2 | 8.6 | 2.2 | 2.1 | A | 28.3 |
| M4nRR-3 | 8.0 | 2.0 | 2.1 | A | 41.8 |
| F3nRR-1` | 8.3 | 2.4 | 2.1 | A | 72.1 |
| F3nRR-2 | 8.2 | 2.0 | 2.1 | A | 44.9 |
| F3nRR-3 | 8.3 | 2.0 | 2.1 | A | 36.4 |
| M3nRR-1 | 8.8 | 2.3 | 2.1 | A | 20.3 |

Additional file 1: Table S1. Quality test results of RNA.
