# Supplementary material for: Formation of autotriploid Carassius auratus and its fertility-related genes analysis
Source: Research Square preprint supplement (doi:10.21203/rs.3.rs-397574/v1), 2021-04-13
Supplement: Supplementary file 11 [file f517b97377f1d9511446999b.xlsx]

## Sheet: Sheet1
Additional file 5: Table S5. Gene classification based on Kyoto Encyclopedia of Genes and Genomes (KEGG) for DEGs in M3nRR vs M4nRR
	ID	Description	GeneRatio	BgRatio	pvalue	p.adjust	qvalue	geneID	Count
ko04075	ko04075	Plant hormone signal transduction	30/1717	44/17241	2.00143e-20	7.60543e-18	6.69952e-18	Caur.EVM.17967-RA/Caur.EVM.14774-RA/Caur.EVM.04727-RA/Caur.EVM.06031-RA/Caur.EVM.10643-RA/Caur.EVM.32963-RA/Caur.EVM.17966-RA/Caur.EVM.29282-RA/Caur.EVM.16373-RA/Caur.EVM.03065-RA/Caur.EVM.02446-RA/Caur.EVM.05317-RA/Caur.EVM.06048-RA/Caur.EVM.16126-RA/Caur.EVM.14301-RA/Caur.EVM.08561-RA/Caur.EVM.17139-RA/Caur.EVM.07844-RA/Caur.EVM.22424-RA/Caur.EVM.14858-RA/Caur.EVM.03068-RA/Caur.EVM.13351-RA/Cau…	30
ko04016	ko04016	MAPK signaling pathway - plant	35/1717	66/17241	1.8344e-18	3.48535e-16	3.0702e-16	Caur.EVM.17967-RA/Caur.EVM.14774-RA/Caur.EVM.04727-RA/Caur.EVM.06031-RA/Caur.EVM.10643-RA/Caur.EVM.32963-RA/Caur.EVM.17966-RA/Caur.EVM.29282-RA/Caur.EVM.16373-RA/Caur.EVM.03065-RA/Caur.EVM.02446-RA/Caur.EVM.05317-RA/Caur.EVM.06048-RA/Caur.EVM.16126-RA/Caur.EVM.14301-RA/Caur.EVM.08561-RA/Caur.EVM.17139-RA/Caur.EVM.07844-RA/Caur.EVM.22424-RA/Caur.EVM.14858-RA/Caur.EVM.03068-RA/Caur.EVM.13351-RA/Cau…	35
ko05322	ko05322	Systemic lupus erythematosus	53/1717	205/17241	4.74364e-11	6.00861e-09	5.2929e-09	Caur.EVM.22242-RA/Caur.EVM.31681-RA/Caur.EVM.07822-RA/Caur.EVM.24801-RA/Caur.EVM.30987-RA/Caur.EVM.06008-RA/Caur.EVM.31805-RA/Caur.EVM.24200-RA/Caur.EVM.30977-RA/Caur.EVM.32254-RA/Caur.EVM.30981-RA/Caur.EVM.25032-RA/Caur.EVM.30988-RA/Caur.EVM.23491-RA/Caur.EVM.32262-RA/Caur.EVM.18668-RA/Caur.EVM.31804-RA/Caur.EVM.30961-RA/Caur.EVM.30985-RA/Caur.EVM.04877-RA/Caur.EVM.04879-RA/Caur.EVM.32268-RA/Cau…	53
ko05034	ko05034	Alcoholism	62/1717	309/17241	5.8114e-08	5.52083e-06	4.86323e-06	Caur.EVM.31681-RA/Caur.EVM.26350-RA/Caur.EVM.18965-RA/Caur.EVM.07822-RA/Caur.EVM.13170-RA/Caur.EVM.30987-RA/Caur.EVM.06008-RA/Caur.EVM.31805-RA/Caur.EVM.30977-RA/Caur.EVM.32254-RA/Caur.EVM.30981-RA/Caur.EVM.25032-RA/Caur.EVM.30988-RA/Caur.EVM.23491-RA/Caur.EVM.08498-RA/Caur.EVM.32262-RA/Caur.EVM.36613-RA/Caur.EVM.31804-RA/Caur.EVM.33045-RA/Caur.EVM.07103-RA/Caur.EVM.30961-RA/Caur.EVM.30985-RA/Cau…	62
ko04915	ko04915	Estrogen signaling pathway	44/1717	254/17241	0.000189309	0.0136243	0.0120014	Caur.EVM.22351-RA/Caur.EVM.35728-RA/Caur.EVM.19593-RA/Caur.EVM.10083-RA/Caur.EVM.30002-RA/Caur.EVM.29574-RA/Caur.EVM.09190-RA/Caur.EVM.24155-RA/Caur.EVM.03944-RA/Caur.EVM.26350-RA/Caur.EVM.30810-RA/Caur.EVM.06038-RA/Caur.EVM.02541-RA/Caur.EVM.03180-RA/Caur.EVM.10093-RA/Caur.EVM.24385-RA/Caur.EVM.32865-RA/Caur.EVM.18072-RA/Caur.EVM.18431-RA/Caur.EVM.17245-RA/Caur.EVM.13170-RA/Caur.EVM.38172-RA/Cau…	44
ko04015	ko04015	Rap1 signaling pathway	66/1717	428/17241	0.00021512	0.0136243	0.0120014	Caur.EVM.10083-RA/Caur.EVM.09190-RA/Caur.EVM.24155-RA/Caur.EVM.31681-RA/Caur.EVM.30810-RA/Caur.EVM.05442-RA/Caur.EVM.10093-RA/Caur.EVM.10688-RA/Caur.EVM.14329-RA/Caur.EVM.05826-RA/Caur.EVM.38172-RA/Caur.EVM.07868-RA/Caur.EVM.24636-RA/Caur.EVM.17558-RA/Caur.EVM.21623-RA/Caur.EVM.13653-RA/Caur.EVM.09689-RA/Caur.EVM.33071-RA/Caur.EVM.18612-RA/Caur.EVM.32175-RA/Caur.EVM.29357-RA/Caur.EVM.26764-RA/Cau…	66
ko05033	ko05033	Nicotine addiction	21/1717	99/17241	0.000641148	0.0244337	0.0215233	Caur.EVM.18611-RA/Caur.EVM.14330-RA/Caur.EVM.09522-RA/Caur.EVM.31681-RA/Caur.EVM.37174-RA/Caur.EVM.36613-RA/Caur.EVM.12961-RA/Caur.EVM.16908-RA/Caur.EVM.34843-RA/Caur.EVM.02066-RA/Caur.EVM.05346-RA/Caur.EVM.39085-RA/Caur.EVM.06407-RA/Caur.EVM.12133-RA/Caur.EVM.05393-RA/Caur.EVM.23376-RA/Caur.EVM.11354-RA/Caur.EVM.22293-RA/Caur.EVM.00263-RA/Caur.EVM.15202-RA/Caur.EVM.03358-RA	21
ko04040	ko04040	Ion channels [BR:ko04040]	71/1717	487/17241	0.000664762	0.0244337	0.0215233	Caur.EVM.01028-RA/Caur.EVM.15363-RA/Caur.EVM.18611-RA/Caur.EVM.14330-RA/Caur.EVM.09522-RA/Caur.EVM.25169-RA/Caur.EVM.31681-RA/Caur.EVM.15913-RA/Caur.EVM.29608-RA/Caur.EVM.00365-RA/Caur.EVM.02323-RA/Caur.EVM.09926-RA/Caur.EVM.36659-RA/Caur.EVM.06556-RA/Caur.EVM.21898-RA/Caur.EVM.37174-RA/Caur.EVM.09096-RA/Caur.EVM.07372-RA/Caur.EVM.02287-RA/Caur.EVM.25132-RA/Caur.EVM.09845-RA/Caur.EVM.22883-RA/Cau…	71
ko04514	ko04514	Cell adhesion molecules (CAMs)	40/1717	239/17241	0.000735026	0.0244337	0.0215233	Caur.EVM.00445-RA/Caur.EVM.36406-RA/Caur.EVM.29488-RA/Caur.EVM.00999-RA/Caur.EVM.16330-RA/Caur.EVM.16688-RA/Caur.EVM.39161-RA/Caur.EVM.03622-RA/Caur.EVM.24801-RA/Caur.EVM.36409-RA/Caur.EVM.29437-RA/Caur.EVM.36407-RA/Caur.EVM.13777-RA/Caur.EVM.35912-RA/Caur.EVM.24200-RA/Caur.EVM.09581-RA/Caur.EVM.04654-RA/Caur.EVM.05318-RA/Caur.EVM.11439-RA/Caur.EVM.33989-RA/Caur.EVM.01388-RA/Caur.EVM.18515-RA/Cau…	40
ko04976	ko04976	Bile secretion	25/1717	128/17241	0.000761188	0.0244337	0.0215233	Caur.EVM.16530-RA/Caur.EVM.27873-RA/Caur.EVM.04625-RA/Caur.EVM.12404-RA/Caur.EVM.26350-RA/Caur.EVM.26954-RA/Caur.EVM.34162-RA/Caur.EVM.30208-RA/Caur.EVM.38172-RA/Caur.EVM.31354-RA/Caur.EVM.21623-RA/Caur.EVM.14592-RA/Caur.EVM.31583-RA/Caur.EVM.19753-RA/Caur.EVM.17638-RA/Caur.EVM.27874-RA/Caur.EVM.26263-RA/Caur.EVM.01666-RA/Caur.EVM.13661-RA/Caur.EVM.02701-RA/Caur.EVM.23377-RA/Caur.EVM.16231-RA/Cau…	25
ko03310	ko03310	Nuclear receptors [BR:ko03310]	24/1717	121/17241	0.000765048	0.0244337	0.0215233	Caur.EVM.30842-RA/Caur.EVM.15994-RA/Caur.EVM.06038-RA/Caur.EVM.27802-RA/Caur.EVM.31382-RA/Caur.EVM.32840-RA/Caur.EVM.20950-RA/Caur.EVM.33927-RA/Caur.EVM.30636-RA/Caur.EVM.13618-RA/Caur.EVM.30630-RA/Caur.EVM.19213-RA/Caur.EVM.09505-RA/Caur.EVM.29915-RA/Caur.EVM.16301-RA/Caur.EVM.30888-RA/Caur.EVM.19177-RA/Caur.EVM.11195-RA/Caur.EVM.32141-RA/Caur.EVM.34608-RA/Caur.EVM.38380-RA/Caur.EVM.23577-RA/Cau…	24
ko04360	ko04360	Axon guidance	61/1717	407/17241	0.000771589	0.0244337	0.0215233	Caur.EVM.16300-RA/Caur.EVM.38477-RA/Caur.EVM.12254-RA/Caur.EVM.08398-RA/Caur.EVM.09190-RA/Caur.EVM.24155-RA/Caur.EVM.30810-RA/Caur.EVM.01683-RA/Caur.EVM.16330-RA/Caur.EVM.00365-RA/Caur.EVM.03229-RA/Caur.EVM.10688-RA/Caur.EVM.24523-RA/Caur.EVM.16485-RA/Caur.EVM.06356-RA/Caur.EVM.23311-RA/Caur.EVM.12009-RA/Caur.EVM.10623-RA/Caur.EVM.37981-RA/Caur.EVM.16598-RA/Caur.EVM.33926-RA/Caur.EVM.32175-RA/Cau…	61
ko04014	ko04014	Ras signaling pathway	64/1717	433/17241	0.000838637	0.024514	0.0215941	Caur.EVM.11851-RA/Caur.EVM.28656-RA/Caur.EVM.37500-RA/Caur.EVM.10083-RA/Caur.EVM.09190-RA/Caur.EVM.24155-RA/Caur.EVM.31681-RA/Caur.EVM.26350-RA/Caur.EVM.30810-RA/Caur.EVM.05442-RA/Caur.EVM.09833-RA/Caur.EVM.07468-RA/Caur.EVM.14329-RA/Caur.EVM.24636-RA/Caur.EVM.17558-RA/Caur.EVM.33071-RA/Caur.EVM.18612-RA/Caur.EVM.29357-RA/Caur.EVM.26764-RA/Caur.EVM.13679-RA/Caur.EVM.22692-RA/Caur.EVM.06858-RA/Cau…	64
ko05320	ko05320	Autoimmune thyroid disease	14/1717	56/17241	0.000934029	0.0253522	0.0223324	Caur.EVM.00445-RA/Caur.EVM.16688-RA/Caur.EVM.24801-RA/Caur.EVM.13777-RA/Caur.EVM.24200-RA/Caur.EVM.29746-RA/Caur.EVM.29510-RA/Caur.EVM.28687-RA/Caur.EVM.05507-RA/Caur.EVM.20074-RA/Caur.EVM.20316-RA/Caur.EVM.01936-RA/Caur.EVM.06694-RA/Caur.EVM.08767-RA	14
ko00330	ko00330	Arginine and proline metabolism	19/1717	89/17241	0.00104859	0.0265642	0.0234001	Caur.EVM.15357-RA/Caur.EVM.31663-RA/Caur.EVM.09903-RA/Caur.EVM.14064-RA/Caur.EVM.12356-RA/Caur.EVM.15915-RA/Caur.EVM.05384-RA/Caur.EVM.25094-RA/Caur.EVM.20912-RA/Caur.EVM.04364-RA/Caur.EVM.38411-RA/Caur.EVM.26794-RA/Caur.EVM.27830-RA/Caur.EVM.08056-RA/Caur.EVM.23995-RA/Caur.EVM.20334-RA/Caur.EVM.06260-RA/Caur.EVM.32833-RA/Caur.EVM.13420-RA	19
ko04066	ko04066	HIF-1 signaling pathway	33/1717	193/17241	0.00142089	0.0323396	0.0284876	Caur.EVM.33342-RA/Caur.EVM.29940-RA/Caur.EVM.17428-RA/Caur.EVM.10083-RA/Caur.EVM.12254-RA/Caur.EVM.09190-RA/Caur.EVM.24155-RA/Caur.EVM.26801-RA/Caur.EVM.30810-RA/Caur.EVM.13404-RA/Caur.EVM.26159-RA/Caur.EVM.24636-RA/Caur.EVM.12571-RA/Caur.EVM.21627-RA/Caur.EVM.25901-RA/Caur.EVM.35575-RA/Caur.EVM.02019-RA/Caur.EVM.00385-RA/Caur.EVM.22692-RA/Caur.EVM.06858-RA/Caur.EVM.19395-RA/Caur.EVM.34166-RA/Cau…	33
ko04530	ko04530	Tight junction	47/1717	303/17241	0.00144677	0.0323396	0.0284876	Caur.EVM.07989-RA/Caur.EVM.11851-RA/Caur.EVM.04625-RA/Caur.EVM.28090-RA/Caur.EVM.12028-RA/Caur.EVM.36406-RA/Caur.EVM.00999-RA/Caur.EVM.26350-RA/Caur.EVM.39161-RA/Caur.EVM.34162-RA/Caur.EVM.15226-RA/Caur.EVM.36409-RA/Caur.EVM.10202-RA/Caur.EVM.10688-RA/Caur.EVM.36407-RA/Caur.EVM.05826-RA/Caur.EVM.30702-RA/Caur.EVM.08651-RA/Caur.EVM.18848-RA/Caur.EVM.14703-RA/Caur.EVM.19080-RA/Caur.EVM.16598-RA/Cau…	47
ko04750	ko04750	Inflammatory mediator regulation of TRP channels	31/1717	179/17241	0.00158059	0.033368	0.0293934	Caur.EVM.11851-RA/Caur.EVM.12254-RA/Caur.EVM.09190-RA/Caur.EVM.24155-RA/Caur.EVM.26350-RA/Caur.EVM.30810-RA/Caur.EVM.10093-RA/Caur.EVM.38172-RA/Caur.EVM.21623-RA/Caur.EVM.22692-RA/Caur.EVM.23384-RA/Caur.EVM.16540-RA/Caur.EVM.26263-RA/Caur.EVM.08879-RA/Caur.EVM.36496-RA/Caur.EVM.10307-RA/Caur.EVM.24431-RA/Caur.EVM.26207-RA/Caur.EVM.28196-RA/Caur.EVM.03986-RA/Caur.EVM.03473-RA/Caur.EVM.01107-RA/Cau…	31
ko05202	ko05202	Transcriptional misregulation in cancer	50/1717	334/17241	0.00224841	0.0449683	0.039612	Caur.EVM.33564-RA/Caur.EVM.18934-RA/Caur.EVM.38395-RA/Caur.EVM.01167-RA/Caur.EVM.05442-RA/Caur.EVM.11377-RA/Caur.EVM.07822-RA/Caur.EVM.35718-RA/Caur.EVM.09413-RA/Caur.EVM.24636-RA/Caur.EVM.25519-RA/Caur.EVM.18306-RA/Caur.EVM.32869-RA/Caur.EVM.02290-RA/Caur.EVM.08902-RA/Caur.EVM.24578-RA/Caur.EVM.32262-RA/Caur.EVM.12831-RA/Caur.EVM.34166-RA/Caur.EVM.34661-RA/Caur.EVM.34157-RA/Caur.EVM.05257-RA/Cau…	50
ko04510	ko04510	Focal adhesion	57/1717	395/17241	0.00270634	0.0514204	0.0452955	Caur.EVM.11851-RA/Caur.EVM.35279-RA/Caur.EVM.30734-RA/Caur.EVM.10083-RA/Caur.EVM.02455-RA/Caur.EVM.09190-RA/Caur.EVM.24155-RA/Caur.EVM.24457-RA/Caur.EVM.29488-RA/Caur.EVM.30810-RA/Caur.EVM.10978-RA/Caur.EVM.05087-RA/Caur.EVM.03622-RA/Caur.EVM.14329-RA/Caur.EVM.05826-RA/Caur.EVM.16047-RA/Caur.EVM.24636-RA/Caur.EVM.03301-RA/Caur.EVM.14703-RA/Caur.EVM.16598-RA/Caur.EVM.18612-RA/Caur.EVM.22399-RA/Cau…	57
ko05203	ko05203	Viral carcinogenesis	58/1717	407/17241	0.00330834	0.0598653	0.0527345	Caur.EVM.00445-RA/Caur.EVM.09190-RA/Caur.EVM.24155-RA/Caur.EVM.26350-RA/Caur.EVM.30810-RA/Caur.EVM.29026-RA/Caur.EVM.16688-RA/Caur.EVM.30395-RA/Caur.EVM.13170-RA/Caur.EVM.13777-RA/Caur.EVM.30987-RA/Caur.EVM.21627-RA/Caur.EVM.06008-RA/Caur.EVM.14703-RA/Caur.EVM.09104-RA/Caur.EVM.31805-RA/Caur.EVM.30977-RA/Caur.EVM.32254-RA/Caur.EVM.39151-RA/Caur.EVM.25032-RA/Caur.EVM.30988-RA/Caur.EVM.23491-RA/Cau…	58
ko04515	ko04515	Cell adhesion molecules [BR:ko04515]	37/1717	238/17241	0.00420454	0.0701271	0.061774	Caur.EVM.29488-RA/Caur.EVM.20379-RA/Caur.EVM.16361-RA/Caur.EVM.03622-RA/Caur.EVM.29437-RA/Caur.EVM.01809-RA/Caur.EVM.35912-RA/Caur.EVM.27246-RA/Caur.EVM.22900-RA/Caur.EVM.09581-RA/Caur.EVM.05318-RA/Caur.EVM.02933-RA/Caur.EVM.13138-RA/Caur.EVM.36722-RA/Caur.EVM.18990-RA/Caur.EVM.35473-RA/Caur.EVM.18807-RA/Caur.EVM.17583-RA/Caur.EVM.01773-RA/Caur.EVM.18118-RA/Caur.EVM.36948-RA/Caur.EVM.29705-RA/Cau…	37
ko05162	ko05162	Measles	35/1717	223/17241	0.00451734	0.0701271	0.061774	Caur.EVM.35728-RA/Caur.EVM.07989-RA/Caur.EVM.11851-RA/Caur.EVM.10083-RA/Caur.EVM.30002-RA/Caur.EVM.29574-RA/Caur.EVM.09190-RA/Caur.EVM.24155-RA/Caur.EVM.03944-RA/Caur.EVM.30810-RA/Caur.EVM.30395-RA/Caur.EVM.15226-RA/Caur.EVM.17245-RA/Caur.EVM.17244-RA/Caur.EVM.14703-RA/Caur.EVM.01250-RA/Caur.EVM.22692-RA/Caur.EVM.12831-RA/Caur.EVM.34661-RA/Caur.EVM.29103-RA/Caur.EVM.27684-RA/Caur.EVM.30948-RA/Cau…	35
ko04050	ko04050	Cytokine receptors [BR:ko04050]	25/1717	145/17241	0.00452078	0.0701271	0.061774	Caur.EVM.02095-RA/Caur.EVM.02598-RA/Caur.EVM.07997-RA/Caur.EVM.16485-RA/Caur.EVM.11842-RA/Caur.EVM.10031-RA/Caur.EVM.12009-RA/Caur.EVM.05026-RA/Caur.EVM.05166-RA/Caur.EVM.29103-RA/Caur.EVM.37203-RA/Caur.EVM.16036-RA/Caur.EVM.37807-RA/Caur.EVM.19056-RA/Caur.EVM.13508-RA/Caur.EVM.31003-RA/Caur.EVM.03819-RA/Caur.EVM.28214-RA/Caur.EVM.24431-RA/Caur.EVM.29388-RA/Caur.EVM.31001-RA/Caur.EVM.11600-RA/Cau…	25
ko05332	ko05332	Graft-versus-host disease	11/1717	46/17241	0.00463665	0.0701271	0.061774	Caur.EVM.00445-RA/Caur.EVM.16688-RA/Caur.EVM.24801-RA/Caur.EVM.13777-RA/Caur.EVM.24200-RA/Caur.EVM.28687-RA/Caur.EVM.20074-RA/Caur.EVM.20316-RA/Caur.EVM.01936-RA/Caur.EVM.06694-RA/Caur.EVM.08767-RA	11
ko04024	ko04024	cAMP signaling pathway	60/1717	431/17241	0.00479817	0.0701271	0.061774	Caur.EVM.11851-RA/Caur.EVM.10083-RA/Caur.EVM.04625-RA/Caur.EVM.18611-RA/Caur.EVM.12254-RA/Caur.EVM.14330-RA/Caur.EVM.13955-RA/Caur.EVM.09190-RA/Caur.EVM.24155-RA/Caur.EVM.31681-RA/Caur.EVM.03944-RA/Caur.EVM.26350-RA/Caur.EVM.15913-RA/Caur.EVM.30810-RA/Caur.EVM.26954-RA/Caur.EVM.34162-RA/Caur.EVM.06590-RA/Caur.EVM.01058-RA/Caur.EVM.13170-RA/Caur.EVM.38172-RA/Caur.EVM.21627-RA/Caur.EVM.12185-RA/Cau…	60
ko04940	ko04940	Type I diabetes mellitus	15/1717	74/17241	0.0056671	0.0797592	0.0702588	Caur.EVM.00445-RA/Caur.EVM.16688-RA/Caur.EVM.24801-RA/Caur.EVM.13777-RA/Caur.EVM.24200-RA/Caur.EVM.28687-RA/Caur.EVM.24274-RA/Caur.EVM.30704-RA/Caur.EVM.20074-RA/Caur.EVM.08011-RA/Caur.EVM.20316-RA/Caur.EVM.01936-RA/Caur.EVM.35047-RA/Caur.EVM.06694-RA/Caur.EVM.08767-RA	15
ko04923	ko04923	Regulation of lipolysis in adipocytes	20/1717	111/17241	0.00635795	0.08347	0.0735276	Caur.EVM.10083-RA/Caur.EVM.09190-RA/Caur.EVM.24155-RA/Caur.EVM.26350-RA/Caur.EVM.30810-RA/Caur.EVM.07468-RA/Caur.EVM.38172-RA/Caur.EVM.12185-RA/Caur.EVM.05328-RA/Caur.EVM.21623-RA/Caur.EVM.09024-RA/Caur.EVM.04641-RA/Caur.EVM.22692-RA/Caur.EVM.34342-RA/Caur.EVM.26263-RA/Caur.EVM.04738-RA/Caur.EVM.08786-RA/Caur.EVM.18970-RA/Caur.EVM.16231-RA/Caur.EVM.07698-RA	20
ko04540	ko04540	Gap junction	29/1717	180/17241	0.00637008	0.08347	0.0735276	Caur.EVM.12028-RA/Caur.EVM.05054-RA/Caur.EVM.26350-RA/Caur.EVM.10093-RA/Caur.EVM.14329-RA/Caur.EVM.18599-RA/Caur.EVM.38172-RA/Caur.EVM.30702-RA/Caur.EVM.08651-RA/Caur.EVM.21623-RA/Caur.EVM.18612-RA/Caur.EVM.38148-RA/Caur.EVM.03296-RA/Caur.EVM.34342-RA/Caur.EVM.01076-RA/Caur.EVM.30094-RA/Caur.EVM.23384-RA/Caur.EVM.16540-RA/Caur.EVM.26263-RA/Caur.EVM.06644-RA/Caur.EVM.08879-RA/Caur.EVM.14669-RA/Cau…	29
ko04921	ko04921	Oxytocin signaling pathway	42/1717	288/17241	0.0075994	0.0946198	0.0833493	Caur.EVM.12254-RA/Caur.EVM.03944-RA/Caur.EVM.26350-RA/Caur.EVM.15913-RA/Caur.EVM.05087-RA/Caur.EVM.10093-RA/Caur.EVM.38172-RA/Caur.EVM.21623-RA/Caur.EVM.07372-RA/Caur.EVM.14703-RA/Caur.EVM.19080-RA/Caur.EVM.16598-RA/Caur.EVM.34735-RA/Caur.EVM.22399-RA/Caur.EVM.30094-RA/Caur.EVM.27470-RA/Caur.EVM.24160-RA/Caur.EVM.23384-RA/Caur.EVM.38991-RA/Caur.EVM.26263-RA/Caur.EVM.24145-RA/Caur.EVM.04152-RA/Cau…	42
ko00537	ko00537	Glycosylphosphatidylinositol (GPI)-anchored proteins [BR:ko00537]	20/1717	113/17241	0.00776909	0.0946198	0.0833493	Caur.EVM.00445-RA/Caur.EVM.16688-RA/Caur.EVM.15130-RA/Caur.EVM.06470-RA/Caur.EVM.02043-RA/Caur.EVM.13777-RA/Caur.EVM.22946-RA/Caur.EVM.13234-RA/Caur.EVM.30995-RA/Caur.EVM.18118-RA/Caur.EVM.21610-RA/Caur.EVM.08345-RA/Caur.EVM.20316-RA/Caur.EVM.01936-RA/Caur.EVM.11600-RA/Caur.EVM.20621-RA/Caur.EVM.00812-RA/Caur.EVM.03030-RA/Caur.EVM.36104-RA/Caur.EVM.20886-RA	20
ko05218	ko05218	Melanoma	28/1717	175/17241	0.00796798	0.0946198	0.0833493	Caur.EVM.10083-RA/Caur.EVM.09190-RA/Caur.EVM.24155-RA/Caur.EVM.38395-RA/Caur.EVM.30810-RA/Caur.EVM.14329-RA/Caur.EVM.18612-RA/Caur.EVM.22692-RA/Caur.EVM.26936-RA/Caur.EVM.12831-RA/Caur.EVM.34166-RA/Caur.EVM.34661-RA/Caur.EVM.30094-RA/Caur.EVM.34157-RA/Caur.EVM.34039-RA/Caur.EVM.06644-RA/Caur.EVM.22429-RA/Caur.EVM.34339-RA/Caur.EVM.33718-RA/Caur.EVM.03760-RA/Caur.EVM.12829-RA/Caur.EVM.12828-RA/Cau…	28
ko04052	ko04052	Cytokines and growth factors [BR:ko04052]	40/1717	273/17241	0.00835137	0.0957196	0.0843181	Caur.EVM.02411-RA/Caur.EVM.13404-RA/Caur.EVM.03229-RA/Caur.EVM.14329-RA/Caur.EVM.28745-RA/Caur.EVM.18612-RA/Caur.EVM.04830-RA/Caur.EVM.29357-RA/Caur.EVM.36257-RA/Caur.EVM.13679-RA/Caur.EVM.06858-RA/Caur.EVM.06414-RA/Caur.EVM.26936-RA/Caur.EVM.27586-RA/Caur.EVM.33732-RA/Caur.EVM.20235-RA/Caur.EVM.02950-RA/Caur.EVM.29746-RA/Caur.EVM.34039-RA/Caur.EVM.19308-RA/Caur.EVM.06644-RA/Caur.EVM.16164-RA/Cau…	40
ko04640	ko04640	Hematopoietic cell lineage	20/1717	114/17241	0.00856439	0.0957196	0.0843181	Caur.EVM.01813-RA/Caur.EVM.05442-RA/Caur.EVM.24801-RA/Caur.EVM.13404-RA/Caur.EVM.27348-RA/Caur.EVM.24200-RA/Caur.EVM.09581-RA/Caur.EVM.08945-RA/Caur.EVM.38045-RA/Caur.EVM.34009-RA/Caur.EVM.31832-RA/Caur.EVM.30083-RA/Caur.EVM.24431-RA/Caur.EVM.31831-RA/Caur.EVM.29388-RA/Caur.EVM.00401-RA/Caur.EVM.27991-RA/Caur.EVM.36570-RA/Caur.EVM.08767-RA/Caur.EVM.23279-RA	20
ko00140	ko00140	Steroid hormone biosynthesis	12/1717	57/17241	0.00933015	0.0999623	0.0880555	Caur.EVM.14456-RA/Caur.EVM.13390-RA/Caur.EVM.05992-RA/Caur.EVM.13391-RA/Caur.EVM.34214-RA/Caur.EVM.02361-RA/Caur.EVM.01550-RA/Caur.EVM.24454-RA/Caur.EVM.13661-RA/Caur.EVM.37822-RA/Caur.EVM.19553-RA/Caur.EVM.22801-RA	12
ko00199	ko00199	Cytochrome P450 [BR:ko00199]	13/1717	64/17241	0.00947012	0.0999623	0.0880555	Caur.EVM.14456-RA/Caur.EVM.33593-RA/Caur.EVM.06435-RA/Caur.EVM.01550-RA/Caur.EVM.20362-RA/Caur.EVM.26173-RA/Caur.EVM.25521-RA/Caur.EVM.10076-RA/Caur.EVM.25569-RA/Caur.EVM.13661-RA/Caur.EVM.37822-RA/Caur.EVM.17860-RA/Caur.EVM.19553-RA	13
ko05340	ko05340	Primary immunodeficiency	10/1717	45/17241	0.0116002	0.119137	0.104946	Caur.EVM.16687-RA/Caur.EVM.07134-RA/Caur.EVM.02550-RA/Caur.EVM.29103-RA/Caur.EVM.08614-RA/Caur.EVM.28214-RA/Caur.EVM.21869-RA/Caur.EVM.06157-RA/Caur.EVM.25903-RA/Caur.EVM.17625-RA	10
ko05031	ko05031	Amphetamine addiction	23/1717	141/17241	0.0121554	0.121554	0.107075	Caur.EVM.18611-RA/Caur.EVM.12254-RA/Caur.EVM.14330-RA/Caur.EVM.31681-RA/Caur.EVM.03944-RA/Caur.EVM.26350-RA/Caur.EVM.18965-RA/Caur.EVM.13170-RA/Caur.EVM.14703-RA/Caur.EVM.08498-RA/Caur.EVM.36613-RA/Caur.EVM.07103-RA/Caur.EVM.34843-RA/Caur.EVM.38991-RA/Caur.EVM.38411-RA/Caur.EVM.24145-RA/Caur.EVM.14685-RA/Caur.EVM.00263-RA/Caur.EVM.32104-RA/Caur.EVM.09914-RA/Caur.EVM.15202-RA/Caur.EVM.16948-RA/Cau…	23
ko04020	ko04020	Calcium signaling pathway	53/1717	391/17241	0.0127059	0.123801	0.109055	Caur.EVM.12254-RA/Caur.EVM.09522-RA/Caur.EVM.26350-RA/Caur.EVM.15913-RA/Caur.EVM.29608-RA/Caur.EVM.05087-RA/Caur.EVM.10093-RA/Caur.EVM.09926-RA/Caur.EVM.18599-RA/Caur.EVM.38172-RA/Caur.EVM.16485-RA/Caur.EVM.17558-RA/Caur.EVM.21623-RA/Caur.EVM.12009-RA/Caur.EVM.25132-RA/Caur.EVM.18424-RA/Caur.EVM.16014-RA/Caur.EVM.34735-RA/Caur.EVM.36613-RA/Caur.EVM.37982-RA/Caur.EVM.30094-RA/Caur.EVM.14018-RA/Cau…	53
ko00535	ko00535	Proteoglycans [BR:ko00535]	15/1717	81/17241	0.0131141	0.124584	0.109745	Caur.EVM.20604-RA/Caur.EVM.02043-RA/Caur.EVM.04744-RA/Caur.EVM.22946-RA/Caur.EVM.35873-RA/Caur.EVM.04654-RA/Caur.EVM.16399-RA/Caur.EVM.22087-RA/Caur.EVM.13234-RA/Caur.EVM.19446-RA/Caur.EVM.19493-RA/Caur.EVM.02234-RA/Caur.EVM.05320-RA/Caur.EVM.04745-RA/Caur.EVM.18979-RA	15
ko05150	ko05150	Staphylococcus aureus infection	17/1717	97/17241	0.0147381	0.135547	0.119402	Caur.EVM.22351-RA/Caur.EVM.03180-RA/Caur.EVM.32865-RA/Caur.EVM.18431-RA/Caur.EVM.24801-RA/Caur.EVM.24200-RA/Caur.EVM.18668-RA/Caur.EVM.05259-RA/Caur.EVM.32867-RA/Caur.EVM.28009-RA/Caur.EVM.01160-RA/Caur.EVM.36948-RA/Caur.EVM.22119-RA/Caur.EVM.38164-RA/Caur.EVM.29424-RA/Caur.EVM.08767-RA/Caur.EVM.32876-RA	17
ko04922	ko04922	Glucagon signaling pathway	30/1717	200/17241	0.0149816	0.135547	0.119402	Caur.EVM.10083-RA/Caur.EVM.12254-RA/Caur.EVM.26350-RA/Caur.EVM.23858-RA/Caur.EVM.13676-RA/Caur.EVM.26021-RA/Caur.EVM.29026-RA/Caur.EVM.10093-RA/Caur.EVM.26159-RA/Caur.EVM.13170-RA/Caur.EVM.21627-RA/Caur.EVM.05328-RA/Caur.EVM.08884-RA/Caur.EVM.12128-RA/Caur.EVM.27677-RA/Caur.EVM.16285-RA/Caur.EVM.23384-RA/Caur.EVM.38991-RA/Caur.EVM.35760-RA/Caur.EVM.25413-RA/Caur.EVM.09505-RA/Caur.EVM.23301-RA/Cau…	30
ko05204	ko05204	Chemical carcinogenesis	11/1717	54/17241	0.0159537	0.137782	0.12137	Caur.EVM.14456-RA/Caur.EVM.13390-RA/Caur.EVM.09522-RA/Caur.EVM.13391-RA/Caur.EVM.08894-RA/Caur.EVM.02361-RA/Caur.EVM.37822-RA/Caur.EVM.19553-RA/Caur.EVM.07698-RA/Caur.EVM.22801-RA/Caur.EVM.03916-RA	11
ko05330	ko05330	Allograft rejection	11/1717	54/17241	0.0159537	0.137782	0.12137	Caur.EVM.00445-RA/Caur.EVM.16688-RA/Caur.EVM.24801-RA/Caur.EVM.13777-RA/Caur.EVM.24200-RA/Caur.EVM.28687-RA/Caur.EVM.20074-RA/Caur.EVM.20316-RA/Caur.EVM.01936-RA/Caur.EVM.06694-RA/Caur.EVM.08767-RA	11
ko04810	ko04810	Regulation of actin cytoskeleton	57/1717	433/17241	0.0175276	0.146957	0.129452	Caur.EVM.07989-RA/Caur.EVM.09190-RA/Caur.EVM.08429-RA/Caur.EVM.24155-RA/Caur.EVM.29488-RA/Caur.EVM.30810-RA/Caur.EVM.05087-RA/Caur.EVM.03901-RA/Caur.EVM.03622-RA/Caur.EVM.15226-RA/Caur.EVM.14329-RA/Caur.EVM.16485-RA/Caur.EVM.03301-RA/Caur.EVM.12009-RA/Caur.EVM.13653-RA/Caur.EVM.33071-RA/Caur.EVM.16598-RA/Caur.EVM.18612-RA/Caur.EVM.22399-RA/Caur.EVM.09581-RA/Caur.EVM.39151-RA/Caur.EVM.26764-RA/Cau…	57
ko00536	ko00536	Glycosaminoglycan binding proteins [BR:ko00536]	51/1717	381/17241	0.0177895	0.146957	0.129452	Caur.EVM.35279-RA/Caur.EVM.30734-RA/Caur.EVM.22242-RA/Caur.EVM.02455-RA/Caur.EVM.08203-RA/Caur.EVM.24457-RA/Caur.EVM.10978-RA/Caur.EVM.03901-RA/Caur.EVM.24912-RA/Caur.EVM.03229-RA/Caur.EVM.06470-RA/Caur.EVM.30130-RA/Caur.EVM.03301-RA/Caur.EVM.05194-RA/Caur.EVM.37814-RA/Caur.EVM.29357-RA/Caur.EVM.13679-RA/Caur.EVM.31307-RA/Caur.EVM.14272-RA/Caur.EVM.26936-RA/Caur.EVM.03862-RA/Caur.EVM.23824-RA/Cau…	51
ko04213	ko04213	Longevity regulating pathway - multiple species	21/1717	132/17241	0.0208221	0.168349	0.148297	Caur.EVM.35728-RA/Caur.EVM.10083-RA/Caur.EVM.30002-RA/Caur.EVM.29574-RA/Caur.EVM.09190-RA/Caur.EVM.24155-RA/Caur.EVM.26350-RA/Caur.EVM.30810-RA/Caur.EVM.17245-RA/Caur.EVM.38172-RA/Caur.EVM.17244-RA/Caur.EVM.21623-RA/Caur.EVM.09024-RA/Caur.EVM.22692-RA/Caur.EVM.07669-RA/Caur.EVM.34166-RA/Caur.EVM.26263-RA/Caur.EVM.35970-RA/Caur.EVM.25413-RA/Caur.EVM.23668-RA/Caur.EVM.16231-RA	21
ko00830	ko00830	Retinol metabolism	12/1717	64/17241	0.0227393	0.180019	0.158577	Caur.EVM.14456-RA/Caur.EVM.13390-RA/Caur.EVM.13391-RA/Caur.EVM.33301-RA/Caur.EVM.02361-RA/Caur.EVM.19772-RA/Caur.EVM.20362-RA/Caur.EVM.25521-RA/Caur.EVM.13760-RA/Caur.EVM.25569-RA/Caur.EVM.19553-RA/Caur.EVM.22801-RA	12
ko04974	ko04974	Protein digestion and absorption	31/1717	219/17241	0.0285609	0.221493	0.19511	Caur.EVM.35279-RA/Caur.EVM.30734-RA/Caur.EVM.38951-RA/Caur.EVM.35475-RA/Caur.EVM.25596-RA/Caur.EVM.02455-RA/Caur.EVM.05893-RA/Caur.EVM.02047-RA/Caur.EVM.31583-RA/Caur.EVM.04744-RA/Caur.EVM.31951-RA/Caur.EVM.14272-RA/Caur.EVM.23824-RA/Caur.EVM.18993-RA/Caur.EVM.26803-RA/Caur.EVM.06119-RA/Caur.EVM.15058-RA/Caur.EVM.36966-RA/Caur.EVM.28344-RA/Caur.EVM.03911-RA/Caur.EVM.26403-RA/Caur.EVM.04745-RA/Cau…	31
ko04913	ko04913	Ovarian steroidogenesis	13/1717	75/17241	0.0330152	0.250915	0.221028	Caur.EVM.14456-RA/Caur.EVM.05992-RA/Caur.EVM.26350-RA/Caur.EVM.15975-RA/Caur.EVM.38172-RA/Caur.EVM.21623-RA/Caur.EVM.34166-RA/Caur.EVM.26263-RA/Caur.EVM.37822-RA/Caur.EVM.16231-RA/Caur.EVM.07698-RA/Caur.EVM.27880-RA/Caur.EVM.15945-RA	13
ko00230	ko00230	Purine metabolism	30/1717	214/17241	0.0345621	0.257522	0.226847	Caur.EVM.22542-RA/Caur.EVM.09807-RA/Caur.EVM.29026-RA/Caur.EVM.33291-RA/Caur.EVM.01058-RA/Caur.EVM.38172-RA/Caur.EVM.37232-RA/Caur.EVM.23398-RA/Caur.EVM.05328-RA/Caur.EVM.21623-RA/Caur.EVM.32758-RA/Caur.EVM.14775-RA/Caur.EVM.24160-RA/Caur.EVM.10566-RA/Caur.EVM.26263-RA/Caur.EVM.14662-RA/Caur.EVM.20997-RA/Caur.EVM.20470-RA/Caur.EVM.34879-RA/Caur.EVM.28460-RA/Caur.EVM.38005-RA/Caur.EVM.37260-RA/Cau…	30
ko04670	ko04670	Leukocyte transendothelial migration	32/1717	232/17241	0.0363637	0.265734	0.234082	Caur.EVM.07989-RA/Caur.EVM.09190-RA/Caur.EVM.36406-RA/Caur.EVM.24155-RA/Caur.EVM.00999-RA/Caur.EVM.30810-RA/Caur.EVM.39161-RA/Caur.EVM.15226-RA/Caur.EVM.36409-RA/Caur.EVM.36407-RA/Caur.EVM.05826-RA/Caur.EVM.16485-RA/Caur.EVM.12009-RA/Caur.EVM.33105-RA/Caur.EVM.16598-RA/Caur.EVM.39151-RA/Caur.EVM.22692-RA/Caur.EVM.11439-RA/Caur.EVM.16183-RA/Caur.EVM.13752-RA/Caur.EVM.24820-RA/Caur.EVM.07829-RA/Cau…	32
ko04650	ko04650	Natural killer cell mediated cytotoxicity	23/1717	157/17241	0.0383525	0.274802	0.242069	Caur.EVM.00445-RA/Caur.EVM.09190-RA/Caur.EVM.24155-RA/Caur.EVM.30810-RA/Caur.EVM.16688-RA/Caur.EVM.07134-RA/Caur.EVM.13777-RA/Caur.EVM.22692-RA/Caur.EVM.30547-RA/Caur.EVM.11577-RA/Caur.EVM.38991-RA/Caur.EVM.29746-RA/Caur.EVM.29510-RA/Caur.EVM.28687-RA/Caur.EVM.08479-RA/Caur.EVM.36948-RA/Caur.EVM.20074-RA/Caur.EVM.20316-RA/Caur.EVM.01936-RA/Caur.EVM.24711-RA/Caur.EVM.06694-RA/Caur.EVM.25903-RA/Cau…	23
ko04711	ko04711	Circadian rhythm - fly	6/1717	26/17241	0.0390507	0.274802	0.242069	Caur.EVM.09413-RA/Caur.EVM.18306-RA/Caur.EVM.27684-RA/Caur.EVM.27556-RA/Caur.EVM.21596-RA/Caur.EVM.01993-RA	6
ko04713	ko04713	Circadian entrainment	28/1717	201/17241	0.0429175	0.296336	0.261038	Caur.EVM.18611-RA/Caur.EVM.12254-RA/Caur.EVM.14330-RA/Caur.EVM.31681-RA/Caur.EVM.03944-RA/Caur.EVM.26350-RA/Caur.EVM.15913-RA/Caur.EVM.29608-RA/Caur.EVM.10093-RA/Caur.EVM.09413-RA/Caur.EVM.38172-RA/Caur.EVM.21623-RA/Caur.EVM.18306-RA/Caur.EVM.34735-RA/Caur.EVM.36613-RA/Caur.EVM.34342-RA/Caur.EVM.34843-RA/Caur.EVM.26263-RA/Caur.EVM.38768-RA/Caur.EVM.04149-RA/Caur.EVM.14685-RA/Caur.EVM.00263-RA/Cau…	28
ko04216	ko04216	Ferroptosis	13/1717	78/17241	0.0436706	0.296336	0.261038	Caur.EVM.05893-RA/Caur.EVM.33514-RA/Caur.EVM.07444-RA/Caur.EVM.02019-RA/Caur.EVM.18589-RA/Caur.EVM.04364-RA/Caur.EVM.34661-RA/Caur.EVM.34555-RA/Caur.EVM.07521-RA/Caur.EVM.05417-RA/Caur.EVM.30083-RA/Caur.EVM.13425-RA/Caur.EVM.13420-RA	13
ko04728	ko04728	Dopaminergic synapse	37/1717	280/17241	0.0456179	0.298949	0.26334	Caur.EVM.11851-RA/Caur.EVM.10083-RA/Caur.EVM.18611-RA/Caur.EVM.12254-RA/Caur.EVM.28090-RA/Caur.EVM.14330-RA/Caur.EVM.31681-RA/Caur.EVM.03944-RA/Caur.EVM.26350-RA/Caur.EVM.18965-RA/Caur.EVM.10093-RA/Caur.EVM.13170-RA/Caur.EVM.33263-RA/Caur.EVM.34214-RA/Caur.EVM.06422-RA/Caur.EVM.07535-RA/Caur.EVM.07103-RA/Caur.EVM.10055-RA/Caur.EVM.27684-RA/Caur.EVM.23384-RA/Caur.EVM.34843-RA/Caur.EVM.38991-RA/Cau…	37
ko05214	ko05214	Glioma	22/1717	152/17241	0.0471475	0.298949	0.26334	Caur.EVM.10083-RA/Caur.EVM.12254-RA/Caur.EVM.09190-RA/Caur.EVM.24155-RA/Caur.EVM.38395-RA/Caur.EVM.30810-RA/Caur.EVM.22692-RA/Caur.EVM.12831-RA/Caur.EVM.34166-RA/Caur.EVM.34661-RA/Caur.EVM.30094-RA/Caur.EVM.34157-RA/Caur.EVM.24145-RA/Caur.EVM.06644-RA/Caur.EVM.06559-RA/Caur.EVM.03760-RA/Caur.EVM.12828-RA/Caur.EVM.27448-RA/Caur.EVM.14685-RA/Caur.EVM.09914-RA/Caur.EVM.16948-RA/Caur.EVM.15101-RA	22
ko04971	ko04971	Gastric acid secretion	21/1717	144/17241	0.048152	0.298949	0.26334	Caur.EVM.04625-RA/Caur.EVM.12254-RA/Caur.EVM.13955-RA/Caur.EVM.26350-RA/Caur.EVM.05087-RA/Caur.EVM.10093-RA/Caur.EVM.34162-RA/Caur.EVM.02323-RA/Caur.EVM.06590-RA/Caur.EVM.36659-RA/Caur.EVM.38172-RA/Caur.EVM.21623-RA/Caur.EVM.31583-RA/Caur.EVM.23384-RA/Caur.EVM.26263-RA/Caur.EVM.10100-RA/Caur.EVM.14685-RA/Caur.EVM.09914-RA/Caur.EVM.16231-RA/Caur.EVM.16948-RA/Caur.EVM.16244-RA	21
ko04054	ko04054	Pattern recognition receptors [BR:ko04054]	14/1717	87/17241	0.0481891	0.298949	0.26334	Caur.EVM.35947-RA/Caur.EVM.09543-RA/Caur.EVM.32721-RA/Caur.EVM.30598-RA/Caur.EVM.22561-RA/Caur.EVM.01523-RA/Caur.EVM.37962-RA/Caur.EVM.38308-RA/Caur.EVM.04137-RA/Caur.EVM.32116-RA/Caur.EVM.15426-RA/Caur.EVM.36804-RA/Caur.EVM.26479-RA/Caur.EVM.28001-RA	14
ko04072	ko04072	Phospholipase D signaling pathway	39/1717	299/17241	0.0485901	0.298949	0.26334	Caur.EVM.10083-RA/Caur.EVM.09190-RA/Caur.EVM.29299-RA/Caur.EVM.24155-RA/Caur.EVM.30810-RA/Caur.EVM.10093-RA/Caur.EVM.03901-RA/Caur.EVM.09833-RA/Caur.EVM.10502-RA/Caur.EVM.14329-RA/Caur.EVM.18599-RA/Caur.EVM.38172-RA/Caur.EVM.21623-RA/Caur.EVM.13653-RA/Caur.EVM.36005-RA/Caur.EVM.09689-RA/Caur.EVM.18612-RA/Caur.EVM.22692-RA/Caur.EVM.30547-RA/Caur.EVM.28042-RA/Caur.EVM.37982-RA/Caur.EVM.30094-RA/Cau…	39
ko04270	ko04270	Vascular smooth muscle contraction	29/1717	212/17241	0.0487759	0.298949	0.26334	Caur.EVM.26350-RA/Caur.EVM.33218-RA/Caur.EVM.05087-RA/Caur.EVM.10093-RA/Caur.EVM.32343-RA/Caur.EVM.38172-RA/Caur.EVM.34118-RA/Caur.EVM.21623-RA/Caur.EVM.19080-RA/Caur.EVM.16598-RA/Caur.EVM.14218-RA/Caur.EVM.22399-RA/Caur.EVM.05330-RA/Caur.EVM.34342-RA/Caur.EVM.37982-RA/Caur.EVM.24160-RA/Caur.EVM.23384-RA/Caur.EVM.26263-RA/Caur.EVM.32534-RA/Caur.EVM.05662-RA/Caur.EVM.03473-RA/Caur.EVM.01107-RA/Cau…	29
