# Supplementary material for: Formation of autotriploid Carassius auratus and its fertility-related genes analysis
Source: Research Square preprint supplement (doi:10.21203/rs.3.rs-397574/v1), 2021-04-13
Supplement: Supplementary file 12 [file f5bb58ccc6dc11ccb85a7381.xlsx]

## Sheet: Sheet1
Additional file 4: Table S4. Gene classification based on Kyoto Encyclopedia of Genes and Genomes (KEGG) for DEGs in F3nRR vs FRCC
	ID	Description	GeneRatio	BgRatio	pvalue	p.adjust	qvalue	geneID	Count
ko04040	ko04040	Ion channels [BR:ko04040]	315/9278	487/17241	5.36838e-07	0.000219567	0.000206259	Caur.EVM.35230-RA/Caur.EVM.01710-RA/Caur.EVM.33970-RA/Caur.EVM.03982-RA/Caur.EVM.23010-RA/Caur.EVM.34322-RA/Caur.EVM.32753-RA/Caur.EVM.07937-RA/Caur.EVM.37446-RA/Caur.EVM.04187-RA/Caur.EVM.02303-RA/Caur.EVM.06037-RA/Caur.EVM.16645-RA/Caur.EVM.16907-RA/Caur.EVM.30071-RA/Caur.EVM.35478-RA/Caur.EVM.07957-RA/Caur.EVM.05686-RA/Caur.EVM.22847-RA/Caur.EVM.39134-RA/Caur.EVM.26055-RA/Caur.EVM.02066-RA/Cau…	315
ko04974	ko04974	Protein digestion and absorption	146/9278	219/17241	6.83549e-05	0.00970465	0.00911645	Caur.EVM.05893-RA/Caur.EVM.31360-RA/Caur.EVM.27238-RA/Caur.EVM.00018-RA/Caur.EVM.24916-RA/Caur.EVM.08611-RA/Caur.EVM.17604-RA/Caur.EVM.37261-RA/Caur.EVM.15614-RA/Caur.EVM.06884-RA/Caur.EVM.21453-RA/Caur.EVM.30734-RA/Caur.EVM.38659-RA/Caur.EVM.13941-RA/Caur.EVM.33878-RA/Caur.EVM.33761-RA/Caur.EVM.18310-RA/Caur.EVM.14597-RA/Caur.EVM.13245-RA/Caur.EVM.26190-RA/Caur.EVM.15950-RA/Caur.EVM.13785-RA/Cau…	146
ko04512	ko04512	ECM-receptor interaction	100/9278	144/17241	8.82872e-05	0.00970465	0.00911645	Caur.EVM.02697-RA/Caur.EVM.17604-RA/Caur.EVM.06884-RA/Caur.EVM.33454-RA/Caur.EVM.30734-RA/Caur.EVM.13056-RA/Caur.EVM.13941-RA/Caur.EVM.01531-RA/Caur.EVM.37315-RA/Caur.EVM.28811-RA/Caur.EVM.28050-RA/Caur.EVM.33761-RA/Caur.EVM.18310-RA/Caur.EVM.00179-RA/Caur.EVM.11437-RA/Caur.EVM.05268-RA/Caur.EVM.18502-RA/Caur.EVM.21509-RA/Caur.EVM.25932-RA/Caur.EVM.30699-RA/Caur.EVM.02374-RA/Caur.EVM.15668-RA/Cau…	100
ko05322	ko05322	Systemic lupus erythematosus	137/9278	205/17241	9.4911e-05	0.00970465	0.00911645	Caur.EVM.25691-RA/Caur.EVM.36709-RA/Caur.EVM.04879-RA/Caur.EVM.10944-RA/Caur.EVM.37407-RA/Caur.EVM.08691-RA/Caur.EVM.09294-RA/Caur.EVM.06007-RA/Caur.EVM.21759-RA/Caur.EVM.30983-RA/Caur.EVM.04872-RA/Caur.EVM.10595-RA/Caur.EVM.18013-RA/Caur.EVM.01115-RA/Caur.EVM.13536-RA/Caur.EVM.09776-RA/Caur.EVM.07821-RA/Caur.EVM.30961-RA/Caur.EVM.06008-RA/Caur.EVM.12627-RA/Caur.EVM.20287-RA/Caur.EVM.32271-RA/Cau…	137
ko04515	ko04515	Cell adhesion molecules [BR:ko04515]	155/9278	238/17241	0.000240393	0.0196641	0.0184723	Caur.EVM.01709-RA/Caur.EVM.02042-RA/Caur.EVM.39171-RA/Caur.EVM.33929-RA/Caur.EVM.34855-RA/Caur.EVM.30548-RA/Caur.EVM.01531-RA/Caur.EVM.14747-RA/Caur.EVM.00308-RA/Caur.EVM.17922-RA/Caur.EVM.23038-RA/Caur.EVM.05952-RA/Caur.EVM.37512-RA/Caur.EVM.28050-RA/Caur.EVM.11437-RA/Caur.EVM.05268-RA/Caur.EVM.18502-RA/Caur.EVM.32965-RA/Caur.EVM.12405-RA/Caur.EVM.01755-RA/Caur.EVM.01389-RA/Caur.EVM.37413-RA/Cau…	155
ko05034	ko05034	Alcoholism	196/9278	309/17241	0.000351675	0.0239725	0.0225196	Caur.EVM.25691-RA/Caur.EVM.36709-RA/Caur.EVM.20518-RA/Caur.EVM.04879-RA/Caur.EVM.10944-RA/Caur.EVM.37407-RA/Caur.EVM.06479-RA/Caur.EVM.08691-RA/Caur.EVM.06007-RA/Caur.EVM.21759-RA/Caur.EVM.30983-RA/Caur.EVM.04872-RA/Caur.EVM.37064-RA/Caur.EVM.18013-RA/Caur.EVM.01273-RA/Caur.EVM.19767-RA/Caur.EVM.01115-RA/Caur.EVM.13536-RA/Caur.EVM.24408-RA/Caur.EVM.09199-RA/Caur.EVM.09776-RA/Caur.EVM.07821-RA/Cau…	196
ko04054	ko04054	Pattern recognition receptors [BR:ko04054]	62/9278	87/17241	0.000640048	0.0367293	0.0345031	Caur.EVM.30598-RA/Caur.EVM.06257-RA/Caur.EVM.37113-RA/Caur.EVM.25235-RA/Caur.EVM.37131-RA/Caur.EVM.31051-RA/Caur.EVM.01522-RA/Caur.EVM.35947-RA/Caur.EVM.32859-RA/Caur.EVM.05267-RA/Caur.EVM.16815-RA/Caur.EVM.24213-RA/Caur.EVM.09543-RA/Caur.EVM.09642-RA/Caur.EVM.15949-RA/Caur.EVM.16814-RA/Caur.EVM.17356-RA/Caur.EVM.19456-RA/Caur.EVM.10823-RA/Caur.EVM.31212-RA/Caur.EVM.19794-RA/Caur.EVM.04080-RA/Cau…	62
ko05340	ko05340	Primary immunodeficiency	35/9278	45/17241	0.000765123	0.0367293	0.0345031	Caur.EVM.34322-RA/Caur.EVM.27601-RA/Caur.EVM.37113-RA/Caur.EVM.19323-RA/Caur.EVM.16687-RA/Caur.EVM.19456-RA/Caur.EVM.04851-RA/Caur.EVM.02856-RA/Caur.EVM.35062-RA/Caur.EVM.18064-RA/Caur.EVM.21869-RA/Caur.EVM.29103-RA/Caur.EVM.34827-RA/Caur.EVM.35626-RA/Caur.EVM.11870-RA/Caur.EVM.13109-RA/Caur.EVM.25903-RA/Caur.EVM.04799-RA/Caur.EVM.00400-RA/Caur.EVM.07289-RA/Caur.EVM.17625-RA/Caur.EVM.17209-RA/Cau…	35
ko04724	ko04724	Glutamatergic synapse	156/9278	244/17241	0.000808223	0.0367293	0.0345031	Caur.EVM.27026-RA/Caur.EVM.34541-RA/Caur.EVM.31397-RA/Caur.EVM.10154-RA/Caur.EVM.06093-RA/Caur.EVM.11519-RA/Caur.EVM.06479-RA/Caur.EVM.09197-RA/Caur.EVM.24536-RA/Caur.EVM.19608-RA/Caur.EVM.24916-RA/Caur.EVM.01273-RA/Caur.EVM.19767-RA/Caur.EVM.14732-RA/Caur.EVM.21453-RA/Caur.EVM.34366-RA/Caur.EVM.32358-RA/Caur.EVM.07812-RA/Caur.EVM.14936-RA/Caur.EVM.33657-RA/Caur.EVM.07957-RA/Caur.EVM.26263-RA/Cau…	156
ko04016	ko04016	MAPK signaling pathway - plant	48/9278	66/17241	0.00125702	0.0514122	0.0482961	Caur.EVM.12611-RA/Caur.EVM.22849-RA/Caur.EVM.16405-RA/Caur.EVM.33451-RA/Caur.EVM.14193-RA/Caur.EVM.17192-RA/Caur.EVM.29282-RA/Caur.EVM.21632-RA/Caur.EVM.10642-RA/Caur.EVM.29664-RA/Caur.EVM.06048-RA/Caur.EVM.13589-RA/Caur.EVM.06243-RA/Caur.EVM.31147-RA/Caur.EVM.08680-RA/Caur.EVM.14502-RA/Caur.EVM.12381-RA/Caur.EVM.02447-RA/Caur.EVM.14301-RA/Caur.EVM.03259-RA/Caur.EVM.02446-RA/Caur.EVM.02445-RA/Cau…	48
ko00199	ko00199	Cytochrome P450 [BR:ko00199]	46/9278	64/17241	0.0023517	0.0874406	0.0821409	Caur.EVM.23333-RA/Caur.EVM.20362-RA/Caur.EVM.14456-RA/Caur.EVM.12070-RA/Caur.EVM.37010-RA/Caur.EVM.01550-RA/Caur.EVM.02014-RA/Caur.EVM.11025-RA/Caur.EVM.34057-RA/Caur.EVM.16219-RA/Caur.EVM.26172-RA/Caur.EVM.05329-RA/Caur.EVM.38749-RA/Caur.EVM.38132-RA/Caur.EVM.32363-RA/Caur.EVM.34476-RA/Caur.EVM.10349-RA/Caur.EVM.13661-RA/Caur.EVM.34510-RA/Caur.EVM.26554-RA/Caur.EVM.05022-RA/Caur.EVM.23916-RA/Cau…	46
ko00536	ko00536	Glycosaminoglycan binding proteins [BR:ko00536]	232/9278	381/17241	0.00286384	0.0976092	0.0916931	Caur.EVM.08203-RA/Caur.EVM.00956-RA/Caur.EVM.10111-RA/Caur.EVM.22097-RA/Caur.EVM.13327-RA/Caur.EVM.31360-RA/Caur.EVM.02697-RA/Caur.EVM.27238-RA/Caur.EVM.08807-RA/Caur.EVM.17604-RA/Caur.EVM.06884-RA/Caur.EVM.30734-RA/Caur.EVM.13941-RA/Caur.EVM.28811-RA/Caur.EVM.05952-RA/Caur.EVM.00495-RA/Caur.EVM.37724-RA/Caur.EVM.03229-RA/Caur.EVM.22174-RA/Caur.EVM.33761-RA/Caur.EVM.18310-RA/Caur.EVM.14597-RA/Cau…	232
ko04075	ko04075	Plant hormone signal transduction	33/9278	44/17241	0.00316171	0.0994723	0.0934433	Caur.EVM.12611-RA/Caur.EVM.33451-RA/Caur.EVM.29282-RA/Caur.EVM.10642-RA/Caur.EVM.29664-RA/Caur.EVM.06048-RA/Caur.EVM.06243-RA/Caur.EVM.02447-RA/Caur.EVM.14301-RA/Caur.EVM.03259-RA/Caur.EVM.02446-RA/Caur.EVM.02445-RA/Caur.EVM.02457-RA/Caur.EVM.23087-RA/Caur.EVM.04727-RA/Caur.EVM.07379-RA/Caur.EVM.23873-RA/Caur.EVM.25074-RA/Caur.EVM.14857-RA/Caur.EVM.05317-RA/Caur.EVM.14858-RA/Caur.EVM.38100-RA/Cau…	33
ko01003	ko01003	Glycosyltransferases [BR:ko01003]	226/9278	372/17241	0.00376046	0.106865	0.100388	Caur.EVM.33946-RA/Caur.EVM.35928-RA/Caur.EVM.35640-RA/Caur.EVM.34143-RA/Caur.EVM.18992-RA/Caur.EVM.03253-RA/Caur.EVM.16737-RA/Caur.EVM.35265-RA/Caur.EVM.11063-RA/Caur.EVM.28971-RA/Caur.EVM.20855-RA/Caur.EVM.13658-RA/Caur.EVM.26600-RA/Caur.EVM.29606-RA/Caur.EVM.16414-RA/Caur.EVM.01014-RA/Caur.EVM.13369-RA/Caur.EVM.36164-RA/Caur.EVM.23460-RA/Caur.EVM.20127-RA/Caur.EVM.01361-RA/Caur.EVM.08800-RA/Cau…	226
ko04510	ko04510	Focal adhesion	239/9278	395/17241	0.00391924	0.106865	0.100388	Caur.EVM.33870-RA/Caur.EVM.26232-RA/Caur.EVM.20518-RA/Caur.EVM.24242-RA/Caur.EVM.14703-RA/Caur.EVM.22754-RA/Caur.EVM.19747-RA/Caur.EVM.02697-RA/Caur.EVM.38066-RA/Caur.EVM.32829-RA/Caur.EVM.11833-RA/Caur.EVM.37064-RA/Caur.EVM.31388-RA/Caur.EVM.17604-RA/Caur.EVM.24408-RA/Caur.EVM.11516-RA/Caur.EVM.06884-RA/Caur.EVM.30734-RA/Caur.EVM.13056-RA/Caur.EVM.13941-RA/Caur.EVM.07142-RA/Caur.EVM.01531-RA/Cau…	239
ko04514	ko04514	Cell adhesion molecules (CAMs)	149/9278	239/17241	0.00448989	0.10931	0.102685	Caur.EVM.36409-RA/Caur.EVM.05916-RA/Caur.EVM.05917-RA/Caur.EVM.23602-RA/Caur.EVM.10958-RA/Caur.EVM.01729-RA/Caur.EVM.00999-RA/Caur.EVM.23860-RA/Caur.EVM.34855-RA/Caur.EVM.05139-RA/Caur.EVM.29852-RA/Caur.EVM.01531-RA/Caur.EVM.05952-RA/Caur.EVM.33804-RA/Caur.EVM.18515-RA/Caur.EVM.32965-RA/Caur.EVM.12405-RA/Caur.EVM.34424-RA/Caur.EVM.01389-RA/Caur.EVM.28502-RA/Caur.EVM.06484-RA/Caur.EVM.27437-RA/Cau…	149
ko04050	ko04050	Cytokine receptors [BR:ko04050]	94/9278	145/17241	0.00454346	0.10931	0.102685	Caur.EVM.10322-RA/Caur.EVM.19377-RA/Caur.EVM.10995-RA/Caur.EVM.14627-RA/Caur.EVM.27976-RA/Caur.EVM.15656-RA/Caur.EVM.02598-RA/Caur.EVM.24018-RA/Caur.EVM.10003-RA/Caur.EVM.10031-RA/Caur.EVM.18099-RA/Caur.EVM.05069-RA/Caur.EVM.16485-RA/Caur.EVM.08081-RA/Caur.EVM.07734-RA/Caur.EVM.13150-RA/Caur.EVM.21764-RA/Caur.EVM.24458-RA/Caur.EVM.19920-RA/Caur.EVM.25872-RA/Caur.EVM.05026-RA/Caur.EVM.37235-RA/Cau…	94
ko04024	ko04024	cAMP signaling pathway	258/9278	431/17241	0.0060349	0.137126	0.128815	Caur.EVM.27026-RA/Caur.EVM.31022-RA/Caur.EVM.26232-RA/Caur.EVM.20518-RA/Caur.EVM.06479-RA/Caur.EVM.14703-RA/Caur.EVM.05622-RA/Caur.EVM.19165-RA/Caur.EVM.19747-RA/Caur.EVM.34322-RA/Caur.EVM.38066-RA/Caur.EVM.37064-RA/Caur.EVM.32164-RA/Caur.EVM.31388-RA/Caur.EVM.09715-RA/Caur.EVM.01273-RA/Caur.EVM.19767-RA/Caur.EVM.37261-RA/Caur.EVM.24408-RA/Caur.EVM.11516-RA/Caur.EVM.14732-RA/Caur.EVM.12143-RA/Cau…	258
ko04115	ko04115	p53 signaling pathway	84/9278	130/17241	0.00798616	0.171913	0.161493	Caur.EVM.24156-RA/Caur.EVM.02145-RA/Caur.EVM.09188-RA/Caur.EVM.00879-RA/Caur.EVM.07022-RA/Caur.EVM.11520-RA/Caur.EVM.02955-RA/Caur.EVM.33246-RA/Caur.EVM.31395-RA/Caur.EVM.38799-RA/Caur.EVM.02697-RA/Caur.EVM.29117-RA/Caur.EVM.24881-RA/Caur.EVM.11833-RA/Caur.EVM.08807-RA/Caur.EVM.07638-RA/Caur.EVM.14239-RA/Caur.EVM.36661-RA/Caur.EVM.02689-RA/Caur.EVM.33242-RA/Caur.EVM.12828-RA/Caur.EVM.09214-RA/Cau…	84
ko00830	ko00830	Retinol metabolism	44/9278	64/17241	0.0106544	0.217883	0.204677	Caur.EVM.26540-RA/Caur.EVM.33233-RA/Caur.EVM.20362-RA/Caur.EVM.14456-RA/Caur.EVM.00886-RA/Caur.EVM.07057-RA/Caur.EVM.02072-RA/Caur.EVM.07450-RA/Caur.EVM.35353-RA/Caur.EVM.33301-RA/Caur.EVM.07056-RA/Caur.EVM.37613-RA/Caur.EVM.05496-RA/Caur.EVM.34527-RA/Caur.EVM.02361-RA/Caur.EVM.27265-RA/Caur.EVM.19772-RA/Caur.EVM.12565-RA/Caur.EVM.21721-RA/Caur.EVM.38793-RA/Caur.EVM.15111-RA/Caur.EVM.23027-RA/Cau…	44
ko04976	ko04976	Bile secretion	82/9278	128/17241	0.0118862	0.231497	0.217466	Caur.EVM.27026-RA/Caur.EVM.19165-RA/Caur.EVM.15528-RA/Caur.EVM.34376-RA/Caur.EVM.19767-RA/Caur.EVM.37261-RA/Caur.EVM.27669-RA/Caur.EVM.14732-RA/Caur.EVM.38659-RA/Caur.EVM.07812-RA/Caur.EVM.26263-RA/Caur.EVM.06513-RA/Caur.EVM.13245-RA/Caur.EVM.13785-RA/Caur.EVM.23438-RA/Caur.EVM.10488-RA/Caur.EVM.18043-RA/Caur.EVM.13974-RA/Caur.EVM.34162-RA/Caur.EVM.15104-RA/Caur.EVM.14911-RA/Caur.EVM.09363-RA/Cau…	82
ko00140	ko00140	Steroid hormone biosynthesis	39/9278	57/17241	0.0176443	0.305958	0.287414	Caur.EVM.00814-RA/Caur.EVM.01290-RA/Caur.EVM.12351-RA/Caur.EVM.33676-RA/Caur.EVM.14456-RA/Caur.EVM.20134-RA/Caur.EVM.07057-RA/Caur.EVM.01550-RA/Caur.EVM.17246-RA/Caur.EVM.07056-RA/Caur.EVM.16219-RA/Caur.EVM.02361-RA/Caur.EVM.27265-RA/Caur.EVM.17639-RA/Caur.EVM.32363-RA/Caur.EVM.18950-RA/Caur.EVM.13661-RA/Caur.EVM.05022-RA/Caur.EVM.29448-RA/Caur.EVM.11386-RA/Caur.EVM.36853-RA/Caur.EVM.14803-RA/Cau…	39
ko00510	ko00510	N-Glycan biosynthesis	57/9278	87/17241	0.0177025	0.305958	0.287414	Caur.EVM.35928-RA/Caur.EVM.03253-RA/Caur.EVM.35265-RA/Caur.EVM.12351-RA/Caur.EVM.29606-RA/Caur.EVM.16414-RA/Caur.EVM.23460-RA/Caur.EVM.20127-RA/Caur.EVM.19305-RA/Caur.EVM.07791-RA/Caur.EVM.31667-RA/Caur.EVM.16255-RA/Caur.EVM.37628-RA/Caur.EVM.07466-RA/Caur.EVM.38151-RA/Caur.EVM.12821-RA/Caur.EVM.20707-RA/Caur.EVM.27407-RA/Caur.EVM.09898-RA/Caur.EVM.37225-RA/Caur.EVM.33913-RA/Caur.EVM.21005-RA/Cau…	57
ko00514	ko00514	Other types of O-glycan biosynthesis	54/9278	82/17241	0.0179535	0.305958	0.287414	Caur.EVM.35640-RA/Caur.EVM.01361-RA/Caur.EVM.21302-RA/Caur.EVM.17606-RA/Caur.EVM.20219-RA/Caur.EVM.03585-RA/Caur.EVM.21161-RA/Caur.EVM.30256-RA/Caur.EVM.16893-RA/Caur.EVM.05133-RA/Caur.EVM.20408-RA/Caur.EVM.26549-RA/Caur.EVM.25923-RA/Caur.EVM.33913-RA/Caur.EVM.01213-RA/Caur.EVM.23111-RA/Caur.EVM.31906-RA/Caur.EVM.38938-RA/Caur.EVM.15291-RA/Caur.EVM.33222-RA/Caur.EVM.06839-RA/Caur.EVM.23570-RA/Cau…	54
ko04727	ko04727	GABAergic synapse	109/9278	177/17241	0.0218636	0.338893	0.318352	Caur.EVM.27026-RA/Caur.EVM.34541-RA/Caur.EVM.31397-RA/Caur.EVM.06093-RA/Caur.EVM.11519-RA/Caur.EVM.06479-RA/Caur.EVM.23010-RA/Caur.EVM.24916-RA/Caur.EVM.01273-RA/Caur.EVM.19767-RA/Caur.EVM.14732-RA/Caur.EVM.21453-RA/Caur.EVM.32358-RA/Caur.EVM.07812-RA/Caur.EVM.16907-RA/Caur.EVM.14936-RA/Caur.EVM.33657-RA/Caur.EVM.26263-RA/Caur.EVM.22847-RA/Caur.EVM.28314-RA/Caur.EVM.26055-RA/Caur.EVM.02066-RA/Cau…	109
ko04911	ko04911	Insulin secretion	98/9278	158/17241	0.0222625	0.338893	0.318352	Caur.EVM.27026-RA/Caur.EVM.31022-RA/Caur.EVM.09197-RA/Caur.EVM.19767-RA/Caur.EVM.37261-RA/Caur.EVM.14732-RA/Caur.EVM.38659-RA/Caur.EVM.07812-RA/Caur.EVM.14936-RA/Caur.EVM.26263-RA/Caur.EVM.06513-RA/Caur.EVM.26055-RA/Caur.EVM.13245-RA/Caur.EVM.31562-RA/Caur.EVM.08190-RA/Caur.EVM.13785-RA/Caur.EVM.22281-RA/Caur.EVM.31271-RA/Caur.EVM.31553-RA/Caur.EVM.10488-RA/Caur.EVM.18043-RA/Caur.EVM.34614-RA/Cau…	98
ko04015	ko04015	Rap1 signaling pathway	251/9278	428/17241	0.0235334	0.338893	0.318352	Caur.EVM.27026-RA/Caur.EVM.05301-RA/Caur.EVM.21713-RA/Caur.EVM.33870-RA/Caur.EVM.31022-RA/Caur.EVM.06479-RA/Caur.EVM.09197-RA/Caur.EVM.22754-RA/Caur.EVM.19747-RA/Caur.EVM.02697-RA/Caur.EVM.38066-RA/Caur.EVM.10529-RA/Caur.EVM.31388-RA/Caur.EVM.01273-RA/Caur.EVM.11516-RA/Caur.EVM.14732-RA/Caur.EVM.01531-RA/Caur.EVM.07812-RA/Caur.EVM.11569-RA/Caur.EVM.34898-RA/Caur.EVM.17192-RA/Caur.EVM.14936-RA/Cau…	251
ko04060	ko04060	Cytokine-cytokine receptor interaction	189/9278	318/17241	0.0239685	0.338893	0.318352	Caur.EVM.10112-RA/Caur.EVM.18321-RA/Caur.EVM.10322-RA/Caur.EVM.10111-RA/Caur.EVM.02960-RA/Caur.EVM.05187-RA/Caur.EVM.28745-RA/Caur.EVM.19377-RA/Caur.EVM.09429-RA/Caur.EVM.13327-RA/Caur.EVM.10995-RA/Caur.EVM.28716-RA/Caur.EVM.16205-RA/Caur.EVM.08025-RA/Caur.EVM.03229-RA/Caur.EVM.27976-RA/Caur.EVM.30386-RA/Caur.EVM.05442-RA/Caur.EVM.06850-RA/Caur.EVM.15656-RA/Caur.EVM.02598-RA/Caur.EVM.24018-RA/Cau…	189
ko04611	ko04611	Platelet activation	155/9278	258/17241	0.0240291	0.338893	0.318352	Caur.EVM.27026-RA/Caur.EVM.20518-RA/Caur.EVM.06479-RA/Caur.EVM.09197-RA/Caur.EVM.19747-RA/Caur.EVM.08615-RA/Caur.EVM.34322-RA/Caur.EVM.23333-RA/Caur.EVM.38066-RA/Caur.EVM.27238-RA/Caur.EVM.37064-RA/Caur.EVM.17604-RA/Caur.EVM.01273-RA/Caur.EVM.19767-RA/Caur.EVM.24408-RA/Caur.EVM.11516-RA/Caur.EVM.06884-RA/Caur.EVM.14732-RA/Caur.EVM.14391-RA/Caur.EVM.13941-RA/Caur.EVM.07142-RA/Caur.EVM.01531-RA/Cau…	155
ko04640	ko04640	Hematopoietic cell lineage	72/9278	114/17241	0.0271874	0.36815	0.345837	Caur.EVM.20914-RA/Caur.EVM.28050-RA/Caur.EVM.05442-RA/Caur.EVM.30083-RA/Caur.EVM.12349-RA/Caur.EVM.24802-RA/Caur.EVM.24201-RA/Caur.EVM.24200-RA/Caur.EVM.03806-RA/Caur.EVM.23487-RA/Caur.EVM.08555-RA/Caur.EVM.31544-RA/Caur.EVM.26880-RA/Caur.EVM.01813-RA/Caur.EVM.35172-RA/Caur.EVM.27348-RA/Caur.EVM.26749-RA/Caur.EVM.14024-RA/Caur.EVM.24953-RA/Caur.EVM.27991-RA/Caur.EVM.24266-RA/Caur.EVM.25633-RA/Cau…	72
ko04742	ko04742	Taste transduction	62/9278	97/17241	0.0280168	0.36815	0.345837	Caur.EVM.10154-RA/Caur.EVM.07937-RA/Caur.EVM.19767-RA/Caur.EVM.07812-RA/Caur.EVM.02066-RA/Caur.EVM.26190-RA/Caur.EVM.06738-RA/Caur.EVM.25132-RA/Caur.EVM.10488-RA/Caur.EVM.12558-RA/Caur.EVM.38083-RA/Caur.EVM.14660-RA/Caur.EVM.27941-RA/Caur.EVM.38172-RA/Caur.EVM.03502-RA/Caur.EVM.18368-RA/Caur.EVM.34670-RA/Caur.EVM.00415-RA/Caur.EVM.34583-RA/Caur.EVM.36157-RA/Caur.EVM.21134-RA/Caur.EVM.13283-RA/Cau…	62
ko04918	ko04918	Thyroid hormone synthesis	80/9278	128/17241	0.0288039	0.36815	0.345837	Caur.EVM.27026-RA/Caur.EVM.20511-RA/Caur.EVM.02541-RA/Caur.EVM.24580-RA/Caur.EVM.18072-RA/Caur.EVM.09197-RA/Caur.EVM.08154-RA/Caur.EVM.19767-RA/Caur.EVM.37261-RA/Caur.EVM.17073-RA/Caur.EVM.14732-RA/Caur.EVM.38659-RA/Caur.EVM.20510-RA/Caur.EVM.07812-RA/Caur.EVM.14936-RA/Caur.EVM.26263-RA/Caur.EVM.06513-RA/Caur.EVM.13245-RA/Caur.EVM.31562-RA/Caur.EVM.12015-RA/Caur.EVM.05128-RA/Caur.EVM.13785-RA/Cau…	80
ko05033	ko05033	Nicotine addiction	63/9278	99/17241	0.0303701	0.376405	0.353591	Caur.EVM.23010-RA/Caur.EVM.16907-RA/Caur.EVM.07957-RA/Caur.EVM.22847-RA/Caur.EVM.02066-RA/Caur.EVM.08325-RA/Caur.EVM.27557-RA/Caur.EVM.05672-RA/Caur.EVM.31681-RA/Caur.EVM.19280-RA/Caur.EVM.29591-RA/Caur.EVM.02067-RA/Caur.EVM.07909-RA/Caur.EVM.00263-RA/Caur.EVM.04770-RA/Caur.EVM.32708-RA/Caur.EVM.37173-RA/Caur.EVM.34843-RA/Caur.EVM.00955-RA/Caur.EVM.09522-RA/Caur.EVM.20880-RA/Caur.EVM.34583-RA/Cau…	63
ko04971	ko04971	Gastric acid secretion	89/9278	144/17241	0.0317565	0.382011	0.358858	Caur.EVM.27026-RA/Caur.EVM.06479-RA/Caur.EVM.09197-RA/Caur.EVM.19165-RA/Caur.EVM.01273-RA/Caur.EVM.19767-RA/Caur.EVM.37261-RA/Caur.EVM.14732-RA/Caur.EVM.38659-RA/Caur.EVM.07812-RA/Caur.EVM.17192-RA/Caur.EVM.31537-RA/Caur.EVM.14936-RA/Caur.EVM.33657-RA/Caur.EVM.26263-RA/Caur.EVM.06513-RA/Caur.EVM.13245-RA/Caur.EVM.18258-RA/Caur.EVM.13785-RA/Caur.EVM.22281-RA/Caur.EVM.31271-RA/Caur.EVM.18409-RA/Cau…	89
ko05416	ko05416	Viral myocarditis	58/9278	91/17241	0.035297	0.394678	0.370757	Caur.EVM.34113-RA/Caur.EVM.39171-RA/Caur.EVM.23394-RA/Caur.EVM.31388-RA/Caur.EVM.14239-RA/Caur.EVM.37315-RA/Caur.EVM.33242-RA/Caur.EVM.12828-RA/Caur.EVM.16606-RA/Caur.EVM.15468-RA/Caur.EVM.14238-RA/Caur.EVM.14312-RA/Caur.EVM.36016-RA/Caur.EVM.10746-RA/Caur.EVM.24802-RA/Caur.EVM.14240-RA/Caur.EVM.24201-RA/Caur.EVM.24200-RA/Caur.EVM.17910-RA/Caur.EVM.29444-RA/Caur.EVM.09042-RA/Caur.EVM.38711-RA/Cau…	58
ko05217	ko05217	Basal cell carcinoma	92/9278	150/17241	0.0375565	0.394678	0.370757	Caur.EVM.00956-RA/Caur.EVM.33870-RA/Caur.EVM.10111-RA/Caur.EVM.08217-RA/Caur.EVM.11520-RA/Caur.EVM.33246-RA/Caur.EVM.31395-RA/Caur.EVM.03315-RA/Caur.EVM.22754-RA/Caur.EVM.26557-RA/Caur.EVM.13327-RA/Caur.EVM.24881-RA/Caur.EVM.31233-RA/Caur.EVM.12143-RA/Caur.EVM.12612-RA/Caur.EVM.26640-RA/Caur.EVM.21776-RA/Caur.EVM.03451-RA/Caur.EVM.18952-RA/Caur.EVM.18137-RA/Caur.EVM.27171-RA/Caur.EVM.13041-RA/Cau…	92
ko04672	ko04672	Intestinal immune network for IgA production	30/9278	44/17241	0.0376629	0.394678	0.370757	Caur.EVM.12554-RA/Caur.EVM.34666-RA/Caur.EVM.10031-RA/Caur.EVM.16485-RA/Caur.EVM.24802-RA/Caur.EVM.24201-RA/Caur.EVM.24200-RA/Caur.EVM.07206-RA/Caur.EVM.07232-RA/Caur.EVM.24953-RA/Caur.EVM.24266-RA/Caur.EVM.34853-RA/Caur.EVM.13109-RA/Caur.EVM.32970-RA/Caur.EVM.24265-RA/Caur.EVM.24862-RA/Caur.EVM.17625-RA/Caur.EVM.30794-RA/Caur.EVM.24952-RA/Caur.EVM.28738-RA/Caur.EVM.14549-RA/Caur.EVM.13956-RA/Cau…	30
ko05206	ko05206	MicroRNAs in cancer	185/9278	314/17241	0.0377302	0.394678	0.370757	Caur.EVM.22439-RA/Caur.EVM.30864-RA/Caur.EVM.02145-RA/Caur.EVM.19029-RA/Caur.EVM.09321-RA/Caur.EVM.02955-RA/Caur.EVM.24029-RA/Caur.EVM.04636-RA/Caur.EVM.23634-RA/Caur.EVM.24581-RA/Caur.EVM.21729-RA/Caur.EVM.19747-RA/Caur.EVM.02697-RA/Caur.EVM.38066-RA/Caur.EVM.11833-RA/Caur.EVM.35311-RA/Caur.EVM.09715-RA/Caur.EVM.35371-RA/Caur.EVM.08347-RA/Caur.EVM.11516-RA/Caur.EVM.05564-RA/Caur.EVM.10544-RA/Cau…	185
ko01040	ko01040	Biosynthesis of unsaturated fatty acids	33/9278	49/17241	0.0380487	0.394678	0.370757	Caur.EVM.01290-RA/Caur.EVM.33676-RA/Caur.EVM.16158-RA/Caur.EVM.12245-RA/Caur.EVM.34543-RA/Caur.EVM.29880-RA/Caur.EVM.08286-RA/Caur.EVM.06095-RA/Caur.EVM.33309-RA/Caur.EVM.23028-RA/Caur.EVM.11311-RA/Caur.EVM.32885-RA/Caur.EVM.00412-RA/Caur.EVM.32519-RA/Caur.EVM.17089-RA/Caur.EVM.16371-RA/Caur.EVM.21511-RA/Caur.EVM.22487-RA/Caur.EVM.31496-RA/Caur.EVM.38534-RA/Caur.EVM.29177-RA/Caur.EVM.08461-RA/Cau…	33
ko00531	ko00531	Glycosaminoglycan degradation	22/9278	31/17241	0.0394771	0.394678	0.370757	Caur.EVM.09030-RA/Caur.EVM.22097-RA/Caur.EVM.00495-RA/Caur.EVM.38049-RA/Caur.EVM.24780-RA/Caur.EVM.08139-RA/Caur.EVM.00072-RA/Caur.EVM.34385-RA/Caur.EVM.32676-RA/Caur.EVM.06469-RA/Caur.EVM.30680-RA/Caur.EVM.19501-RA/Caur.EVM.04355-RA/Caur.EVM.36166-RA/Caur.EVM.22111-RA/Caur.EVM.00510-RA/Caur.EVM.28885-RA/Caur.EVM.29042-RA/Caur.EVM.09628-RA/Caur.EVM.01326-RA/Caur.EVM.37814-RA/Caur.EVM.18910-RA	22
ko04091	ko04091	Lectins [BR:ko04091]	63/9278	100/17241	0.0395643	0.394678	0.370757	Caur.EVM.38162-RA/Caur.EVM.20323-RA/Caur.EVM.00454-RA/Caur.EVM.29923-RA/Caur.EVM.04435-RA/Caur.EVM.19619-RA/Caur.EVM.19099-RA/Caur.EVM.33257-RA/Caur.EVM.05128-RA/Caur.EVM.03578-RA/Caur.EVM.07802-RA/Caur.EVM.10999-RA/Caur.EVM.32859-RA/Caur.EVM.05267-RA/Caur.EVM.36320-RA/Caur.EVM.11901-RA/Caur.EVM.09642-RA/Caur.EVM.05857-RA/Caur.EVM.29607-RA/Caur.EVM.17356-RA/Caur.EVM.34351-RA/Caur.EVM.26602-RA/Cau…	63
ko00532	ko00532	Glycosaminoglycan biosynthesis - chondroitin sulfate / dermatan sulfate	28/9278	41/17241	0.0427379	0.416186	0.390961	Caur.EVM.16737-RA/Caur.EVM.26600-RA/Caur.EVM.36164-RA/Caur.EVM.30324-RA/Caur.EVM.13711-RA/Caur.EVM.29588-RA/Caur.EVM.22891-RA/Caur.EVM.18674-RA/Caur.EVM.08399-RA/Caur.EVM.12415-RA/Caur.EVM.37985-RA/Caur.EVM.18416-RA/Caur.EVM.16478-RA/Caur.EVM.37964-RA/Caur.EVM.01641-RA/Caur.EVM.08832-RA/Caur.EVM.07659-RA/Caur.EVM.36193-RA/Caur.EVM.27879-RA/Caur.EVM.28043-RA/Caur.EVM.15946-RA/Caur.EVM.12597-RA/Cau…	28
ko00940	ko00940	Phenylpropanoid biosynthesis	5/9278	5/17241	0.0451069	0.42904	0.403036	Caur.EVM.14704-RA/Caur.EVM.33184-RA/Caur.EVM.26233-RA/Caur.EVM.08532-RA/Caur.EVM.32315-RA	5
ko04612	ko04612	Antigen processing and presentation	70/9278	113/17241	0.0493196	0.458448	0.430662	Caur.EVM.20606-RA/Caur.EVM.05445-RA/Caur.EVM.20323-RA/Caur.EVM.36707-RA/Caur.EVM.38296-RA/Caur.EVM.33673-RA/Caur.EVM.17243-RA/Caur.EVM.04008-RA/Caur.EVM.27601-RA/Caur.EVM.00454-RA/Caur.EVM.15171-RA/Caur.EVM.29573-RA/Caur.EVM.29521-RA/Caur.EVM.37113-RA/Caur.EVM.17245-RA/Caur.EVM.04453-RA/Caur.EVM.05373-RA/Caur.EVM.17244-RA/Caur.EVM.02509-RA/Caur.EVM.01287-RA/Caur.EVM.05128-RA/Caur.EVM.03836-RA/Cau…	70
