# Supplementary material for: Formation of autotriploid Carassius auratus and its fertility-related genes analysis
Source: Research Square preprint supplement (doi:10.21203/rs.3.rs-397574/v1), 2021-04-13
Supplement: Supplementary file 13 [file fdb6bc071076489b06c3e296.xlsx]

## Sheet: Sheet1
Additional file 2: Table S2. Gene classification based on gene ontology (GO) for DEGs in F3nRR vs FRCC
	ONTOLOGY	ID	Description	pvalue	p.adjust	qvalue	geneID	Count
GO:0012502	BP	GO:0012502	induction of programmed cell death	2.57e-05	0.0995673	0.0982656	Caur.EVM.30598-RA/Caur.EVM.30544-RA/Caur.EVM.11043-RA/Caur.EVM.07496-RA/Caur.EVM.38517-RA/Caur.EVM.22540-RA/Caur.EVM.11833-RA/Caur.EVM.04013-RA/Caur.EVM.14239-RA/Caur.EVM.36979-RA/Caur.EVM.26561-RA/Caur.EVM.05380-RA/Caur.EVM.03585-RA/Caur.EVM.27475-RA/Caur.EVM.01522-RA/Caur.EVM.14238-RA/Caur.EVM.36359-RA/Caur.EVM.15994-RA/Caur.EVM.10646-RA/Caur.EVM.11553-RA/Caur.EVM.14240-RA/Caur.EVM.33391-RA/Cau…	83
GO:0030903	BP	GO:0030903	notochord development	0.000420463	0.451655	0.44575	Caur.EVM.00956-RA/Caur.EVM.10111-RA/Caur.EVM.03732-RA/Caur.EVM.07050-RA/Caur.EVM.13327-RA/Caur.EVM.06565-RA/Caur.EVM.14410-RA/Caur.EVM.36319-RA/Caur.EVM.29310-RA/Caur.EVM.23098-RA/Caur.EVM.13679-RA/Caur.EVM.34437-RA/Caur.EVM.30386-RA/Caur.EVM.12834-RA/Caur.EVM.29335-RA/Caur.EVM.25806-RA/Caur.EVM.14230-RA/Caur.EVM.02370-RA/Caur.EVM.17862-RA/Caur.EVM.09317-RA/Caur.EVM.33249-RA/Caur.EVM.02339-RA/Cau…	70
GO:0090257	BP	GO:0090257	regulation of muscle system process	0.000470301	0.451655	0.44575	Caur.EVM.38296-RA/Caur.EVM.37501-RA/Caur.EVM.14597-RA/Caur.EVM.08505-RA/Caur.EVM.33713-RA/Caur.EVM.15340-RA/Caur.EVM.39018-RA/Caur.EVM.00531-RA/Caur.EVM.33703-RA/Caur.EVM.38295-RA/Caur.EVM.37388-RA/Caur.EVM.01339-RA/Caur.EVM.23770-RA/Caur.EVM.35530-RA/Caur.EVM.14849-RA/Caur.EVM.04115-RA/Caur.EVM.10048-RA/Caur.EVM.13141-RA/Caur.EVM.36482-RA/Caur.EVM.01684-RA/Caur.EVM.17391-RA/Caur.EVM.34355-RA/Cau…	40
GO:0060914	BP	GO:0060914	heart formation	0.000662587	0.451655	0.44575	Caur.EVM.33870-RA/Caur.EVM.10111-RA/Caur.EVM.22754-RA/Caur.EVM.13327-RA/Caur.EVM.26738-RA/Caur.EVM.23426-RA/Caur.EVM.11020-RA/Caur.EVM.36338-RA/Caur.EVM.30091-RA/Caur.EVM.38286-RA/Caur.EVM.13245-RA/Caur.EVM.02865-RA/Caur.EVM.14387-RA/Caur.EVM.30251-RA/Caur.EVM.03610-RA/Caur.EVM.18043-RA/Caur.EVM.34474-RA/Caur.EVM.33703-RA/Caur.EVM.19001-RA/Caur.EVM.30195-RA/Caur.EVM.15511-RA/Caur.EVM.32869-RA/Cau…	35
GO:0048645	BP	GO:0048645	animal organ formation	0.000670608	0.451655	0.44575	Caur.EVM.33870-RA/Caur.EVM.10111-RA/Caur.EVM.17389-RA/Caur.EVM.02581-RA/Caur.EVM.22754-RA/Caur.EVM.34451-RA/Caur.EVM.13327-RA/Caur.EVM.22498-RA/Caur.EVM.26738-RA/Caur.EVM.23426-RA/Caur.EVM.11020-RA/Caur.EVM.00886-RA/Caur.EVM.27892-RA/Caur.EVM.36338-RA/Caur.EVM.30091-RA/Caur.EVM.38286-RA/Caur.EVM.13245-RA/Caur.EVM.02865-RA/Caur.EVM.14387-RA/Caur.EVM.18515-RA/Caur.EVM.30251-RA/Caur.EVM.03610-RA/Cau…	56
GO:0045687	BP	GO:0045687	positive regulation of glial cell differentiation	0.000798117	0.451655	0.44575	Caur.EVM.10111-RA/Caur.EVM.13327-RA/Caur.EVM.23034-RA/Caur.EVM.18207-RA/Caur.EVM.17083-RA/Caur.EVM.34119-RA/Caur.EVM.19411-RA/Caur.EVM.15029-RA/Caur.EVM.33216-RA/Caur.EVM.32341-RA/Caur.EVM.17969-RA/Caur.EVM.17970-RA	12
GO:0003179	BP	GO:0003179	heart valve morphogenesis	0.000815471	0.451655	0.44575	Caur.EVM.10111-RA/Caur.EVM.36361-RA/Caur.EVM.13327-RA/Caur.EVM.11020-RA/Caur.EVM.36338-RA/Caur.EVM.00245-RA/Caur.EVM.33703-RA/Caur.EVM.27117-RA/Caur.EVM.32869-RA/Caur.EVM.15209-RA/Caur.EVM.11078-RA/Caur.EVM.34355-RA/Caur.EVM.01882-RA/Caur.EVM.05257-RA/Caur.EVM.31936-RA/Caur.EVM.38361-RA/Caur.EVM.20038-RA/Caur.EVM.19579-RA/Caur.EVM.08656-RA/Caur.EVM.04740-RA/Caur.EVM.13144-RA	21
GO:0006937	BP	GO:0006937	regulation of muscle contraction	0.00138658	0.67197	0.663185	Caur.EVM.38296-RA/Caur.EVM.14597-RA/Caur.EVM.08505-RA/Caur.EVM.33713-RA/Caur.EVM.15340-RA/Caur.EVM.39018-RA/Caur.EVM.38295-RA/Caur.EVM.01339-RA/Caur.EVM.23770-RA/Caur.EVM.35530-RA/Caur.EVM.14849-RA/Caur.EVM.04115-RA/Caur.EVM.36482-RA/Caur.EVM.01684-RA/Caur.EVM.17391-RA/Caur.EVM.33407-RA/Caur.EVM.37019-RA/Caur.EVM.10710-RA/Caur.EVM.04300-RA/Caur.EVM.15363-RA/Caur.EVM.33688-RA/Caur.EVM.14880-RA/Cau…	31
GO:0003181	BP	GO:0003181	atrioventricular valve morphogenesis	0.00160444	0.691159	0.682123	Caur.EVM.10111-RA/Caur.EVM.36361-RA/Caur.EVM.13327-RA/Caur.EVM.11020-RA/Caur.EVM.36338-RA/Caur.EVM.27117-RA/Caur.EVM.32869-RA/Caur.EVM.15209-RA/Caur.EVM.11078-RA/Caur.EVM.01882-RA/Caur.EVM.05257-RA/Caur.EVM.31936-RA/Caur.EVM.38361-RA/Caur.EVM.20038-RA/Caur.EVM.19579-RA/Caur.EVM.04740-RA/Caur.EVM.13144-RA	17
GO:0002040	BP	GO:0002040	sprouting angiogenesis	0.00235018	0.699718	0.690571	Caur.EVM.38156-RA/Caur.EVM.03649-RA/Caur.EVM.27934-RA/Caur.EVM.19788-RA/Caur.EVM.07527-RA/Caur.EVM.02598-RA/Caur.EVM.08176-RA/Caur.EVM.21479-RA/Caur.EVM.16485-RA/Caur.EVM.28136-RA/Caur.EVM.07734-RA/Caur.EVM.07796-RA/Caur.EVM.24636-RA/Caur.EVM.16380-RA/Caur.EVM.34474-RA/Caur.EVM.18694-RA/Caur.EVM.29607-RA/Caur.EVM.36026-RA/Caur.EVM.04146-RA/Caur.EVM.35170-RA/Caur.EVM.08228-RA/Caur.EVM.22775-RA/Cau…	62
GO:0045664	BP	GO:0045664	regulation of neuron differentiation	0.00237461	0.699718	0.690571	Caur.EVM.10111-RA/Caur.EVM.37453-RA/Caur.EVM.19653-RA/Caur.EVM.13327-RA/Caur.EVM.37937-RA/Caur.EVM.06565-RA/Caur.EVM.11833-RA/Caur.EVM.19518-RA/Caur.EVM.16778-RA/Caur.EVM.21309-RA/Caur.EVM.27892-RA/Caur.EVM.00056-RA/Caur.EVM.29310-RA/Caur.EVM.38245-RA/Caur.EVM.23034-RA/Caur.EVM.30559-RA/Caur.EVM.31263-RA/Caur.EVM.35478-RA/Caur.EVM.21009-RA/Caur.EVM.18355-RA/Caur.EVM.00179-RA/Caur.EVM.29700-RA/Cau…	194
GO:0007566	BP	GO:0007566	embryo implantation	0.00262311	0.699718	0.690571	Caur.EVM.34903-RA/Caur.EVM.28086-RA/Caur.EVM.23770-RA/Caur.EVM.33717-RA/Caur.EVM.07851-RA/Caur.EVM.23823-RA/Caur.EVM.06188-RA/Caur.EVM.06146-RA/Caur.EVM.34340-RA/Caur.EVM.26814-RA	10
GO:0048714	BP	GO:0048714	positive regulation of oligodendrocyte differentiation	0.00262311	0.699718	0.690571	Caur.EVM.23034-RA/Caur.EVM.18207-RA/Caur.EVM.17083-RA/Caur.EVM.34119-RA/Caur.EVM.19411-RA/Caur.EVM.15029-RA/Caur.EVM.33216-RA/Caur.EVM.32341-RA/Caur.EVM.17969-RA/Caur.EVM.17970-RA	10
GO:0060070	BP	GO:0060070	canonical Wnt signaling pathway	0.00281593	0.699718	0.690571	Caur.EVM.00956-RA/Caur.EVM.33870-RA/Caur.EVM.26232-RA/Caur.EVM.08217-RA/Caur.EVM.31909-RA/Caur.EVM.35270-RA/Caur.EVM.14703-RA/Caur.EVM.08459-RA/Caur.EVM.03315-RA/Caur.EVM.22754-RA/Caur.EVM.26557-RA/Caur.EVM.07496-RA/Caur.EVM.38532-RA/Caur.EVM.37937-RA/Caur.EVM.11833-RA/Caur.EVM.20466-RA/Caur.EVM.31233-RA/Caur.EVM.32089-RA/Caur.EVM.12612-RA/Caur.EVM.11044-RA/Caur.EVM.14410-RA/Caur.EVM.26640-RA/Cau…	121
GO:0010038	BP	GO:0010038	response to metal ion	0.00321137	0.699718	0.690571	Caur.EVM.26232-RA/Caur.EVM.14703-RA/Caur.EVM.07014-RA/Caur.EVM.34307-RA/Caur.EVM.17243-RA/Caur.EVM.38517-RA/Caur.EVM.11833-RA/Caur.EVM.29573-RA/Caur.EVM.24059-RA/Caur.EVM.22849-RA/Caur.EVM.29521-RA/Caur.EVM.16405-RA/Caur.EVM.37534-RA/Caur.EVM.17245-RA/Caur.EVM.11868-RA/Caur.EVM.17244-RA/Caur.EVM.03836-RA/Caur.EVM.07654-RA/Caur.EVM.36758-RA/Caur.EVM.16687-RA/Caur.EVM.14240-RA/Caur.EVM.36983-RA/Cau…	99
GO:0003171	BP	GO:0003171	atrioventricular valve development	0.00328635	0.699718	0.690571	Caur.EVM.10111-RA/Caur.EVM.36361-RA/Caur.EVM.13327-RA/Caur.EVM.11020-RA/Caur.EVM.36338-RA/Caur.EVM.27117-RA/Caur.EVM.32869-RA/Caur.EVM.15209-RA/Caur.EVM.11078-RA/Caur.EVM.01882-RA/Caur.EVM.05257-RA/Caur.EVM.31738-RA/Caur.EVM.31936-RA/Caur.EVM.38361-RA/Caur.EVM.20038-RA/Caur.EVM.19579-RA/Caur.EVM.04740-RA/Caur.EVM.13144-RA	18
GO:0030728	BP	GO:0030728	ovulation	0.00421087	0.699718	0.690571	Caur.EVM.11110-RA/Caur.EVM.23034-RA/Caur.EVM.19290-RA/Caur.EVM.27570-RA/Caur.EVM.32638-RA/Caur.EVM.17083-RA/Caur.EVM.15234-RA/Caur.EVM.39018-RA/Caur.EVM.20791-RA/Caur.EVM.35879-RA/Caur.EVM.16046-RA/Caur.EVM.23770-RA/Caur.EVM.21236-RA/Caur.EVM.07669-RA/Caur.EVM.36482-RA/Caur.EVM.19079-RA/Caur.EVM.06146-RA/Caur.EVM.15155-RA/Caur.EVM.14226-RA/Caur.EVM.32713-RA/Caur.EVM.02394-RA/Caur.EVM.14850-RA/Cau…	24
GO:0048318	BP	GO:0048318	axial mesoderm development	0.00421087	0.699718	0.690571	Caur.EVM.06565-RA/Caur.EVM.12612-RA/Caur.EVM.00886-RA/Caur.EVM.36319-RA/Caur.EVM.29310-RA/Caur.EVM.21776-RA/Caur.EVM.12405-RA/Caur.EVM.14748-RA/Caur.EVM.08742-RA/Caur.EVM.25513-RA/Caur.EVM.24133-RA/Caur.EVM.32232-RA/Caur.EVM.38793-RA/Caur.EVM.16445-RA/Caur.EVM.11978-RA/Caur.EVM.01989-RA/Caur.EVM.09212-RA/Caur.EVM.36107-RA/Caur.EVM.27030-RA/Caur.EVM.08348-RA/Caur.EVM.21251-RA/Caur.EVM.09058-RA/Cau…	24
GO:0030500	BP	GO:0030500	regulation of bone mineralization	0.00426465	0.699718	0.690571	Caur.EVM.10111-RA/Caur.EVM.34451-RA/Caur.EVM.13327-RA/Caur.EVM.30386-RA/Caur.EVM.02865-RA/Caur.EVM.14230-RA/Caur.EVM.05194-RA/Caur.EVM.11491-RA/Caur.EVM.33703-RA/Caur.EVM.35656-RA/Caur.EVM.28763-RA/Caur.EVM.04720-RA/Caur.EVM.13160-RA/Caur.EVM.10135-RA/Caur.EVM.27096-RA/Caur.EVM.04467-RA/Caur.EVM.34853-RA/Caur.EVM.34355-RA/Caur.EVM.04067-RA/Caur.EVM.01088-RA/Caur.EVM.38342-RA/Caur.EVM.13304-RA/Cau…	26
GO:0070167	BP	GO:0070167	regulation of biomineral tissue development	0.00426465	0.699718	0.690571	Caur.EVM.10111-RA/Caur.EVM.34451-RA/Caur.EVM.13327-RA/Caur.EVM.30386-RA/Caur.EVM.02865-RA/Caur.EVM.14230-RA/Caur.EVM.05194-RA/Caur.EVM.11491-RA/Caur.EVM.33703-RA/Caur.EVM.35656-RA/Caur.EVM.28763-RA/Caur.EVM.04720-RA/Caur.EVM.13160-RA/Caur.EVM.10135-RA/Caur.EVM.27096-RA/Caur.EVM.04467-RA/Caur.EVM.34853-RA/Caur.EVM.34355-RA/Caur.EVM.04067-RA/Caur.EVM.01088-RA/Caur.EVM.38342-RA/Caur.EVM.13304-RA/Cau…	26
GO:0014015	BP	GO:0014015	positive regulation of gliogenesis	0.00426713	0.699718	0.690571	Caur.EVM.10111-RA/Caur.EVM.13327-RA/Caur.EVM.23034-RA/Caur.EVM.36979-RA/Caur.EVM.18207-RA/Caur.EVM.17083-RA/Caur.EVM.34119-RA/Caur.EVM.19411-RA/Caur.EVM.15029-RA/Caur.EVM.33216-RA/Caur.EVM.29560-RA/Caur.EVM.32341-RA/Caur.EVM.14788-RA/Caur.EVM.17969-RA/Caur.EVM.17970-RA	15
GO:0050767	BP	GO:0050767	regulation of neurogenesis	0.0047577	0.699718	0.690571	Caur.EVM.10111-RA/Caur.EVM.37453-RA/Caur.EVM.19653-RA/Caur.EVM.07496-RA/Caur.EVM.13327-RA/Caur.EVM.37937-RA/Caur.EVM.06565-RA/Caur.EVM.11833-RA/Caur.EVM.19518-RA/Caur.EVM.16778-RA/Caur.EVM.12143-RA/Caur.EVM.21309-RA/Caur.EVM.27892-RA/Caur.EVM.00056-RA/Caur.EVM.29310-RA/Caur.EVM.38245-RA/Caur.EVM.23034-RA/Caur.EVM.30559-RA/Caur.EVM.21231-RA/Caur.EVM.31263-RA/Caur.EVM.35478-RA/Caur.EVM.21009-RA/Cau…	240
GO:0071804	BP	GO:0071804	cellular potassium ion transport	0.00493762	0.699718	0.690571	Caur.EVM.24335-RA/Caur.EVM.13245-RA/Caur.EVM.01094-RA/Caur.EVM.18043-RA/Caur.EVM.33136-RA/Caur.EVM.24256-RA/Caur.EVM.13523-RA/Caur.EVM.04186-RA/Caur.EVM.28599-RA/Caur.EVM.16248-RA/Caur.EVM.24790-RA/Caur.EVM.13845-RA/Caur.EVM.33639-RA/Caur.EVM.07586-RA/Caur.EVM.18478-RA/Caur.EVM.30001-RA/Caur.EVM.04115-RA/Caur.EVM.35255-RA/Caur.EVM.05090-RA/Caur.EVM.11440-RA/Caur.EVM.18925-RA/Caur.EVM.26624-RA/Cau…	72
GO:0071805	BP	GO:0071805	potassium ion transmembrane transport	0.00493762	0.699718	0.690571	Caur.EVM.24335-RA/Caur.EVM.13245-RA/Caur.EVM.01094-RA/Caur.EVM.18043-RA/Caur.EVM.33136-RA/Caur.EVM.24256-RA/Caur.EVM.13523-RA/Caur.EVM.04186-RA/Caur.EVM.28599-RA/Caur.EVM.16248-RA/Caur.EVM.24790-RA/Caur.EVM.13845-RA/Caur.EVM.33639-RA/Caur.EVM.07586-RA/Caur.EVM.18478-RA/Caur.EVM.30001-RA/Caur.EVM.04115-RA/Caur.EVM.35255-RA/Caur.EVM.05090-RA/Caur.EVM.11440-RA/Caur.EVM.18925-RA/Caur.EVM.26624-RA/Cau…	72
GO:0046843	BP	GO:0046843	dorsal appendage formation	0.0050934	0.699718	0.690571	Caur.EVM.10111-RA/Caur.EVM.13327-RA/Caur.EVM.37501-RA/Caur.EVM.12882-RA/Caur.EVM.25448-RA/Caur.EVM.14368-RA/Caur.EVM.36016-RA/Caur.EVM.28835-RA/Caur.EVM.06753-RA/Caur.EVM.09771-RA/Caur.EVM.05985-RA/Caur.EVM.20139-RA	12
GO:0001701	BP	GO:0001701	in utero embryonic development	0.00554818	0.699718	0.690571	Caur.EVM.10111-RA/Caur.EVM.36361-RA/Caur.EVM.17389-RA/Caur.EVM.02581-RA/Caur.EVM.13327-RA/Caur.EVM.22498-RA/Caur.EVM.30304-RA/Caur.EVM.14597-RA/Caur.EVM.02865-RA/Caur.EVM.12729-RA/Caur.EVM.21479-RA/Caur.EVM.13153-RA/Caur.EVM.08902-RA/Caur.EVM.21030-RA/Caur.EVM.34637-RA/Caur.EVM.04378-RA/Caur.EVM.27249-RA/Caur.EVM.24907-RA/Caur.EVM.13868-RA/Caur.EVM.34485-RA/Caur.EVM.28763-RA/Caur.EVM.12536-RA/Cau…	57
GO:0051960	BP	GO:0051960	regulation of nervous system development	0.00557855	0.699718	0.690571	Caur.EVM.10111-RA/Caur.EVM.37453-RA/Caur.EVM.19653-RA/Caur.EVM.34451-RA/Caur.EVM.07496-RA/Caur.EVM.13327-RA/Caur.EVM.37937-RA/Caur.EVM.06565-RA/Caur.EVM.11833-RA/Caur.EVM.19518-RA/Caur.EVM.16778-RA/Caur.EVM.12143-RA/Caur.EVM.21309-RA/Caur.EVM.27892-RA/Caur.EVM.00056-RA/Caur.EVM.29310-RA/Caur.EVM.38245-RA/Caur.EVM.23034-RA/Caur.EVM.26640-RA/Caur.EVM.30559-RA/Caur.EVM.21231-RA/Caur.EVM.31263-RA/Cau…	272
GO:0045619	BP	GO:0045619	regulation of lymphocyte differentiation	0.00607083	0.699718	0.690571	Caur.EVM.20606-RA/Caur.EVM.05445-RA/Caur.EVM.19653-RA/Caur.EVM.38296-RA/Caur.EVM.24145-RA/Caur.EVM.38120-RA/Caur.EVM.36568-RA/Caur.EVM.11805-RA/Caur.EVM.00572-RA/Caur.EVM.38295-RA/Caur.EVM.15819-RA/Caur.EVM.22179-RA/Caur.EVM.35172-RA/Caur.EVM.04686-RA/Caur.EVM.25283-RA/Caur.EVM.25563-RA/Caur.EVM.29103-RA/Caur.EVM.16446-RA/Caur.EVM.08817-RA/Caur.EVM.14071-RA/Caur.EVM.24862-RA/Caur.EVM.01526-RA/Cau…	27
GO:0042051	BP	GO:0042051	compound eye photoreceptor development	0.00619922	0.699718	0.690571	Caur.EVM.11833-RA/Caur.EVM.38584-RA/Caur.EVM.11110-RA/Caur.EVM.27892-RA/Caur.EVM.23034-RA/Caur.EVM.17083-RA/Caur.EVM.15234-RA/Caur.EVM.36016-RA/Caur.EVM.09583-RA/Caur.EVM.10120-RA/Caur.EVM.04664-RA/Caur.EVM.20272-RA/Caur.EVM.21065-RA/Caur.EVM.11153-RA/Caur.EVM.00172-RA/Caur.EVM.26786-RA/Caur.EVM.13212-RA/Caur.EVM.15846-RA/Caur.EVM.04333-RA/Caur.EVM.15921-RA/Caur.EVM.23139-RA/Caur.EVM.10968-RA/Cau…	23
GO:0003342	BP	GO:0003342	proepicardium development	0.00689546	0.699718	0.690571	Caur.EVM.10111-RA/Caur.EVM.13327-RA/Caur.EVM.16205-RA/Caur.EVM.02865-RA/Caur.EVM.12444-RA/Caur.EVM.06347-RA/Caur.EVM.23823-RA/Caur.EVM.15209-RA/Caur.EVM.01559-RA/Caur.EVM.11078-RA/Caur.EVM.06188-RA/Caur.EVM.01882-RA/Caur.EVM.09966-RA/Caur.EVM.31936-RA	14
GO:0003343	BP	GO:0003343	septum transversum development	0.00689546	0.699718	0.690571	Caur.EVM.10111-RA/Caur.EVM.13327-RA/Caur.EVM.16205-RA/Caur.EVM.02865-RA/Caur.EVM.12444-RA/Caur.EVM.06347-RA/Caur.EVM.23823-RA/Caur.EVM.15209-RA/Caur.EVM.01559-RA/Caur.EVM.11078-RA/Caur.EVM.06188-RA/Caur.EVM.01882-RA/Caur.EVM.09966-RA/Caur.EVM.31936-RA	14
GO:0031641	BP	GO:0031641	regulation of myelination	0.00689546	0.699718	0.690571	Caur.EVM.19653-RA/Caur.EVM.11833-RA/Caur.EVM.23034-RA/Caur.EVM.17083-RA/Caur.EVM.13153-RA/Caur.EVM.19411-RA/Caur.EVM.06141-RA/Caur.EVM.04730-RA/Caur.EVM.15846-RA/Caur.EVM.14071-RA/Caur.EVM.17969-RA/Caur.EVM.23766-RA/Caur.EVM.38888-RA/Caur.EVM.17970-RA	14
GO:0090090	BP	GO:0090090	negative regulation of canonical Wnt signaling pathway	0.0070605	0.699718	0.690571	Caur.EVM.00956-RA/Caur.EVM.08217-RA/Caur.EVM.31909-RA/Caur.EVM.31233-RA/Caur.EVM.12612-RA/Caur.EVM.27667-RA/Caur.EVM.18109-RA/Caur.EVM.02494-RA/Caur.EVM.21776-RA/Caur.EVM.03451-RA/Caur.EVM.15297-RA/Caur.EVM.27887-RA/Caur.EVM.27082-RA/Caur.EVM.36020-RA/Caur.EVM.20027-RA/Caur.EVM.18123-RA/Caur.EVM.01504-RA/Caur.EVM.38325-RA/Caur.EVM.25880-RA/Caur.EVM.37370-RA/Caur.EVM.20519-RA/Caur.EVM.07669-RA/Cau…	41
GO:1902105	BP	GO:1902105	regulation of leukocyte differentiation	0.0072724	0.699718	0.690571	Caur.EVM.20606-RA/Caur.EVM.33870-RA/Caur.EVM.05445-RA/Caur.EVM.36361-RA/Caur.EVM.19653-RA/Caur.EVM.22754-RA/Caur.EVM.38296-RA/Caur.EVM.08247-RA/Caur.EVM.24145-RA/Caur.EVM.38120-RA/Caur.EVM.03585-RA/Caur.EVM.36568-RA/Caur.EVM.11805-RA/Caur.EVM.09757-RA/Caur.EVM.14240-RA/Caur.EVM.00572-RA/Caur.EVM.09979-RA/Caur.EVM.38295-RA/Caur.EVM.15819-RA/Caur.EVM.02964-RA/Caur.EVM.11377-RA/Caur.EVM.22179-RA/Cau…	46
GO:0007498	BP	GO:0007498	mesoderm development	0.00785205	0.699718	0.690571	Caur.EVM.00956-RA/Caur.EVM.20226-RA/Caur.EVM.05657-RA/Caur.EVM.10111-RA/Caur.EVM.11899-RA/Caur.EVM.05187-RA/Caur.EVM.33890-RA/Caur.EVM.29275-RA/Caur.EVM.04461-RA/Caur.EVM.02581-RA/Caur.EVM.37837-RA/Caur.EVM.07496-RA/Caur.EVM.25992-RA/Caur.EVM.13327-RA/Caur.EVM.34113-RA/Caur.EVM.22498-RA/Caur.EVM.06565-RA/Caur.EVM.00270-RA/Caur.EVM.23394-RA/Caur.EVM.19767-RA/Caur.EVM.12612-RA/Caur.EVM.00886-RA/Cau…	173
GO:0007306	BP	GO:0007306	eggshell chorion assembly	0.00806166	0.699718	0.690571	Caur.EVM.10111-RA/Caur.EVM.34307-RA/Caur.EVM.13327-RA/Caur.EVM.37501-RA/Caur.EVM.12882-RA/Caur.EVM.25448-RA/Caur.EVM.37534-RA/Caur.EVM.14368-RA/Caur.EVM.04185-RA/Caur.EVM.36016-RA/Caur.EVM.28835-RA/Caur.EVM.06753-RA/Caur.EVM.03005-RA/Caur.EVM.09771-RA/Caur.EVM.05985-RA/Caur.EVM.20139-RA	16
GO:0014866	BP	GO:0014866	skeletal myofibril assembly	0.00806166	0.699718	0.690571	Caur.EVM.23426-RA/Caur.EVM.36964-RA/Caur.EVM.03610-RA/Caur.EVM.33703-RA/Caur.EVM.10070-RA/Caur.EVM.16786-RA/Caur.EVM.07637-RA/Caur.EVM.34355-RA/Caur.EVM.09856-RA/Caur.EVM.36139-RA/Caur.EVM.08948-RA/Caur.EVM.18445-RA/Caur.EVM.02690-RA/Caur.EVM.17863-RA/Caur.EVM.34649-RA/Caur.EVM.33554-RA	16
GO:0048527	BP	GO:0048527	lateral root development	0.00824606	0.699718	0.690571	Caur.EVM.12611-RA/Caur.EVM.33451-RA/Caur.EVM.29282-RA/Caur.EVM.10642-RA/Caur.EVM.29664-RA/Caur.EVM.06048-RA/Caur.EVM.06243-RA/Caur.EVM.02447-RA/Caur.EVM.14301-RA/Caur.EVM.03259-RA/Caur.EVM.02446-RA/Caur.EVM.02445-RA/Caur.EVM.02457-RA/Caur.EVM.23087-RA/Caur.EVM.04727-RA/Caur.EVM.07379-RA/Caur.EVM.23873-RA/Caur.EVM.34477-RA/Caur.EVM.31031-RA/Caur.EVM.25074-RA/Caur.EVM.14857-RA/Caur.EVM.05317-RA/Cau…	37
GO:0048528	BP	GO:0048528	post-embryonic root development	0.00824606	0.699718	0.690571	Caur.EVM.12611-RA/Caur.EVM.33451-RA/Caur.EVM.29282-RA/Caur.EVM.10642-RA/Caur.EVM.29664-RA/Caur.EVM.06048-RA/Caur.EVM.06243-RA/Caur.EVM.02447-RA/Caur.EVM.14301-RA/Caur.EVM.03259-RA/Caur.EVM.02446-RA/Caur.EVM.02445-RA/Caur.EVM.02457-RA/Caur.EVM.23087-RA/Caur.EVM.04727-RA/Caur.EVM.07379-RA/Caur.EVM.23873-RA/Caur.EVM.34477-RA/Caur.EVM.31031-RA/Caur.EVM.25074-RA/Caur.EVM.14857-RA/Caur.EVM.05317-RA/Cau…	37
GO:0090696	BP	GO:0090696	post-embryonic plant organ development	0.00824606	0.699718	0.690571	Caur.EVM.12611-RA/Caur.EVM.33451-RA/Caur.EVM.29282-RA/Caur.EVM.10642-RA/Caur.EVM.29664-RA/Caur.EVM.06048-RA/Caur.EVM.06243-RA/Caur.EVM.02447-RA/Caur.EVM.14301-RA/Caur.EVM.03259-RA/Caur.EVM.02446-RA/Caur.EVM.02445-RA/Caur.EVM.02457-RA/Caur.EVM.23087-RA/Caur.EVM.04727-RA/Caur.EVM.07379-RA/Caur.EVM.23873-RA/Caur.EVM.34477-RA/Caur.EVM.31031-RA/Caur.EVM.25074-RA/Caur.EVM.14857-RA/Caur.EVM.05317-RA/Cau…	37
GO:0030325	BP	GO:0030325	adrenal gland development	0.00872766	0.699718	0.690571	Caur.EVM.01167-RA/Caur.EVM.02581-RA/Caur.EVM.22498-RA/Caur.EVM.33564-RA/Caur.EVM.30304-RA/Caur.EVM.23098-RA/Caur.EVM.34437-RA/Caur.EVM.15994-RA/Caur.EVM.17531-RA/Caur.EVM.34485-RA/Caur.EVM.33956-RA/Caur.EVM.25356-RA/Caur.EVM.23097-RA/Caur.EVM.02290-RA/Caur.EVM.19783-RA/Caur.EVM.36107-RA/Caur.EVM.08348-RA/Caur.EVM.26361-RA	18
GO:0008584	BP	GO:0008584	male gonad development	0.00890952	0.699718	0.690571	Caur.EVM.19653-RA/Caur.EVM.30544-RA/Caur.EVM.02581-RA/Caur.EVM.22540-RA/Caur.EVM.22498-RA/Caur.EVM.11110-RA/Caur.EVM.23034-RA/Caur.EVM.11045-RA/Caur.EVM.33019-RA/Caur.EVM.07976-RA/Caur.EVM.17083-RA/Caur.EVM.15234-RA/Caur.EVM.17531-RA/Caur.EVM.39256-RA/Caur.EVM.11050-RA/Caur.EVM.15175-RA/Caur.EVM.03744-RA/Caur.EVM.17742-RA/Caur.EVM.14071-RA/Caur.EVM.25567-RA/Caur.EVM.38436-RA/Caur.EVM.15258-RA/Cau…	24
GO:0045580	BP	GO:0045580	regulation of T cell differentiation	0.00890952	0.699718	0.690571	Caur.EVM.20606-RA/Caur.EVM.05445-RA/Caur.EVM.19653-RA/Caur.EVM.38296-RA/Caur.EVM.24145-RA/Caur.EVM.38120-RA/Caur.EVM.36568-RA/Caur.EVM.11805-RA/Caur.EVM.00572-RA/Caur.EVM.38295-RA/Caur.EVM.15819-RA/Caur.EVM.22179-RA/Caur.EVM.04686-RA/Caur.EVM.25283-RA/Caur.EVM.29103-RA/Caur.EVM.16446-RA/Caur.EVM.14071-RA/Caur.EVM.24862-RA/Caur.EVM.01526-RA/Caur.EVM.03654-RA/Caur.EVM.32799-RA/Caur.EVM.23132-RA/Cau…	24
GO:0071688	BP	GO:0071688	striated muscle myosin thick filament assembly	0.00890952	0.699718	0.690571	Caur.EVM.23426-RA/Caur.EVM.13296-RA/Caur.EVM.11561-RA/Caur.EVM.04928-RA/Caur.EVM.03610-RA/Caur.EVM.33703-RA/Caur.EVM.10087-RA/Caur.EVM.36693-RA/Caur.EVM.18685-RA/Caur.EVM.21065-RA/Caur.EVM.34048-RA/Caur.EVM.16786-RA/Caur.EVM.11153-RA/Caur.EVM.34355-RA/Caur.EVM.14336-RA/Caur.EVM.07395-RA/Caur.EVM.30944-RA/Caur.EVM.08948-RA/Caur.EVM.33228-RA/Caur.EVM.29060-RA/Caur.EVM.18445-RA/Caur.EVM.29061-RA/Cau…	24
GO:0003170	BP	GO:0003170	heart valve development	0.00905893	0.699718	0.690571	Caur.EVM.10111-RA/Caur.EVM.36361-RA/Caur.EVM.13327-RA/Caur.EVM.11020-RA/Caur.EVM.36338-RA/Caur.EVM.00245-RA/Caur.EVM.33703-RA/Caur.EVM.27117-RA/Caur.EVM.32869-RA/Caur.EVM.15209-RA/Caur.EVM.11078-RA/Caur.EVM.34355-RA/Caur.EVM.01882-RA/Caur.EVM.05257-RA/Caur.EVM.31738-RA/Caur.EVM.31936-RA/Caur.EVM.38361-RA/Caur.EVM.20038-RA/Caur.EVM.19579-RA/Caur.EVM.08656-RA/Caur.EVM.04740-RA/Caur.EVM.13144-RA	22
GO:0045765	BP	GO:0045765	regulation of angiogenesis	0.00994025	0.699718	0.690571	Caur.EVM.36361-RA/Caur.EVM.06565-RA/Caur.EVM.24395-RA/Caur.EVM.29310-RA/Caur.EVM.36979-RA/Caur.EVM.08176-RA/Caur.EVM.27475-RA/Caur.EVM.07350-RA/Caur.EVM.27249-RA/Caur.EVM.23276-RA/Caur.EVM.11856-RA/Caur.EVM.20206-RA/Caur.EVM.18694-RA/Caur.EVM.09640-RA/Caur.EVM.28763-RA/Caur.EVM.21860-RA/Caur.EVM.07685-RA/Caur.EVM.30278-RA/Caur.EVM.23770-RA/Caur.EVM.24992-RA/Caur.EVM.34007-RA/Caur.EVM.11577-RA/Cau…	61
GO:0061008	BP	GO:0061008	hepaticobiliary system development	0.00999902	0.699718	0.690571	Caur.EVM.36862-RA/Caur.EVM.33870-RA/Caur.EVM.10111-RA/Caur.EVM.09823-RA/Caur.EVM.32547-RA/Caur.EVM.08217-RA/Caur.EVM.01844-RA/Caur.EVM.36863-RA/Caur.EVM.32548-RA/Caur.EVM.26388-RA/Caur.EVM.19653-RA/Caur.EVM.08597-RA/Caur.EVM.17438-RA/Caur.EVM.02581-RA/Caur.EVM.22754-RA/Caur.EVM.21729-RA/Caur.EVM.13327-RA/Caur.EVM.22498-RA/Caur.EVM.34176-RA/Caur.EVM.26738-RA/Caur.EVM.02913-RA/Caur.EVM.24719-RA/Cau…	108
GO:0022622	BP	GO:0022622	root system development	0.0101879	0.699718	0.690571	Caur.EVM.12611-RA/Caur.EVM.33451-RA/Caur.EVM.29282-RA/Caur.EVM.10642-RA/Caur.EVM.29664-RA/Caur.EVM.06048-RA/Caur.EVM.06243-RA/Caur.EVM.02447-RA/Caur.EVM.14301-RA/Caur.EVM.03259-RA/Caur.EVM.02446-RA/Caur.EVM.35095-RA/Caur.EVM.02445-RA/Caur.EVM.02457-RA/Caur.EVM.23087-RA/Caur.EVM.04727-RA/Caur.EVM.07379-RA/Caur.EVM.23873-RA/Caur.EVM.34477-RA/Caur.EVM.31031-RA/Caur.EVM.25074-RA/Caur.EVM.14857-RA/Cau…	38
GO:0048364	BP	GO:0048364	root development	0.0101879	0.699718	0.690571	Caur.EVM.12611-RA/Caur.EVM.33451-RA/Caur.EVM.29282-RA/Caur.EVM.10642-RA/Caur.EVM.29664-RA/Caur.EVM.06048-RA/Caur.EVM.06243-RA/Caur.EVM.02447-RA/Caur.EVM.14301-RA/Caur.EVM.03259-RA/Caur.EVM.02446-RA/Caur.EVM.35095-RA/Caur.EVM.02445-RA/Caur.EVM.02457-RA/Caur.EVM.23087-RA/Caur.EVM.04727-RA/Caur.EVM.07379-RA/Caur.EVM.23873-RA/Caur.EVM.34477-RA/Caur.EVM.31031-RA/Caur.EVM.25074-RA/Caur.EVM.14857-RA/Cau…	38
GO:0060828	BP	GO:0060828	regulation of canonical Wnt signaling pathway	0.0102751	0.699718	0.690571	Caur.EVM.00956-RA/Caur.EVM.08217-RA/Caur.EVM.31909-RA/Caur.EVM.35270-RA/Caur.EVM.08459-RA/Caur.EVM.38532-RA/Caur.EVM.37937-RA/Caur.EVM.31233-RA/Caur.EVM.12612-RA/Caur.EVM.11044-RA/Caur.EVM.12523-RA/Caur.EVM.27667-RA/Caur.EVM.18109-RA/Caur.EVM.02494-RA/Caur.EVM.21682-RA/Caur.EVM.34631-RA/Caur.EVM.21776-RA/Caur.EVM.03451-RA/Caur.EVM.15297-RA/Caur.EVM.27887-RA/Caur.EVM.27082-RA/Caur.EVM.36020-RA/Cau…	64
GO:0030217	BP	GO:0030217	T cell differentiation	0.0105544	0.699718	0.690571	Caur.EVM.20606-RA/Caur.EVM.05445-RA/Caur.EVM.08217-RA/Caur.EVM.19653-RA/Caur.EVM.38296-RA/Caur.EVM.03649-RA/Caur.EVM.31233-RA/Caur.EVM.30559-RA/Caur.EVM.33019-RA/Caur.EVM.24145-RA/Caur.EVM.38120-RA/Caur.EVM.36568-RA/Caur.EVM.11805-RA/Caur.EVM.34714-RA/Caur.EVM.17264-RA/Caur.EVM.00572-RA/Caur.EVM.21878-RA/Caur.EVM.38295-RA/Caur.EVM.15819-RA/Caur.EVM.23664-RA/Caur.EVM.01504-RA/Caur.EVM.22179-RA/Cau…	67
GO:0060485	BP	GO:0060485	mesenchyme development	0.0110317	0.699718	0.690571	Caur.EVM.33870-RA/Caur.EVM.20226-RA/Caur.EVM.10111-RA/Caur.EVM.17389-RA/Caur.EVM.02581-RA/Caur.EVM.22754-RA/Caur.EVM.07496-RA/Caur.EVM.25992-RA/Caur.EVM.10528-RA/Caur.EVM.13327-RA/Caur.EVM.22498-RA/Caur.EVM.06565-RA/Caur.EVM.11020-RA/Caur.EVM.00886-RA/Caur.EVM.21712-RA/Caur.EVM.36338-RA/Caur.EVM.30304-RA/Caur.EVM.29310-RA/Caur.EVM.23098-RA/Caur.EVM.16205-RA/Caur.EVM.19290-RA/Caur.EVM.10205-RA/Cau…	186
GO:0003318	BP	GO:0003318	cell migration to the midline involved in heart development	0.0110643	0.699718	0.690571	Caur.EVM.26738-RA/Caur.EVM.11020-RA/Caur.EVM.36338-RA/Caur.EVM.30091-RA/Caur.EVM.38286-RA/Caur.EVM.14387-RA/Caur.EVM.30251-RA/Caur.EVM.34474-RA/Caur.EVM.19001-RA/Caur.EVM.16794-RA/Caur.EVM.05848-RA/Caur.EVM.09118-RA/Caur.EVM.10650-RA	13
GO:0007016	BP	GO:0007016	cytoskeletal anchoring at plasma membrane	0.0110643	0.699718	0.690571	Caur.EVM.33870-RA/Caur.EVM.15367-RA/Caur.EVM.22754-RA/Caur.EVM.24474-RA/Caur.EVM.16046-RA/Caur.EVM.21065-RA/Caur.EVM.32869-RA/Caur.EVM.10135-RA/Caur.EVM.20813-RA/Caur.EVM.27983-RA/Caur.EVM.05257-RA/Caur.EVM.05877-RA/Caur.EVM.13304-RA	13
GO:0031327	BP	GO:0031327	negative regulation of cellular biosynthetic process	0.0111018	0.699718	0.690571	Caur.EVM.00790-RA/Caur.EVM.33870-RA/Caur.EVM.10111-RA/Caur.EVM.36361-RA/Caur.EVM.06479-RA/Caur.EVM.30598-RA/Caur.EVM.05474-RA/Caur.EVM.19653-RA/Caur.EVM.08597-RA/Caur.EVM.02045-RA/Caur.EVM.30544-RA/Caur.EVM.34307-RA/Caur.EVM.02581-RA/Caur.EVM.11043-RA/Caur.EVM.22754-RA/Caur.EVM.26873-RA/Caur.EVM.13327-RA/Caur.EVM.26955-RA/Caur.EVM.22540-RA/Caur.EVM.22498-RA/Caur.EVM.27741-RA/Caur.EVM.24709-RA/Cau…	300
GO:0003012	BP	GO:0003012	muscle system process	0.0112763	0.699718	0.690571	Caur.EVM.38296-RA/Caur.EVM.37501-RA/Caur.EVM.32164-RA/Caur.EVM.00564-RA/Caur.EVM.05723-RA/Caur.EVM.31537-RA/Caur.EVM.14597-RA/Caur.EVM.08505-RA/Caur.EVM.03857-RA/Caur.EVM.33713-RA/Caur.EVM.23807-RA/Caur.EVM.13589-RA/Caur.EVM.34735-RA/Caur.EVM.15340-RA/Caur.EVM.39018-RA/Caur.EVM.00531-RA/Caur.EVM.33703-RA/Caur.EVM.38295-RA/Caur.EVM.08680-RA/Caur.EVM.37388-RA/Caur.EVM.20791-RA/Caur.EVM.07685-RA/Cau…	82
GO:0060284	BP	GO:0060284	regulation of cell development	0.0112808	0.699718	0.690571	Caur.EVM.18321-RA/Caur.EVM.10111-RA/Caur.EVM.37453-RA/Caur.EVM.19653-RA/Caur.EVM.09429-RA/Caur.EVM.34451-RA/Caur.EVM.07496-RA/Caur.EVM.13327-RA/Caur.EVM.37937-RA/Caur.EVM.06565-RA/Caur.EVM.11833-RA/Caur.EVM.19518-RA/Caur.EVM.16778-RA/Caur.EVM.19767-RA/Caur.EVM.12143-RA/Caur.EVM.21309-RA/Caur.EVM.27892-RA/Caur.EVM.00056-RA/Caur.EVM.29310-RA/Caur.EVM.38245-RA/Caur.EVM.23034-RA/Caur.EVM.30559-RA/Cau…	289
GO:0043393	BP	GO:0043393	regulation of protein binding	0.0115701	0.699718	0.690571	Caur.EVM.00790-RA/Caur.EVM.30114-RA/Caur.EVM.08247-RA/Caur.EVM.14975-RA/Caur.EVM.20386-RA/Caur.EVM.38367-RA/Caur.EVM.19677-RA/Caur.EVM.37443-RA/Caur.EVM.33703-RA/Caur.EVM.30195-RA/Caur.EVM.34048-RA/Caur.EVM.12292-RA/Caur.EVM.23823-RA/Caur.EVM.20828-RA/Caur.EVM.06188-RA/Caur.EVM.34355-RA/Caur.EVM.27122-RA/Caur.EVM.24159-RA/Caur.EVM.14269-RA/Caur.EVM.01989-RA/Caur.EVM.16810-RA/Caur.EVM.17742-RA/Cau…	27
GO:0001889	BP	GO:0001889	liver development	0.0118624	0.699718	0.690571	Caur.EVM.36862-RA/Caur.EVM.33870-RA/Caur.EVM.10111-RA/Caur.EVM.09823-RA/Caur.EVM.32547-RA/Caur.EVM.08217-RA/Caur.EVM.01844-RA/Caur.EVM.36863-RA/Caur.EVM.32548-RA/Caur.EVM.26388-RA/Caur.EVM.19653-RA/Caur.EVM.08597-RA/Caur.EVM.17438-RA/Caur.EVM.02581-RA/Caur.EVM.22754-RA/Caur.EVM.21729-RA/Caur.EVM.13327-RA/Caur.EVM.22498-RA/Caur.EVM.34176-RA/Caur.EVM.26738-RA/Caur.EVM.02913-RA/Caur.EVM.24719-RA/Cau…	107
GO:1903706	BP	GO:1903706	regulation of hemopoiesis	0.0120671	0.699718	0.690571	Caur.EVM.20606-RA/Caur.EVM.33870-RA/Caur.EVM.05445-RA/Caur.EVM.36361-RA/Caur.EVM.19653-RA/Caur.EVM.22754-RA/Caur.EVM.38296-RA/Caur.EVM.00857-RA/Caur.EVM.33459-RA/Caur.EVM.08247-RA/Caur.EVM.33019-RA/Caur.EVM.36979-RA/Caur.EVM.24145-RA/Caur.EVM.38120-RA/Caur.EVM.03585-RA/Caur.EVM.36568-RA/Caur.EVM.11805-RA/Caur.EVM.09757-RA/Caur.EVM.14240-RA/Caur.EVM.30986-RA/Caur.EVM.00572-RA/Caur.EVM.09979-RA/Cau…	71
GO:0031033	BP	GO:0031033	myosin filament organization	0.0121924	0.699718	0.690571	Caur.EVM.23426-RA/Caur.EVM.13296-RA/Caur.EVM.11561-RA/Caur.EVM.04928-RA/Caur.EVM.03610-RA/Caur.EVM.33703-RA/Caur.EVM.10087-RA/Caur.EVM.36693-RA/Caur.EVM.18685-RA/Caur.EVM.21065-RA/Caur.EVM.34048-RA/Caur.EVM.16786-RA/Caur.EVM.11153-RA/Caur.EVM.34355-RA/Caur.EVM.23474-RA/Caur.EVM.14336-RA/Caur.EVM.07395-RA/Caur.EVM.30944-RA/Caur.EVM.08948-RA/Caur.EVM.33228-RA/Caur.EVM.29060-RA/Caur.EVM.18445-RA/Cau…	25
GO:0031034	BP	GO:0031034	myosin filament assembly	0.0121924	0.699718	0.690571	Caur.EVM.23426-RA/Caur.EVM.13296-RA/Caur.EVM.11561-RA/Caur.EVM.04928-RA/Caur.EVM.03610-RA/Caur.EVM.33703-RA/Caur.EVM.10087-RA/Caur.EVM.36693-RA/Caur.EVM.18685-RA/Caur.EVM.21065-RA/Caur.EVM.34048-RA/Caur.EVM.16786-RA/Caur.EVM.11153-RA/Caur.EVM.34355-RA/Caur.EVM.23474-RA/Caur.EVM.14336-RA/Caur.EVM.07395-RA/Caur.EVM.30944-RA/Caur.EVM.08948-RA/Caur.EVM.33228-RA/Caur.EVM.29060-RA/Caur.EVM.18445-RA/Cau…	25
GO:0048570	BP	GO:0048570	notochord morphogenesis	0.0121924	0.699718	0.690571	Caur.EVM.06565-RA/Caur.EVM.29310-RA/Caur.EVM.30386-RA/Caur.EVM.12834-RA/Caur.EVM.25806-RA/Caur.EVM.14230-RA/Caur.EVM.17862-RA/Caur.EVM.09317-RA/Caur.EVM.33249-RA/Caur.EVM.00345-RA/Caur.EVM.08742-RA/Caur.EVM.30683-RA/Caur.EVM.25283-RA/Caur.EVM.24034-RA/Caur.EVM.14894-RA/Caur.EVM.16445-RA/Caur.EVM.01989-RA/Caur.EVM.36107-RA/Caur.EVM.08348-RA/Caur.EVM.21251-RA/Caur.EVM.10072-RA/Caur.EVM.00451-RA/Cau…	25
GO:0098662	BP	GO:0098662	inorganic cation transmembrane transport	0.0122563	0.699718	0.690571	Caur.EVM.35230-RA/Caur.EVM.19575-RA/Caur.EVM.19925-RA/Caur.EVM.15528-RA/Caur.EVM.34322-RA/Caur.EVM.04463-RA/Caur.EVM.38821-RA/Caur.EVM.21117-RA/Caur.EVM.24335-RA/Caur.EVM.11447-RA/Caur.EVM.17192-RA/Caur.EVM.14898-RA/Caur.EVM.16220-RA/Caur.EVM.02968-RA/Caur.EVM.14597-RA/Caur.EVM.13245-RA/Caur.EVM.13296-RA/Caur.EVM.28075-RA/Caur.EVM.11332-RA/Caur.EVM.25400-RA/Caur.EVM.01549-RA/Caur.EVM.32638-RA/Cau…	181
GO:0055024	BP	GO:0055024	regulation of cardiac muscle tissue development	0.0124828	0.699718	0.690571	Caur.EVM.10111-RA/Caur.EVM.13327-RA/Caur.EVM.02494-RA/Caur.EVM.34161-RA/Caur.EVM.33703-RA/Caur.EVM.18123-RA/Caur.EVM.30195-RA/Caur.EVM.24133-RA/Caur.EVM.13141-RA/Caur.EVM.34355-RA/Caur.EVM.04744-RA/Caur.EVM.01989-RA/Caur.EVM.09212-RA/Caur.EVM.04627-RA/Caur.EVM.05147-RA	15
GO:0060974	BP	GO:0060974	cell migration involved in heart formation	0.0124828	0.699718	0.690571	Caur.EVM.26738-RA/Caur.EVM.11020-RA/Caur.EVM.36338-RA/Caur.EVM.30091-RA/Caur.EVM.38286-RA/Caur.EVM.13245-RA/Caur.EVM.14387-RA/Caur.EVM.30251-RA/Caur.EVM.18043-RA/Caur.EVM.34474-RA/Caur.EVM.19001-RA/Caur.EVM.16794-RA/Caur.EVM.05848-RA/Caur.EVM.09118-RA/Caur.EVM.10650-RA	15
GO:0043068	BP	GO:0043068	positive regulation of programmed cell death	0.0128962	0.699718	0.690571	Caur.EVM.10111-RA/Caur.EVM.30598-RA/Caur.EVM.30544-RA/Caur.EVM.27603-RA/Caur.EVM.11043-RA/Caur.EVM.07496-RA/Caur.EVM.33606-RA/Caur.EVM.38517-RA/Caur.EVM.13327-RA/Caur.EVM.22540-RA/Caur.EVM.11833-RA/Caur.EVM.24395-RA/Caur.EVM.04013-RA/Caur.EVM.15566-RA/Caur.EVM.10995-RA/Caur.EVM.36113-RA/Caur.EVM.30114-RA/Caur.EVM.14239-RA/Caur.EVM.04675-RA/Caur.EVM.23490-RA/Caur.EVM.07776-RA/Caur.EVM.30559-RA/Cau…	168
GO:0061318	BP	GO:0061318	renal filtration cell differentiation	0.0131331	0.699718	0.690571	Caur.EVM.10111-RA/Caur.EVM.01167-RA/Caur.EVM.13327-RA/Caur.EVM.16241-RA/Caur.EVM.33564-RA/Caur.EVM.30304-RA/Caur.EVM.21563-RA/Caur.EVM.02951-RA/Caur.EVM.34485-RA/Caur.EVM.06715-RA/Caur.EVM.01955-RA/Caur.EVM.33956-RA/Caur.EVM.20095-RA/Caur.EVM.35950-RA/Caur.EVM.22845-RA/Caur.EVM.02290-RA/Caur.EVM.19783-RA/Caur.EVM.02070-RA/Caur.EVM.26361-RA/Caur.EVM.34649-RA/Caur.EVM.08656-RA	21
GO:0010522	BP	GO:0010522	regulation of calcium ion transport into cytosol	0.0131525	0.699718	0.690571	Caur.EVM.17192-RA/Caur.EVM.14597-RA/Caur.EVM.15739-RA/Caur.EVM.13589-RA/Caur.EVM.15340-RA/Caur.EVM.08680-RA/Caur.EVM.14849-RA/Caur.EVM.10135-RA/Caur.EVM.34853-RA/Caur.EVM.33407-RA/Caur.EVM.37775-RA/Caur.EVM.14880-RA/Caur.EVM.25096-RA/Caur.EVM.27868-RA/Caur.EVM.07153-RA/Caur.EVM.09638-RA/Caur.EVM.13304-RA	17
GO:0030501	BP	GO:0030501	positive regulation of bone mineralization	0.0131525	0.699718	0.690571	Caur.EVM.10111-RA/Caur.EVM.34451-RA/Caur.EVM.13327-RA/Caur.EVM.30386-RA/Caur.EVM.02865-RA/Caur.EVM.14230-RA/Caur.EVM.05194-RA/Caur.EVM.33703-RA/Caur.EVM.35656-RA/Caur.EVM.27096-RA/Caur.EVM.34853-RA/Caur.EVM.34355-RA/Caur.EVM.01088-RA/Caur.EVM.38342-RA/Caur.EVM.08668-RA/Caur.EVM.34151-RA/Caur.EVM.10627-RA	17
GO:0060972	BP	GO:0060972	left/right pattern formation	0.0131525	0.699718	0.690571	Caur.EVM.35230-RA/Caur.EVM.02581-RA/Caur.EVM.22498-RA/Caur.EVM.02865-RA/Caur.EVM.30251-RA/Caur.EVM.11805-RA/Caur.EVM.08742-RA/Caur.EVM.15819-RA/Caur.EVM.00049-RA/Caur.EVM.23823-RA/Caur.EVM.06188-RA/Caur.EVM.16445-RA/Caur.EVM.11499-RA/Caur.EVM.03654-RA/Caur.EVM.10650-RA/Caur.EVM.12711-RA/Caur.EVM.08656-RA	17
GO:0070169	BP	GO:0070169	positive regulation of biomineral tissue development	0.0131525	0.699718	0.690571	Caur.EVM.10111-RA/Caur.EVM.34451-RA/Caur.EVM.13327-RA/Caur.EVM.30386-RA/Caur.EVM.02865-RA/Caur.EVM.14230-RA/Caur.EVM.05194-RA/Caur.EVM.33703-RA/Caur.EVM.35656-RA/Caur.EVM.27096-RA/Caur.EVM.34853-RA/Caur.EVM.34355-RA/Caur.EVM.01088-RA/Caur.EVM.38342-RA/Caur.EVM.08668-RA/Caur.EVM.34151-RA/Caur.EVM.10627-RA	17
GO:0045669	BP	GO:0045669	positive regulation of osteoblast differentiation	0.0133126	0.699718	0.690571	Caur.EVM.33870-RA/Caur.EVM.10111-RA/Caur.EVM.22754-RA/Caur.EVM.34451-RA/Caur.EVM.13327-RA/Caur.EVM.30386-RA/Caur.EVM.02865-RA/Caur.EVM.14230-RA/Caur.EVM.05194-RA/Caur.EVM.33703-RA/Caur.EVM.35656-RA/Caur.EVM.10120-RA/Caur.EVM.27096-RA/Caur.EVM.34355-RA/Caur.EVM.26140-RA/Caur.EVM.38342-RA/Caur.EVM.05147-RA/Caur.EVM.13315-RA/Caur.EVM.10627-RA	19
GO:0032835	BP	GO:0032835	glomerulus development	0.0135374	0.699718	0.690571	Caur.EVM.01167-RA/Caur.EVM.16241-RA/Caur.EVM.33564-RA/Caur.EVM.30304-RA/Caur.EVM.08176-RA/Caur.EVM.27475-RA/Caur.EVM.21563-RA/Caur.EVM.02951-RA/Caur.EVM.28277-RA/Caur.EVM.11856-RA/Caur.EVM.33703-RA/Caur.EVM.34485-RA/Caur.EVM.06715-RA/Caur.EVM.20272-RA/Caur.EVM.03862-RA/Caur.EVM.01955-RA/Caur.EVM.27096-RA/Caur.EVM.33956-RA/Caur.EVM.07735-RA/Caur.EVM.20095-RA/Caur.EVM.37015-RA/Caur.EVM.25283-RA/Cau…	42
GO:0098655	BP	GO:0098655	cation transmembrane transport	0.0142872	0.699718	0.690571	Caur.EVM.35230-RA/Caur.EVM.19575-RA/Caur.EVM.19925-RA/Caur.EVM.15528-RA/Caur.EVM.34322-RA/Caur.EVM.04463-RA/Caur.EVM.38821-RA/Caur.EVM.21117-RA/Caur.EVM.24335-RA/Caur.EVM.11447-RA/Caur.EVM.17192-RA/Caur.EVM.14898-RA/Caur.EVM.16220-RA/Caur.EVM.02968-RA/Caur.EVM.14597-RA/Caur.EVM.13245-RA/Caur.EVM.13296-RA/Caur.EVM.28075-RA/Caur.EVM.11332-RA/Caur.EVM.25400-RA/Caur.EVM.01549-RA/Caur.EVM.32638-RA/Cau…	184
GO:0014028	BP	GO:0014028	notochord formation	0.0143844	0.699718	0.690571	Caur.EVM.06565-RA/Caur.EVM.29310-RA/Caur.EVM.12834-RA/Caur.EVM.33249-RA/Caur.EVM.08742-RA/Caur.EVM.16445-RA/Caur.EVM.36107-RA/Caur.EVM.08348-RA/Caur.EVM.21251-RA/Caur.EVM.09058-RA	10
GO:0031060	BP	GO:0031060	regulation of histone methylation	0.0143844	0.699718	0.690571	Caur.EVM.08597-RA/Caur.EVM.30244-RA/Caur.EVM.10659-RA/Caur.EVM.33459-RA/Caur.EVM.35416-RA/Caur.EVM.19290-RA/Caur.EVM.27570-RA/Caur.EVM.03585-RA/Caur.EVM.13768-RA/Caur.EVM.06720-RA	10
GO:0007584	BP	GO:0007584	response to nutrient	0.0143905	0.699718	0.690571	Caur.EVM.06479-RA/Caur.EVM.19653-RA/Caur.EVM.13816-RA/Caur.EVM.11833-RA/Caur.EVM.24059-RA/Caur.EVM.12768-RA/Caur.EVM.36979-RA/Caur.EVM.14597-RA/Caur.EVM.03585-RA/Caur.EVM.01654-RA/Caur.EVM.15739-RA/Caur.EVM.15340-RA/Caur.EVM.28086-RA/Caur.EVM.33703-RA/Caur.EVM.37388-RA/Caur.EVM.10945-RA/Caur.EVM.13672-RA/Caur.EVM.11254-RA/Caur.EVM.23770-RA/Caur.EVM.33717-RA/Caur.EVM.21254-RA/Caur.EVM.03800-RA/Cau…	64
GO:0006665	BP	GO:0006665	sphingolipid metabolic process	0.0147178	0.699718	0.690571	Caur.EVM.07496-RA/Caur.EVM.20855-RA/Caur.EVM.36113-RA/Caur.EVM.17070-RA/Caur.EVM.29894-RA/Caur.EVM.22276-RA/Caur.EVM.38974-RA/Caur.EVM.05380-RA/Caur.EVM.30531-RA/Caur.EVM.19300-RA/Caur.EVM.17547-RA/Caur.EVM.14743-RA/Caur.EVM.11553-RA/Caur.EVM.13617-RA/Caur.EVM.21423-RA/Caur.EVM.28247-RA/Caur.EVM.24731-RA/Caur.EVM.11575-RA/Caur.EVM.24212-RA/Caur.EVM.15893-RA/Caur.EVM.18696-RA/Caur.EVM.31140-RA/Cau…	35
GO:0010771	BP	GO:0010771	negative regulation of cell morphogenesis involved in differentiation	0.0147178	0.699718	0.690571	Caur.EVM.37453-RA/Caur.EVM.07496-RA/Caur.EVM.06565-RA/Caur.EVM.11833-RA/Caur.EVM.29310-RA/Caur.EVM.10205-RA/Caur.EVM.36979-RA/Caur.EVM.00179-RA/Caur.EVM.25400-RA/Caur.EVM.05380-RA/Caur.EVM.11553-RA/Caur.EVM.35843-RA/Caur.EVM.20386-RA/Caur.EVM.07302-RA/Caur.EVM.37352-RA/Caur.EVM.30195-RA/Caur.EVM.10978-RA/Caur.EVM.11597-RA/Caur.EVM.19002-RA/Caur.EVM.15846-RA/Caur.EVM.21271-RA/Caur.EVM.17742-RA/Cau…	35
GO:0001570	BP	GO:0001570	vasculogenesis	0.0147993	0.699718	0.690571	Caur.EVM.33870-RA/Caur.EVM.20226-RA/Caur.EVM.02581-RA/Caur.EVM.22754-RA/Caur.EVM.25992-RA/Caur.EVM.22498-RA/Caur.EVM.06565-RA/Caur.EVM.17945-RA/Caur.EVM.19788-RA/Caur.EVM.17220-RA/Caur.EVM.30304-RA/Caur.EVM.14092-RA/Caur.EVM.29310-RA/Caur.EVM.14762-RA/Caur.EVM.18137-RA/Caur.EVM.08176-RA/Caur.EVM.05069-RA/Caur.EVM.16485-RA/Caur.EVM.02529-RA/Caur.EVM.24636-RA/Caur.EVM.31985-RA/Caur.EVM.07123-RA/Cau…	70
GO:0035108	BP	GO:0035108	limb morphogenesis	0.0147993	0.699718	0.690571	Caur.EVM.33870-RA/Caur.EVM.17389-RA/Caur.EVM.03732-RA/Caur.EVM.22754-RA/Caur.EVM.34451-RA/Caur.EVM.24536-RA/Caur.EVM.19767-RA/Caur.EVM.02865-RA/Caur.EVM.29335-RA/Caur.EVM.30408-RA/Caur.EVM.05077-RA/Caur.EVM.35562-RA/Caur.EVM.04378-RA/Caur.EVM.10087-RA/Caur.EVM.20624-RA/Caur.EVM.04724-RA/Caur.EVM.36547-RA/Caur.EVM.15760-RA/Caur.EVM.31556-RA/Caur.EVM.36693-RA/Caur.EVM.00049-RA/Caur.EVM.01852-RA/Cau…	70
GO:1903708	BP	GO:1903708	positive regulation of hemopoiesis	0.0149919	0.700284	0.691129	Caur.EVM.20606-RA/Caur.EVM.05445-RA/Caur.EVM.36361-RA/Caur.EVM.19653-RA/Caur.EVM.38296-RA/Caur.EVM.36979-RA/Caur.EVM.38120-RA/Caur.EVM.03585-RA/Caur.EVM.14240-RA/Caur.EVM.38295-RA/Caur.EVM.28763-RA/Caur.EVM.15110-RA/Caur.EVM.37870-RA/Caur.EVM.29561-RA/Caur.EVM.07669-RA/Caur.EVM.04686-RA/Caur.EVM.25283-RA/Caur.EVM.29103-RA/Caur.EVM.18038-RA/Caur.EVM.16446-RA/Caur.EVM.14071-RA/Caur.EVM.32799-RA/Cau…	28
GO:0042246	BP	GO:0042246	tissue regeneration	0.0159387	0.710207	0.700923	Caur.EVM.01737-RA/Caur.EVM.05657-RA/Caur.EVM.11899-RA/Caur.EVM.05187-RA/Caur.EVM.03732-RA/Caur.EVM.21576-RA/Caur.EVM.36707-RA/Caur.EVM.13816-RA/Caur.EVM.28678-RA/Caur.EVM.28318-RA/Caur.EVM.24059-RA/Caur.EVM.29925-RA/Caur.EVM.12612-RA/Caur.EVM.00886-RA/Caur.EVM.29847-RA/Caur.EVM.39134-RA/Caur.EVM.13679-RA/Caur.EVM.35614-RA/Caur.EVM.34166-RA/Caur.EVM.02865-RA/Caur.EVM.21776-RA/Caur.EVM.27171-RA/Cau…	95
GO:0030199	BP	GO:0030199	collagen fibril organization	0.0162459	0.710207	0.700923	Caur.EVM.20226-RA/Caur.EVM.03732-RA/Caur.EVM.25992-RA/Caur.EVM.31360-RA/Caur.EVM.30304-RA/Caur.EVM.29335-RA/Caur.EVM.36351-RA/Caur.EVM.32036-RA/Caur.EVM.04378-RA/Caur.EVM.31181-RA/Caur.EVM.34485-RA/Caur.EVM.32506-RA/Caur.EVM.05709-RA/Caur.EVM.01702-RA/Caur.EVM.00189-RA/Caur.EVM.08690-RA/Caur.EVM.23823-RA/Caur.EVM.13141-RA/Caur.EVM.15058-RA/Caur.EVM.06188-RA/Caur.EVM.04714-RA/Caur.EVM.30144-RA/Cau…	38
GO:0051924	BP	GO:0051924	regulation of calcium ion transport	0.0162459	0.710207	0.700923	Caur.EVM.06479-RA/Caur.EVM.34322-RA/Caur.EVM.17192-RA/Caur.EVM.31537-RA/Caur.EVM.14898-RA/Caur.EVM.14597-RA/Caur.EVM.32638-RA/Caur.EVM.16619-RA/Caur.EVM.21030-RA/Caur.EVM.15739-RA/Caur.EVM.13589-RA/Caur.EVM.15340-RA/Caur.EVM.39018-RA/Caur.EVM.28086-RA/Caur.EVM.08680-RA/Caur.EVM.01785-RA/Caur.EVM.20791-RA/Caur.EVM.12078-RA/Caur.EVM.23770-RA/Caur.EVM.14849-RA/Caur.EVM.00327-RA/Caur.EVM.10135-RA/Cau…	38
GO:0099402	BP	GO:0099402	plant organ development	0.0162459	0.710207	0.700923	Caur.EVM.12611-RA/Caur.EVM.33451-RA/Caur.EVM.29282-RA/Caur.EVM.10642-RA/Caur.EVM.29664-RA/Caur.EVM.06048-RA/Caur.EVM.06243-RA/Caur.EVM.02447-RA/Caur.EVM.14301-RA/Caur.EVM.03259-RA/Caur.EVM.02446-RA/Caur.EVM.35095-RA/Caur.EVM.02445-RA/Caur.EVM.02457-RA/Caur.EVM.23087-RA/Caur.EVM.04727-RA/Caur.EVM.07379-RA/Caur.EVM.23873-RA/Caur.EVM.34477-RA/Caur.EVM.31031-RA/Caur.EVM.25074-RA/Caur.EVM.14857-RA/Cau…	38
GO:0035162	BP	GO:0035162	embryonic hemopoiesis	0.016491	0.710207	0.700923	Caur.EVM.10111-RA/Caur.EVM.36361-RA/Caur.EVM.23476-RA/Caur.EVM.13327-RA/Caur.EVM.04463-RA/Caur.EVM.00270-RA/Caur.EVM.00223-RA/Caur.EVM.14092-RA/Caur.EVM.02843-RA/Caur.EVM.16205-RA/Caur.EVM.34237-RA/Caur.EVM.11332-RA/Caur.EVM.02865-RA/Caur.EVM.31852-RA/Caur.EVM.23741-RA/Caur.EVM.30083-RA/Caur.EVM.36823-RA/Caur.EVM.34762-RA/Caur.EVM.36016-RA/Caur.EVM.38148-RA/Caur.EVM.34614-RA/Caur.EVM.36983-RA/Cau…	74
GO:0001655	BP	GO:0001655	urogenital system development	0.016821	0.710207	0.700923	Caur.EVM.33870-RA/Caur.EVM.20226-RA/Caur.EVM.10111-RA/Caur.EVM.36361-RA/Caur.EVM.17389-RA/Caur.EVM.01167-RA/Caur.EVM.19653-RA/Caur.EVM.22754-RA/Caur.EVM.34451-RA/Caur.EVM.25992-RA/Caur.EVM.02978-RA/Caur.EVM.13327-RA/Caur.EVM.16241-RA/Caur.EVM.03649-RA/Caur.EVM.13816-RA/Caur.EVM.11833-RA/Caur.EVM.33564-RA/Caur.EVM.00886-RA/Caur.EVM.14410-RA/Caur.EVM.00056-RA/Caur.EVM.21302-RA/Caur.EVM.30304-RA/Cau…	166
GO:0001945	BP	GO:0001945	lymph vessel development	0.0174142	0.710207	0.700923	Caur.EVM.20226-RA/Caur.EVM.09321-RA/Caur.EVM.24029-RA/Caur.EVM.25992-RA/Caur.EVM.09016-RA/Caur.EVM.19788-RA/Caur.EVM.29925-RA/Caur.EVM.30304-RA/Caur.EVM.30386-RA/Caur.EVM.14230-RA/Caur.EVM.18721-RA/Caur.EVM.18694-RA/Caur.EVM.34485-RA/Caur.EVM.30278-RA/Caur.EVM.23558-RA/Caur.EVM.11577-RA/Caur.EVM.00424-RA/Caur.EVM.37818-RA/Caur.EVM.04596-RA/Caur.EVM.10448-RA/Caur.EVM.28893-RA/Caur.EVM.03566-RA/Cau…	31
GO:0006940	BP	GO:0006940	regulation of smooth muscle contraction	0.0176128	0.710207	0.700923	Caur.EVM.33713-RA/Caur.EVM.39018-RA/Caur.EVM.01339-RA/Caur.EVM.23770-RA/Caur.EVM.04115-RA/Caur.EVM.36482-RA/Caur.EVM.01684-RA/Caur.EVM.17391-RA/Caur.EVM.33688-RA/Caur.EVM.06146-RA/Caur.EVM.25420-RA/Caur.EVM.29051-RA	12
GO:0030178	BP	GO:0030178	negative regulation of Wnt signaling pathway	0.0177456	0.710207	0.700923	Caur.EVM.00956-RA/Caur.EVM.10111-RA/Caur.EVM.08217-RA/Caur.EVM.06722-RA/Caur.EVM.31909-RA/Caur.EVM.13327-RA/Caur.EVM.31233-RA/Caur.EVM.20108-RA/Caur.EVM.12612-RA/Caur.EVM.06939-RA/Caur.EVM.12523-RA/Caur.EVM.27667-RA/Caur.EVM.18109-RA/Caur.EVM.02494-RA/Caur.EVM.34631-RA/Caur.EVM.21776-RA/Caur.EVM.03451-RA/Caur.EVM.15297-RA/Caur.EVM.27887-RA/Caur.EVM.27082-RA/Caur.EVM.32845-RA/Caur.EVM.36020-RA/Cau…	63
GO:1901342	BP	GO:1901342	regulation of vasculature development	0.0180746	0.710207	0.700923	Caur.EVM.36361-RA/Caur.EVM.06565-RA/Caur.EVM.24395-RA/Caur.EVM.29310-RA/Caur.EVM.36979-RA/Caur.EVM.08176-RA/Caur.EVM.27475-RA/Caur.EVM.07350-RA/Caur.EVM.31985-RA/Caur.EVM.27249-RA/Caur.EVM.23276-RA/Caur.EVM.34474-RA/Caur.EVM.11856-RA/Caur.EVM.12902-RA/Caur.EVM.20206-RA/Caur.EVM.18694-RA/Caur.EVM.09640-RA/Caur.EVM.28763-RA/Caur.EVM.21860-RA/Caur.EVM.07685-RA/Caur.EVM.30278-RA/Caur.EVM.23770-RA/Cau…	69
GO:0003146	BP	GO:0003146	heart jogging	0.0183433	0.710207	0.700923	Caur.EVM.10111-RA/Caur.EVM.13327-RA/Caur.EVM.16205-RA/Caur.EVM.30386-RA/Caur.EVM.02865-RA/Caur.EVM.34819-RA/Caur.EVM.37854-RA/Caur.EVM.14230-RA/Caur.EVM.11805-RA/Caur.EVM.17694-RA/Caur.EVM.08742-RA/Caur.EVM.15819-RA/Caur.EVM.08085-RA/Caur.EVM.36693-RA/Caur.EVM.31733-RA/Caur.EVM.12444-RA/Caur.EVM.30683-RA/Caur.EVM.30746-RA/Caur.EVM.03862-RA/Caur.EVM.06347-RA/Caur.EVM.05789-RA/Caur.EVM.05958-RA/Cau…	52
GO:0048262	BP	GO:0048262	determination of dorsal/ventral asymmetry	0.0186193	0.710207	0.700923	Caur.EVM.33870-RA/Caur.EVM.10111-RA/Caur.EVM.35270-RA/Caur.EVM.29275-RA/Caur.EVM.22754-RA/Caur.EVM.34451-RA/Caur.EVM.13327-RA/Caur.EVM.00270-RA/Caur.EVM.16205-RA/Caur.EVM.02865-RA/Caur.EVM.13947-RA/Caur.EVM.14244-RA/Caur.EVM.27945-RA/Caur.EVM.05186-RA/Caur.EVM.17694-RA/Caur.EVM.38198-RA/Caur.EVM.08090-RA/Caur.EVM.02208-RA/Caur.EVM.24484-RA/Caur.EVM.37403-RA/Caur.EVM.12444-RA/Caur.EVM.06347-RA/Cau…	44
GO:0045892	BP	GO:0045892	negative regulation of transcription, DNA-templated	0.0188797	0.710207	0.700923	Caur.EVM.00790-RA/Caur.EVM.33870-RA/Caur.EVM.10111-RA/Caur.EVM.36361-RA/Caur.EVM.05474-RA/Caur.EVM.19653-RA/Caur.EVM.08597-RA/Caur.EVM.02045-RA/Caur.EVM.30544-RA/Caur.EVM.34307-RA/Caur.EVM.02581-RA/Caur.EVM.22754-RA/Caur.EVM.26873-RA/Caur.EVM.13327-RA/Caur.EVM.26955-RA/Caur.EVM.22540-RA/Caur.EVM.22498-RA/Caur.EVM.27741-RA/Caur.EVM.24709-RA/Caur.EVM.33474-RA/Caur.EVM.11044-RA/Caur.EVM.37534-RA/Cau…	238
GO:1902679	BP	GO:1902679	negative regulation of RNA biosynthetic process	0.0188797	0.710207	0.700923	Caur.EVM.00790-RA/Caur.EVM.33870-RA/Caur.EVM.10111-RA/Caur.EVM.36361-RA/Caur.EVM.05474-RA/Caur.EVM.19653-RA/Caur.EVM.08597-RA/Caur.EVM.02045-RA/Caur.EVM.30544-RA/Caur.EVM.34307-RA/Caur.EVM.02581-RA/Caur.EVM.22754-RA/Caur.EVM.26873-RA/Caur.EVM.13327-RA/Caur.EVM.26955-RA/Caur.EVM.22540-RA/Caur.EVM.22498-RA/Caur.EVM.27741-RA/Caur.EVM.24709-RA/Caur.EVM.33474-RA/Caur.EVM.11044-RA/Caur.EVM.37534-RA/Cau…	238
GO:1903507	BP	GO:1903507	negative regulation of nucleic acid-templated transcription	0.0188797	0.710207	0.700923	Caur.EVM.00790-RA/Caur.EVM.33870-RA/Caur.EVM.10111-RA/Caur.EVM.36361-RA/Caur.EVM.05474-RA/Caur.EVM.19653-RA/Caur.EVM.08597-RA/Caur.EVM.02045-RA/Caur.EVM.30544-RA/Caur.EVM.34307-RA/Caur.EVM.02581-RA/Caur.EVM.22754-RA/Caur.EVM.26873-RA/Caur.EVM.13327-RA/Caur.EVM.26955-RA/Caur.EVM.22540-RA/Caur.EVM.22498-RA/Caur.EVM.27741-RA/Caur.EVM.24709-RA/Caur.EVM.33474-RA/Caur.EVM.11044-RA/Caur.EVM.37534-RA/Cau…	238
GO:0055117	BP	GO:0055117	regulation of cardiac muscle contraction	0.019161	0.710207	0.700923	Caur.EVM.38296-RA/Caur.EVM.14597-RA/Caur.EVM.15340-RA/Caur.EVM.38295-RA/Caur.EVM.14849-RA/Caur.EVM.01684-RA/Caur.EVM.33407-RA/Caur.EVM.15363-RA/Caur.EVM.14880-RA/Caur.EVM.12802-RA/Caur.EVM.25096-RA/Caur.EVM.25420-RA/Caur.EVM.27868-RA/Caur.EVM.09638-RA	14
GO:0010923	BP	GO:0010923	negative regulation of phosphatase activity	0.0194665	0.710207	0.700923	Caur.EVM.31264-RA/Caur.EVM.28267-RA/Caur.EVM.33663-RA/Caur.EVM.33662-RA/Caur.EVM.37402-RA/Caur.EVM.32420-RA/Caur.EVM.02329-RA/Caur.EVM.01278-RA/Caur.EVM.17272-RA/Caur.EVM.20835-RA/Caur.EVM.18682-RA/Caur.EVM.14931-RA/Caur.EVM.11559-RA/Caur.EVM.37249-RA/Caur.EVM.26862-RA/Caur.EVM.16946-RA/Caur.EVM.22484-RA/Caur.EVM.12941-RA	18
GO:0043500	BP	GO:0043500	muscle adaptation	0.0194665	0.710207	0.700923	Caur.EVM.37501-RA/Caur.EVM.00531-RA/Caur.EVM.33703-RA/Caur.EVM.37388-RA/Caur.EVM.10070-RA/Caur.EVM.10048-RA/Caur.EVM.07637-RA/Caur.EVM.13141-RA/Caur.EVM.34355-RA/Caur.EVM.04744-RA/Caur.EVM.17742-RA/Caur.EVM.15363-RA/Caur.EVM.12802-RA/Caur.EVM.09856-RA/Caur.EVM.36139-RA/Caur.EVM.02690-RA/Caur.EVM.17863-RA/Caur.EVM.33554-RA	18
GO:0060034	BP	GO:0060034	notochord cell differentiation	0.0194665	0.710207	0.700923	Caur.EVM.10111-RA/Caur.EVM.13327-RA/Caur.EVM.06565-RA/Caur.EVM.29310-RA/Caur.EVM.12834-RA/Caur.EVM.02370-RA/Caur.EVM.33249-RA/Caur.EVM.00049-RA/Caur.EVM.12444-RA/Caur.EVM.06347-RA/Caur.EVM.00982-RA/Caur.EVM.23082-RA/Caur.EVM.33613-RA/Caur.EVM.27687-RA/Caur.EVM.01228-RA/Caur.EVM.19606-RA/Caur.EVM.23874-RA/Caur.EVM.19070-RA	18
GO:1903169	BP	GO:1903169	regulation of calcium ion transmembrane transport	0.0194665	0.710207	0.700923	Caur.EVM.17192-RA/Caur.EVM.14597-RA/Caur.EVM.13589-RA/Caur.EVM.39018-RA/Caur.EVM.08680-RA/Caur.EVM.14849-RA/Caur.EVM.10135-RA/Caur.EVM.36482-RA/Caur.EVM.34853-RA/Caur.EVM.33407-RA/Caur.EVM.14880-RA/Caur.EVM.25096-RA/Caur.EVM.27868-RA/Caur.EVM.09241-RA/Caur.EVM.26888-RA/Caur.EVM.07153-RA/Caur.EVM.09638-RA/Caur.EVM.13304-RA	18
GO:2000736	BP	GO:2000736	regulation of stem cell differentiation	0.0194666	0.710207	0.700923	Caur.EVM.33870-RA/Caur.EVM.10111-RA/Caur.EVM.22754-RA/Caur.EVM.07496-RA/Caur.EVM.13327-RA/Caur.EVM.06565-RA/Caur.EVM.29310-RA/Caur.EVM.10205-RA/Caur.EVM.02494-RA/Caur.EVM.36943-RA/Caur.EVM.37167-RA/Caur.EVM.05380-RA/Caur.EVM.12118-RA/Caur.EVM.11553-RA/Caur.EVM.20386-RA/Caur.EVM.15460-RA/Caur.EVM.18123-RA/Caur.EVM.30195-RA/Caur.EVM.32869-RA/Caur.EVM.27096-RA/Caur.EVM.23823-RA/Caur.EVM.06188-RA/Cau…	34
GO:0045934	BP	GO:0045934	negative regulation of nucleobase-containing compound metabolic process	0.0196153	0.710207	0.700923	Caur.EVM.00790-RA/Caur.EVM.33870-RA/Caur.EVM.32380-RA/Caur.EVM.10111-RA/Caur.EVM.36361-RA/Caur.EVM.18178-RA/Caur.EVM.06479-RA/Caur.EVM.05474-RA/Caur.EVM.19653-RA/Caur.EVM.08597-RA/Caur.EVM.02045-RA/Caur.EVM.30544-RA/Caur.EVM.34307-RA/Caur.EVM.14532-RA/Caur.EVM.02581-RA/Caur.EVM.22754-RA/Caur.EVM.26873-RA/Caur.EVM.13327-RA/Caur.EVM.26955-RA/Caur.EVM.22540-RA/Caur.EVM.22498-RA/Caur.EVM.27741-RA/Cau…	289
GO:0060571	BP	GO:0060571	morphogenesis of an epithelial fold	0.0196459	0.710207	0.700923	Caur.EVM.33870-RA/Caur.EVM.17389-RA/Caur.EVM.29275-RA/Caur.EVM.22754-RA/Caur.EVM.28763-RA/Caur.EVM.17154-RA/Caur.EVM.29166-RA/Caur.EVM.35113-RA/Caur.EVM.27096-RA/Caur.EVM.25283-RA/Caur.EVM.23181-RA/Caur.EVM.01989-RA/Caur.EVM.32913-RA/Caur.EVM.32799-RA/Caur.EVM.38342-RA/Caur.EVM.21176-RA	16
GO:0003143	BP	GO:0003143	embryonic heart tube morphogenesis	0.0196809	0.710207	0.700923	Caur.EVM.07485-RA/Caur.EVM.10111-RA/Caur.EVM.09823-RA/Caur.EVM.23595-RA/Caur.EVM.17438-RA/Caur.EVM.04461-RA/Caur.EVM.02581-RA/Caur.EVM.13327-RA/Caur.EVM.22498-RA/Caur.EVM.09556-RA/Caur.EVM.02913-RA/Caur.EVM.33352-RA/Caur.EVM.11020-RA/Caur.EVM.36319-RA/Caur.EVM.36338-RA/Caur.EVM.24453-RA/Caur.EVM.14092-RA/Caur.EVM.16205-RA/Caur.EVM.38286-RA/Caur.EVM.02494-RA/Caur.EVM.14597-RA/Caur.EVM.13245-RA/Cau…	124
GO:0048732	BP	GO:0048732	gland development	0.019784	0.710207	0.700923	Caur.EVM.19763-RA/Caur.EVM.36862-RA/Caur.EVM.33870-RA/Caur.EVM.10111-RA/Caur.EVM.36361-RA/Caur.EVM.09823-RA/Caur.EVM.31910-RA/Caur.EVM.15298-RA/Caur.EVM.15299-RA/Caur.EVM.32547-RA/Caur.EVM.08217-RA/Caur.EVM.01844-RA/Caur.EVM.36863-RA/Caur.EVM.32548-RA/Caur.EVM.26388-RA/Caur.EVM.01167-RA/Caur.EVM.19653-RA/Caur.EVM.08597-RA/Caur.EVM.17438-RA/Caur.EVM.02581-RA/Caur.EVM.22754-RA/Caur.EVM.34451-RA/Cau…	243
GO:0008354	BP	GO:0008354	germ cell migration	0.020453	0.71477	0.705426	Caur.EVM.13816-RA/Caur.EVM.30304-RA/Caur.EVM.23098-RA/Caur.EVM.19290-RA/Caur.EVM.27570-RA/Caur.EVM.34437-RA/Caur.EVM.07559-RA/Caur.EVM.05069-RA/Caur.EVM.16485-RA/Caur.EVM.24546-RA/Caur.EVM.37761-RA/Caur.EVM.34485-RA/Caur.EVM.33167-RA/Caur.EVM.37732-RA/Caur.EVM.11254-RA/Caur.EVM.23823-RA/Caur.EVM.06188-RA/Caur.EVM.03744-RA/Caur.EVM.34853-RA/Caur.EVM.26017-RA/Caur.EVM.09632-RA/Caur.EVM.23097-RA/Cau…	27
GO:0098660	BP	GO:0098660	inorganic ion transmembrane transport	0.0217372	0.71477	0.705426	Caur.EVM.35230-RA/Caur.EVM.19575-RA/Caur.EVM.19925-RA/Caur.EVM.15528-RA/Caur.EVM.34322-RA/Caur.EVM.04463-RA/Caur.EVM.38821-RA/Caur.EVM.21117-RA/Caur.EVM.24335-RA/Caur.EVM.11447-RA/Caur.EVM.17192-RA/Caur.EVM.14898-RA/Caur.EVM.16220-RA/Caur.EVM.02968-RA/Caur.EVM.14597-RA/Caur.EVM.13245-RA/Caur.EVM.13296-RA/Caur.EVM.28075-RA/Caur.EVM.11332-RA/Caur.EVM.25400-RA/Caur.EVM.01549-RA/Caur.EVM.32638-RA/Cau…	182
GO:0043414	BP	GO:0043414	macromolecule methylation	0.0217838	0.71477	0.705426	Caur.EVM.20915-RA/Caur.EVM.05657-RA/Caur.EVM.11899-RA/Caur.EVM.26047-RA/Caur.EVM.08597-RA/Caur.EVM.28752-RA/Caur.EVM.05768-RA/Caur.EVM.21729-RA/Caur.EVM.04832-RA/Caur.EVM.24709-RA/Caur.EVM.14638-RA/Caur.EVM.34170-RA/Caur.EVM.00101-RA/Caur.EVM.30244-RA/Caur.EVM.17032-RA/Caur.EVM.10659-RA/Caur.EVM.02076-RA/Caur.EVM.30758-RA/Caur.EVM.18843-RA/Caur.EVM.08273-RA/Caur.EVM.10544-RA/Caur.EVM.33459-RA/Cau…	62
GO:0042440	BP	GO:0042440	pigment metabolic process	0.0232652	0.71477	0.705426	Caur.EVM.06565-RA/Caur.EVM.11833-RA/Caur.EVM.29310-RA/Caur.EVM.19739-RA/Caur.EVM.30953-RA/Caur.EVM.38877-RA/Caur.EVM.07976-RA/Caur.EVM.04218-RA/Caur.EVM.14480-RA/Caur.EVM.36016-RA/Caur.EVM.20386-RA/Caur.EVM.39256-RA/Caur.EVM.35687-RA/Caur.EVM.10945-RA/Caur.EVM.37285-RA/Caur.EVM.17228-RA/Caur.EVM.29957-RA/Caur.EVM.29143-RA/Caur.EVM.12823-RA/Caur.EVM.15846-RA/Caur.EVM.35626-RA/Caur.EVM.03751-RA/Cau…	30
GO:0051969	BP	GO:0051969	regulation of transmission of nerve impulse	0.0237741	0.71477	0.705426	Caur.EVM.06479-RA/Caur.EVM.19653-RA/Caur.EVM.19925-RA/Caur.EVM.11833-RA/Caur.EVM.01273-RA/Caur.EVM.19767-RA/Caur.EVM.11799-RA/Caur.EVM.23034-RA/Caur.EVM.14811-RA/Caur.EVM.25400-RA/Caur.EVM.18258-RA/Caur.EVM.17083-RA/Caur.EVM.06738-RA/Caur.EVM.13153-RA/Caur.EVM.27561-RA/Caur.EVM.04218-RA/Caur.EVM.33434-RA/Caur.EVM.14480-RA/Caur.EVM.21030-RA/Caur.EVM.19411-RA/Caur.EVM.15340-RA/Caur.EVM.13035-RA/Cau…	78
GO:0001783	BP	GO:0001783	B cell apoptotic process	0.0239395	0.71477	0.705426	Caur.EVM.20606-RA/Caur.EVM.05445-RA/Caur.EVM.11833-RA/Caur.EVM.08247-RA/Caur.EVM.02928-RA/Caur.EVM.28564-RA/Caur.EVM.15846-RA/Caur.EVM.14546-RA/Caur.EVM.14547-RA	9
GO:0002467	BP	GO:0002467	germinal center formation	0.0239395	0.71477	0.705426	Caur.EVM.11805-RA/Caur.EVM.00572-RA/Caur.EVM.33703-RA/Caur.EVM.15819-RA/Caur.EVM.22179-RA/Caur.EVM.34355-RA/Caur.EVM.03654-RA/Caur.EVM.04836-RA/Caur.EVM.38881-RA	9
GO:0002634	BP	GO:0002634	regulation of germinal center formation	0.0239395	0.71477	0.705426	Caur.EVM.11805-RA/Caur.EVM.00572-RA/Caur.EVM.33703-RA/Caur.EVM.15819-RA/Caur.EVM.22179-RA/Caur.EVM.34355-RA/Caur.EVM.03654-RA/Caur.EVM.04836-RA/Caur.EVM.38881-RA	9
GO:0002902	BP	GO:0002902	regulation of B cell apoptotic process	0.0239395	0.71477	0.705426	Caur.EVM.20606-RA/Caur.EVM.05445-RA/Caur.EVM.11833-RA/Caur.EVM.08247-RA/Caur.EVM.02928-RA/Caur.EVM.28564-RA/Caur.EVM.15846-RA/Caur.EVM.14546-RA/Caur.EVM.14547-RA	9
GO:0018993	BP	GO:0018993	somatic sex determination	0.0239395	0.71477	0.705426	Caur.EVM.30544-RA/Caur.EVM.22540-RA/Caur.EVM.33894-RA/Caur.EVM.30559-RA/Caur.EVM.10120-RA/Caur.EVM.25283-RA/Caur.EVM.02241-RA/Caur.EVM.32799-RA/Caur.EVM.13315-RA	9
GO:0033081	BP	GO:0033081	regulation of T cell differentiation in thymus	0.0239395	0.71477	0.705426	Caur.EVM.24145-RA/Caur.EVM.11805-RA/Caur.EVM.15819-RA/Caur.EVM.25283-RA/Caur.EVM.29103-RA/Caur.EVM.01526-RA/Caur.EVM.03654-RA/Caur.EVM.32799-RA/Caur.EVM.09201-RA	9
GO:0046112	BP	GO:0046112	nucleobase biosynthetic process	0.0239395	0.71477	0.705426	Caur.EVM.07769-RA/Caur.EVM.07976-RA/Caur.EVM.39256-RA/Caur.EVM.38130-RA/Caur.EVM.15135-RA/Caur.EVM.12823-RA/Caur.EVM.35626-RA/Caur.EVM.29095-RA/Caur.EVM.30184-RA	9
GO:0046697	BP	GO:0046697	decidualization	0.0239395	0.71477	0.705426	Caur.EVM.02581-RA/Caur.EVM.22498-RA/Caur.EVM.11045-RA/Caur.EVM.28086-RA/Caur.EVM.23770-RA/Caur.EVM.33717-RA/Caur.EVM.06146-RA/Caur.EVM.34340-RA/Caur.EVM.26814-RA	9
GO:0060174	BP	GO:0060174	limb bud formation	0.0239395	0.71477	0.705426	Caur.EVM.03732-RA/Caur.EVM.29335-RA/Caur.EVM.15760-RA/Caur.EVM.15209-RA/Caur.EVM.11078-RA/Caur.EVM.01882-RA/Caur.EVM.29862-RA/Caur.EVM.31936-RA/Caur.EVM.32037-RA	9
GO:0071910	BP	GO:0071910	determination of liver left/right asymmetry	0.0239395	0.71477	0.705426	Caur.EVM.10111-RA/Caur.EVM.13327-RA/Caur.EVM.02913-RA/Caur.EVM.02494-RA/Caur.EVM.18123-RA/Caur.EVM.12444-RA/Caur.EVM.06347-RA/Caur.EVM.35174-RA/Caur.EVM.24632-RA	9
GO:0045666	BP	GO:0045666	positive regulation of neuron differentiation	0.0239596	0.71477	0.705426	Caur.EVM.10111-RA/Caur.EVM.19653-RA/Caur.EVM.13327-RA/Caur.EVM.37937-RA/Caur.EVM.23034-RA/Caur.EVM.30559-RA/Caur.EVM.18355-RA/Caur.EVM.00179-RA/Caur.EVM.17083-RA/Caur.EVM.01389-RA/Caur.EVM.09965-RA/Caur.EVM.17769-RA/Caur.EVM.20386-RA/Caur.EVM.38367-RA/Caur.EVM.19411-RA/Caur.EVM.33713-RA/Caur.EVM.33703-RA/Caur.EVM.31754-RA/Caur.EVM.20624-RA/Caur.EVM.17154-RA/Caur.EVM.30195-RA/Caur.EVM.10980-RA/Cau…	75
GO:0048514	BP	GO:0048514	blood vessel morphogenesis	0.0244566	0.71477	0.705426	Caur.EVM.21713-RA/Caur.EVM.33870-RA/Caur.EVM.20226-RA/Caur.EVM.36361-RA/Caur.EVM.08121-RA/Caur.EVM.23310-RA/Caur.EVM.02581-RA/Caur.EVM.22754-RA/Caur.EVM.38156-RA/Caur.EVM.25992-RA/Caur.EVM.03649-RA/Caur.EVM.22498-RA/Caur.EVM.06565-RA/Caur.EVM.10529-RA/Caur.EVM.11833-RA/Caur.EVM.27934-RA/Caur.EVM.24395-RA/Caur.EVM.17945-RA/Caur.EVM.19788-RA/Caur.EVM.24408-RA/Caur.EVM.16302-RA/Caur.EVM.17220-RA/Cau…	276
GO:0030278	BP	GO:0030278	regulation of ossification	0.0246265	0.71477	0.705426	Caur.EVM.33870-RA/Caur.EVM.10111-RA/Caur.EVM.03732-RA/Caur.EVM.22754-RA/Caur.EVM.34451-RA/Caur.EVM.13327-RA/Caur.EVM.19767-RA/Caur.EVM.30386-RA/Caur.EVM.02865-RA/Caur.EVM.03451-RA/Caur.EVM.29335-RA/Caur.EVM.14230-RA/Caur.EVM.36020-RA/Caur.EVM.05194-RA/Caur.EVM.11491-RA/Caur.EVM.06340-RA/Caur.EVM.33703-RA/Caur.EVM.35656-RA/Caur.EVM.28763-RA/Caur.EVM.36693-RA/Caur.EVM.10120-RA/Caur.EVM.04720-RA/Cau…	46
GO:0046552	BP	GO:0046552	photoreceptor cell fate commitment	0.0253557	0.71477	0.705426	Caur.EVM.07496-RA/Caur.EVM.36319-RA/Caur.EVM.30559-RA/Caur.EVM.05380-RA/Caur.EVM.11553-RA/Caur.EVM.09583-RA/Caur.EVM.32802-RA/Caur.EVM.00049-RA/Caur.EVM.25513-RA/Caur.EVM.24133-RA/Caur.EVM.04664-RA/Caur.EVM.32232-RA/Caur.EVM.02241-RA/Caur.EVM.13212-RA/Caur.EVM.09212-RA/Caur.EVM.37663-RA/Caur.EVM.14116-RA/Caur.EVM.25205-RA/Caur.EVM.34954-RA/Caur.EVM.23139-RA/Caur.EVM.06323-RA	21
GO:0001946	BP	GO:0001946	lymphangiogenesis	0.0253952	0.71477	0.705426	Caur.EVM.20226-RA/Caur.EVM.09321-RA/Caur.EVM.24029-RA/Caur.EVM.25992-RA/Caur.EVM.09016-RA/Caur.EVM.29925-RA/Caur.EVM.30304-RA/Caur.EVM.30386-RA/Caur.EVM.14230-RA/Caur.EVM.18721-RA/Caur.EVM.18694-RA/Caur.EVM.34485-RA/Caur.EVM.30278-RA/Caur.EVM.23558-RA/Caur.EVM.11577-RA/Caur.EVM.00424-RA/Caur.EVM.37818-RA/Caur.EVM.04596-RA/Caur.EVM.10448-RA/Caur.EVM.28893-RA/Caur.EVM.25903-RA/Caur.EVM.25918-RA/Cau…	28
GO:0036303	BP	GO:0036303	lymph vessel morphogenesis	0.0253952	0.71477	0.705426	Caur.EVM.20226-RA/Caur.EVM.09321-RA/Caur.EVM.24029-RA/Caur.EVM.25992-RA/Caur.EVM.09016-RA/Caur.EVM.29925-RA/Caur.EVM.30304-RA/Caur.EVM.30386-RA/Caur.EVM.14230-RA/Caur.EVM.18721-RA/Caur.EVM.18694-RA/Caur.EVM.34485-RA/Caur.EVM.30278-RA/Caur.EVM.23558-RA/Caur.EVM.11577-RA/Caur.EVM.00424-RA/Caur.EVM.37818-RA/Caur.EVM.04596-RA/Caur.EVM.10448-RA/Caur.EVM.28893-RA/Caur.EVM.25903-RA/Caur.EVM.25918-RA/Cau…	28
GO:0035567	BP	GO:0035567	non-canonical Wnt signaling pathway	0.0255671	0.71477	0.705426	Caur.EVM.08217-RA/Caur.EVM.31909-RA/Caur.EVM.03315-RA/Caur.EVM.26557-RA/Caur.EVM.31233-RA/Caur.EVM.14410-RA/Caur.EVM.26640-RA/Caur.EVM.27667-RA/Caur.EVM.15297-RA/Caur.EVM.36231-RA/Caur.EVM.34819-RA/Caur.EVM.36016-RA/Caur.EVM.20027-RA/Caur.EVM.13890-RA/Caur.EVM.01504-RA/Caur.EVM.07685-RA/Caur.EVM.30195-RA/Caur.EVM.14433-RA/Caur.EVM.25880-RA/Caur.EVM.37370-RA/Caur.EVM.18824-RA/Caur.EVM.02647-RA/Cau…	33
GO:0048332	BP	GO:0048332	mesoderm morphogenesis	0.0258721	0.71477	0.705426	Caur.EVM.00956-RA/Caur.EVM.20226-RA/Caur.EVM.10111-RA/Caur.EVM.05187-RA/Caur.EVM.37837-RA/Caur.EVM.25992-RA/Caur.EVM.13327-RA/Caur.EVM.06565-RA/Caur.EVM.00270-RA/Caur.EVM.19767-RA/Caur.EVM.12612-RA/Caur.EVM.30304-RA/Caur.EVM.29310-RA/Caur.EVM.23098-RA/Caur.EVM.16205-RA/Caur.EVM.34437-RA/Caur.EVM.30386-RA/Caur.EVM.02865-RA/Caur.EVM.21776-RA/Caur.EVM.31852-RA/Caur.EVM.12405-RA/Caur.EVM.36231-RA/Cau…	95
GO:0034765	BP	GO:0034765	regulation of ion transmembrane transport	0.0260889	0.71477	0.705426	Caur.EVM.05054-RA/Caur.EVM.24335-RA/Caur.EVM.17192-RA/Caur.EVM.14597-RA/Caur.EVM.25400-RA/Caur.EVM.25554-RA/Caur.EVM.01094-RA/Caur.EVM.12558-RA/Caur.EVM.27202-RA/Caur.EVM.03857-RA/Caur.EVM.22304-RA/Caur.EVM.21030-RA/Caur.EVM.33136-RA/Caur.EVM.13589-RA/Caur.EVM.39018-RA/Caur.EVM.08680-RA/Caur.EVM.01785-RA/Caur.EVM.13523-RA/Caur.EVM.15203-RA/Caur.EVM.17503-RA/Caur.EVM.16248-RA/Caur.EVM.33241-RA/Cau…	105
GO:0045862	BP	GO:0045862	positive regulation of proteolysis	0.0265062	0.71477	0.705426	Caur.EVM.30598-RA/Caur.EVM.30544-RA/Caur.EVM.22540-RA/Caur.EVM.11833-RA/Caur.EVM.24395-RA/Caur.EVM.15566-RA/Caur.EVM.10995-RA/Caur.EVM.36113-RA/Caur.EVM.23490-RA/Caur.EVM.07776-RA/Caur.EVM.12523-RA/Caur.EVM.08247-RA/Caur.EVM.25235-RA/Caur.EVM.02494-RA/Caur.EVM.36979-RA/Caur.EVM.19189-RA/Caur.EVM.34631-RA/Caur.EVM.03585-RA/Caur.EVM.27475-RA/Caur.EVM.01522-RA/Caur.EVM.15994-RA/Caur.EVM.35947-RA/Cau…	70
GO:0060973	BP	GO:0060973	cell migration involved in heart development	0.0268904	0.71477	0.705426	Caur.EVM.26738-RA/Caur.EVM.11020-RA/Caur.EVM.36338-RA/Caur.EVM.30091-RA/Caur.EVM.38286-RA/Caur.EVM.13245-RA/Caur.EVM.14387-RA/Caur.EVM.30251-RA/Caur.EVM.18043-RA/Caur.EVM.34474-RA/Caur.EVM.19001-RA/Caur.EVM.22775-RA/Caur.EVM.04654-RA/Caur.EVM.16794-RA/Caur.EVM.05848-RA/Caur.EVM.00914-RA/Caur.EVM.18979-RA/Caur.EVM.09118-RA/Caur.EVM.10650-RA	19
GO:0072010	BP	GO:0072010	glomerular epithelium development	0.0268904	0.71477	0.705426	Caur.EVM.01167-RA/Caur.EVM.16241-RA/Caur.EVM.33564-RA/Caur.EVM.30304-RA/Caur.EVM.21563-RA/Caur.EVM.02951-RA/Caur.EVM.34485-RA/Caur.EVM.06715-RA/Caur.EVM.01955-RA/Caur.EVM.33956-RA/Caur.EVM.20095-RA/Caur.EVM.35950-RA/Caur.EVM.22845-RA/Caur.EVM.02290-RA/Caur.EVM.19783-RA/Caur.EVM.02070-RA/Caur.EVM.26361-RA/Caur.EVM.34649-RA/Caur.EVM.08656-RA	19
GO:0072112	BP	GO:0072112	glomerular visceral epithelial cell differentiation	0.0268904	0.71477	0.705426	Caur.EVM.01167-RA/Caur.EVM.16241-RA/Caur.EVM.33564-RA/Caur.EVM.30304-RA/Caur.EVM.21563-RA/Caur.EVM.02951-RA/Caur.EVM.34485-RA/Caur.EVM.06715-RA/Caur.EVM.01955-RA/Caur.EVM.33956-RA/Caur.EVM.20095-RA/Caur.EVM.35950-RA/Caur.EVM.22845-RA/Caur.EVM.02290-RA/Caur.EVM.19783-RA/Caur.EVM.02070-RA/Caur.EVM.26361-RA/Caur.EVM.34649-RA/Caur.EVM.08656-RA	19
GO:0072311	BP	GO:0072311	glomerular epithelial cell differentiation	0.0268904	0.71477	0.705426	Caur.EVM.01167-RA/Caur.EVM.16241-RA/Caur.EVM.33564-RA/Caur.EVM.30304-RA/Caur.EVM.21563-RA/Caur.EVM.02951-RA/Caur.EVM.34485-RA/Caur.EVM.06715-RA/Caur.EVM.01955-RA/Caur.EVM.33956-RA/Caur.EVM.20095-RA/Caur.EVM.35950-RA/Caur.EVM.22845-RA/Caur.EVM.02290-RA/Caur.EVM.19783-RA/Caur.EVM.02070-RA/Caur.EVM.26361-RA/Caur.EVM.34649-RA/Caur.EVM.08656-RA	19
GO:0044057	BP	GO:0044057	regulation of system process	0.0271099	0.71477	0.705426	Caur.EVM.06479-RA/Caur.EVM.19653-RA/Caur.EVM.19925-RA/Caur.EVM.38296-RA/Caur.EVM.37501-RA/Caur.EVM.11833-RA/Caur.EVM.01273-RA/Caur.EVM.19767-RA/Caur.EVM.19788-RA/Caur.EVM.11799-RA/Caur.EVM.36319-RA/Caur.EVM.33663-RA/Caur.EVM.23034-RA/Caur.EVM.14811-RA/Caur.EVM.14597-RA/Caur.EVM.33662-RA/Caur.EVM.30386-RA/Caur.EVM.34631-RA/Caur.EVM.25400-RA/Caur.EVM.18258-RA/Caur.EVM.17083-RA/Caur.EVM.06738-RA/Cau…	165
GO:0010942	BP	GO:0010942	positive regulation of cell death	0.0271705	0.71477	0.705426	Caur.EVM.10111-RA/Caur.EVM.30598-RA/Caur.EVM.30544-RA/Caur.EVM.27603-RA/Caur.EVM.11043-RA/Caur.EVM.07496-RA/Caur.EVM.33606-RA/Caur.EVM.38517-RA/Caur.EVM.13327-RA/Caur.EVM.22540-RA/Caur.EVM.11833-RA/Caur.EVM.24395-RA/Caur.EVM.04013-RA/Caur.EVM.15566-RA/Caur.EVM.10995-RA/Caur.EVM.36113-RA/Caur.EVM.30114-RA/Caur.EVM.16302-RA/Caur.EVM.14239-RA/Caur.EVM.04675-RA/Caur.EVM.23490-RA/Caur.EVM.07776-RA/Cau…	176
GO:0015893	BP	GO:0015893	drug transport	0.0271917	0.71477	0.705426	Caur.EVM.21737-RA/Caur.EVM.21738-RA/Caur.EVM.10554-RA/Caur.EVM.08247-RA/Caur.EVM.13296-RA/Caur.EVM.37833-RA/Caur.EVM.06738-RA/Caur.EVM.18208-RA/Caur.EVM.28913-RA/Caur.EVM.13035-RA/Caur.EVM.33703-RA/Caur.EVM.28198-RA/Caur.EVM.19817-RA/Caur.EVM.17014-RA/Caur.EVM.18886-RA/Caur.EVM.10553-RA/Caur.EVM.15110-RA/Caur.EVM.30019-RA/Caur.EVM.17404-RA/Caur.EVM.18038-RA/Caur.EVM.34355-RA/Caur.EVM.06004-RA/Cau…	44
GO:0045778	BP	GO:0045778	positive regulation of ossification	0.0276791	0.71477	0.705426	Caur.EVM.33870-RA/Caur.EVM.10111-RA/Caur.EVM.22754-RA/Caur.EVM.34451-RA/Caur.EVM.13327-RA/Caur.EVM.30386-RA/Caur.EVM.02865-RA/Caur.EVM.14230-RA/Caur.EVM.05194-RA/Caur.EVM.33703-RA/Caur.EVM.35656-RA/Caur.EVM.36693-RA/Caur.EVM.10120-RA/Caur.EVM.27096-RA/Caur.EVM.34853-RA/Caur.EVM.34355-RA/Caur.EVM.05953-RA/Caur.EVM.33688-RA/Caur.EVM.01088-RA/Caur.EVM.26140-RA/Caur.EVM.38342-RA/Caur.EVM.08668-RA/Cau…	26
GO:0050771	BP	GO:0050771	negative regulation of axonogenesis	0.0276791	0.71477	0.705426	Caur.EVM.37453-RA/Caur.EVM.06565-RA/Caur.EVM.11833-RA/Caur.EVM.29310-RA/Caur.EVM.00179-RA/Caur.EVM.35843-RA/Caur.EVM.20386-RA/Caur.EVM.07302-RA/Caur.EVM.30195-RA/Caur.EVM.10978-RA/Caur.EVM.11597-RA/Caur.EVM.19002-RA/Caur.EVM.15846-RA/Caur.EVM.21271-RA/Caur.EVM.16201-RA/Caur.EVM.14997-RA/Caur.EVM.22875-RA/Caur.EVM.15155-RA/Caur.EVM.35630-RA/Caur.EVM.09118-RA/Caur.EVM.36743-RA/Caur.EVM.18722-RA/Cau…	26
GO:0001893	BP	GO:0001893	maternal placenta development	0.0277856	0.71477	0.705426	Caur.EVM.02581-RA/Caur.EVM.22498-RA/Caur.EVM.11045-RA/Caur.EVM.13153-RA/Caur.EVM.28086-RA/Caur.EVM.04730-RA/Caur.EVM.23770-RA/Caur.EVM.33717-RA/Caur.EVM.06146-RA/Caur.EVM.34340-RA/Caur.EVM.26814-RA	11
GO:0003190	BP	GO:0003190	atrioventricular valve formation	0.0277856	0.71477	0.705426	Caur.EVM.36361-RA/Caur.EVM.11020-RA/Caur.EVM.36338-RA/Caur.EVM.27117-RA/Caur.EVM.15209-RA/Caur.EVM.11078-RA/Caur.EVM.01882-RA/Caur.EVM.31936-RA/Caur.EVM.38361-RA/Caur.EVM.20038-RA/Caur.EVM.19579-RA	11
GO:0003260	BP	GO:0003260	cardioblast migration	0.0277856	0.71477	0.705426	Caur.EVM.26738-RA/Caur.EVM.30091-RA/Caur.EVM.38286-RA/Caur.EVM.14387-RA/Caur.EVM.30251-RA/Caur.EVM.34474-RA/Caur.EVM.19001-RA/Caur.EVM.16794-RA/Caur.EVM.05848-RA/Caur.EVM.09118-RA/Caur.EVM.10650-RA	11
GO:0045445	BP	GO:0045445	myoblast differentiation	0.0277856	0.71477	0.705426	Caur.EVM.02494-RA/Caur.EVM.05194-RA/Caur.EVM.33703-RA/Caur.EVM.18123-RA/Caur.EVM.35656-RA/Caur.EVM.24133-RA/Caur.EVM.11254-RA/Caur.EVM.34853-RA/Caur.EVM.34355-RA/Caur.EVM.23259-RA/Caur.EVM.09212-RA	11
GO:0060975	BP	GO:0060975	cardioblast migration to the midline involved in heart field formation	0.0277856	0.71477	0.705426	Caur.EVM.26738-RA/Caur.EVM.30091-RA/Caur.EVM.38286-RA/Caur.EVM.14387-RA/Caur.EVM.30251-RA/Caur.EVM.34474-RA/Caur.EVM.19001-RA/Caur.EVM.16794-RA/Caur.EVM.05848-RA/Caur.EVM.09118-RA/Caur.EVM.10650-RA	11
GO:0048705	BP	GO:0048705	skeletal system morphogenesis	0.0279357	0.71477	0.705426	Caur.EVM.17389-RA/Caur.EVM.03732-RA/Caur.EVM.19653-RA/Caur.EVM.02581-RA/Caur.EVM.34451-RA/Caur.EVM.10528-RA/Caur.EVM.22498-RA/Caur.EVM.16813-RA/Caur.EVM.25600-RA/Caur.EVM.29925-RA/Caur.EVM.12612-RA/Caur.EVM.00886-RA/Caur.EVM.21712-RA/Caur.EVM.14522-RA/Caur.EVM.13605-RA/Caur.EVM.31263-RA/Caur.EVM.08247-RA/Caur.EVM.36943-RA/Caur.EVM.38266-RA/Caur.EVM.36718-RA/Caur.EVM.21776-RA/Caur.EVM.37167-RA/Cau…	130
GO:0008586	BP	GO:0008586	imaginal disc-derived wing vein morphogenesis	0.0281968	0.71477	0.705426	Caur.EVM.10111-RA/Caur.EVM.13327-RA/Caur.EVM.33568-RA/Caur.EVM.01171-RA/Caur.EVM.00056-RA/Caur.EVM.15653-RA/Caur.EVM.07299-RA/Caur.EVM.00049-RA/Caur.EVM.27096-RA/Caur.EVM.31032-RA/Caur.EVM.14116-RA/Caur.EVM.20822-RA/Caur.EVM.38854-RA/Caur.EVM.02558-RA/Caur.EVM.34954-RA/Caur.EVM.12971-RA/Caur.EVM.38342-RA	17
GO:0031646	BP	GO:0031646	positive regulation of neurological system process	0.0281968	0.71477	0.705426	Caur.EVM.11833-RA/Caur.EVM.23034-RA/Caur.EVM.17083-RA/Caur.EVM.19411-RA/Caur.EVM.15203-RA/Caur.EVM.31273-RA/Caur.EVM.23770-RA/Caur.EVM.17512-RA/Caur.EVM.39035-RA/Caur.EVM.15846-RA/Caur.EVM.33688-RA/Caur.EVM.06146-RA/Caur.EVM.26862-RA/Caur.EVM.17969-RA/Caur.EVM.38888-RA/Caur.EVM.17970-RA/Caur.EVM.36501-RA	17
GO:0045685	BP	GO:0045685	regulation of glial cell differentiation	0.0281968	0.71477	0.705426	Caur.EVM.10111-RA/Caur.EVM.13327-RA/Caur.EVM.23034-RA/Caur.EVM.21231-RA/Caur.EVM.18207-RA/Caur.EVM.17083-RA/Caur.EVM.20386-RA/Caur.EVM.34119-RA/Caur.EVM.19411-RA/Caur.EVM.15029-RA/Caur.EVM.33216-RA/Caur.EVM.35888-RA/Caur.EVM.32341-RA/Caur.EVM.01989-RA/Caur.EVM.09582-RA/Caur.EVM.17969-RA/Caur.EVM.17970-RA	17
GO:0045637	BP	GO:0045637	regulation of myeloid cell differentiation	0.0285499	0.71477	0.705426	Caur.EVM.33870-RA/Caur.EVM.36361-RA/Caur.EVM.19653-RA/Caur.EVM.22754-RA/Caur.EVM.00857-RA/Caur.EVM.33459-RA/Caur.EVM.08247-RA/Caur.EVM.33019-RA/Caur.EVM.36979-RA/Caur.EVM.24145-RA/Caur.EVM.03585-RA/Caur.EVM.09757-RA/Caur.EVM.14240-RA/Caur.EVM.30986-RA/Caur.EVM.09979-RA/Caur.EVM.15343-RA/Caur.EVM.33703-RA/Caur.EVM.02964-RA/Caur.EVM.28763-RA/Caur.EVM.00049-RA/Caur.EVM.11377-RA/Caur.EVM.15110-RA/Cau…	50
GO:0006936	BP	GO:0006936	muscle contraction	0.0286868	0.71477	0.705426	Caur.EVM.38296-RA/Caur.EVM.32164-RA/Caur.EVM.00564-RA/Caur.EVM.05723-RA/Caur.EVM.31537-RA/Caur.EVM.14597-RA/Caur.EVM.08505-RA/Caur.EVM.03857-RA/Caur.EVM.33713-RA/Caur.EVM.23807-RA/Caur.EVM.13589-RA/Caur.EVM.34735-RA/Caur.EVM.15340-RA/Caur.EVM.39018-RA/Caur.EVM.38295-RA/Caur.EVM.08680-RA/Caur.EVM.37388-RA/Caur.EVM.20791-RA/Caur.EVM.07685-RA/Caur.EVM.30058-RA/Caur.EVM.10070-RA/Caur.EVM.33241-RA/Cau…	74
GO:0001947	BP	GO:0001947	heart looping	0.0289574	0.71477	0.705426	Caur.EVM.07485-RA/Caur.EVM.10111-RA/Caur.EVM.09823-RA/Caur.EVM.23595-RA/Caur.EVM.17438-RA/Caur.EVM.04461-RA/Caur.EVM.02581-RA/Caur.EVM.13327-RA/Caur.EVM.22498-RA/Caur.EVM.09556-RA/Caur.EVM.02913-RA/Caur.EVM.33352-RA/Caur.EVM.11020-RA/Caur.EVM.36319-RA/Caur.EVM.36338-RA/Caur.EVM.24453-RA/Caur.EVM.14092-RA/Caur.EVM.16205-RA/Caur.EVM.38286-RA/Caur.EVM.02494-RA/Caur.EVM.14597-RA/Caur.EVM.36718-RA/Cau…	110
GO:0006942	BP	GO:0006942	regulation of striated muscle contraction	0.0290619	0.71477	0.705426	Caur.EVM.38296-RA/Caur.EVM.14597-RA/Caur.EVM.15340-RA/Caur.EVM.38295-RA/Caur.EVM.14849-RA/Caur.EVM.01684-RA/Caur.EVM.33407-RA/Caur.EVM.15363-RA/Caur.EVM.14880-RA/Caur.EVM.12802-RA/Caur.EVM.25096-RA/Caur.EVM.25420-RA/Caur.EVM.27868-RA/Caur.EVM.09638-RA/Caur.EVM.17242-RA	15
GO:0010226	BP	GO:0010226	response to lithium ion	0.0291291	0.71477	0.705426	Caur.EVM.10070-RA/Caur.EVM.17014-RA/Caur.EVM.23770-RA/Caur.EVM.10135-RA/Caur.EVM.07637-RA/Caur.EVM.17742-RA/Caur.EVM.06146-RA/Caur.EVM.09856-RA/Caur.EVM.36139-RA/Caur.EVM.02690-RA/Caur.EVM.17863-RA/Caur.EVM.13304-RA/Caur.EVM.33554-RA	13
GO:0045582	BP	GO:0045582	positive regulation of T cell differentiation	0.0291291	0.71477	0.705426	Caur.EVM.20606-RA/Caur.EVM.05445-RA/Caur.EVM.19653-RA/Caur.EVM.38296-RA/Caur.EVM.38120-RA/Caur.EVM.38295-RA/Caur.EVM.04686-RA/Caur.EVM.25283-RA/Caur.EVM.29103-RA/Caur.EVM.16446-RA/Caur.EVM.14071-RA/Caur.EVM.32799-RA/Caur.EVM.13190-RA	13
GO:0045621	BP	GO:0045621	positive regulation of lymphocyte differentiation	0.0291291	0.71477	0.705426	Caur.EVM.20606-RA/Caur.EVM.05445-RA/Caur.EVM.19653-RA/Caur.EVM.38296-RA/Caur.EVM.38120-RA/Caur.EVM.38295-RA/Caur.EVM.04686-RA/Caur.EVM.25283-RA/Caur.EVM.29103-RA/Caur.EVM.16446-RA/Caur.EVM.14071-RA/Caur.EVM.32799-RA/Caur.EVM.13190-RA	13
GO:0007304	BP	GO:0007304	chorion-containing eggshell formation	0.0301082	0.71904	0.70964	Caur.EVM.10111-RA/Caur.EVM.34307-RA/Caur.EVM.34451-RA/Caur.EVM.13327-RA/Caur.EVM.37501-RA/Caur.EVM.12882-RA/Caur.EVM.25448-RA/Caur.EVM.37534-RA/Caur.EVM.14368-RA/Caur.EVM.04185-RA/Caur.EVM.02865-RA/Caur.EVM.36016-RA/Caur.EVM.28835-RA/Caur.EVM.06753-RA/Caur.EVM.03005-RA/Caur.EVM.08454-RA/Caur.EVM.26786-RA/Caur.EVM.10279-RA/Caur.EVM.09771-RA/Caur.EVM.21253-RA/Caur.EVM.08453-RA/Caur.EVM.05985-RA/Cau…	24
GO:0042698	BP	GO:0042698	ovulation cycle	0.0301082	0.71904	0.70964	Caur.EVM.10111-RA/Caur.EVM.30544-RA/Caur.EVM.34451-RA/Caur.EVM.03433-RA/Caur.EVM.13327-RA/Caur.EVM.22540-RA/Caur.EVM.19518-RA/Caur.EVM.30304-RA/Caur.EVM.19290-RA/Caur.EVM.12924-RA/Caur.EVM.27570-RA/Caur.EVM.00531-RA/Caur.EVM.34485-RA/Caur.EVM.23771-RA/Caur.EVM.35879-RA/Caur.EVM.21236-RA/Caur.EVM.38035-RA/Caur.EVM.07669-RA/Caur.EVM.06147-RA/Caur.EVM.18038-RA/Caur.EVM.16446-RA/Caur.EVM.32713-RA/Cau…	24
GO:0032355	BP	GO:0032355	response to estradiol	0.0302305	0.71904	0.70964	Caur.EVM.19653-RA/Caur.EVM.11833-RA/Caur.EVM.19518-RA/Caur.EVM.24395-RA/Caur.EVM.09691-RA/Caur.EVM.14240-RA/Caur.EVM.01210-RA/Caur.EVM.34493-RA/Caur.EVM.10945-RA/Caur.EVM.23770-RA/Caur.EVM.32363-RA/Caur.EVM.38035-RA/Caur.EVM.27096-RA/Caur.EVM.24118-RA/Caur.EVM.34853-RA/Caur.EVM.15846-RA/Caur.EVM.21260-RA/Caur.EVM.16446-RA/Caur.EVM.06634-RA/Caur.EVM.33688-RA/Caur.EVM.06146-RA/Caur.EVM.14071-RA/Cau…	34
GO:0045766	BP	GO:0045766	positive regulation of angiogenesis	0.0302305	0.71904	0.70964	Caur.EVM.36361-RA/Caur.EVM.24395-RA/Caur.EVM.08176-RA/Caur.EVM.23276-RA/Caur.EVM.20206-RA/Caur.EVM.18694-RA/Caur.EVM.28763-RA/Caur.EVM.23770-RA/Caur.EVM.24992-RA/Caur.EVM.34007-RA/Caur.EVM.11577-RA/Caur.EVM.10135-RA/Caur.EVM.13477-RA/Caur.EVM.27951-RA/Caur.EVM.18038-RA/Caur.EVM.22859-RA/Caur.EVM.06146-RA/Caur.EVM.25903-RA/Caur.EVM.08576-RA/Caur.EVM.30208-RA/Caur.EVM.26140-RA/Caur.EVM.25205-RA/Cau…	34
GO:1904018	BP	GO:1904018	positive regulation of vasculature development	0.0302305	0.71904	0.70964	Caur.EVM.36361-RA/Caur.EVM.24395-RA/Caur.EVM.08176-RA/Caur.EVM.23276-RA/Caur.EVM.20206-RA/Caur.EVM.18694-RA/Caur.EVM.28763-RA/Caur.EVM.23770-RA/Caur.EVM.24992-RA/Caur.EVM.34007-RA/Caur.EVM.11577-RA/Caur.EVM.10135-RA/Caur.EVM.13477-RA/Caur.EVM.27951-RA/Caur.EVM.18038-RA/Caur.EVM.22859-RA/Caur.EVM.06146-RA/Caur.EVM.25903-RA/Caur.EVM.08576-RA/Caur.EVM.30208-RA/Caur.EVM.26140-RA/Caur.EVM.25205-RA/Cau…	34
GO:0030098	BP	GO:0030098	lymphocyte differentiation	0.0307443	0.726803	0.717301	Caur.EVM.20606-RA/Caur.EVM.05445-RA/Caur.EVM.08217-RA/Caur.EVM.19653-RA/Caur.EVM.38296-RA/Caur.EVM.03649-RA/Caur.EVM.31233-RA/Caur.EVM.30559-RA/Caur.EVM.33019-RA/Caur.EVM.36979-RA/Caur.EVM.24145-RA/Caur.EVM.38120-RA/Caur.EVM.36568-RA/Caur.EVM.11805-RA/Caur.EVM.34714-RA/Caur.EVM.24201-RA/Caur.EVM.17264-RA/Caur.EVM.00572-RA/Caur.EVM.21878-RA/Caur.EVM.25379-RA/Caur.EVM.38295-RA/Caur.EVM.15819-RA/Cau…	78
GO:0060173	BP	GO:0060173	limb development	0.0315192	0.740605	0.730923	Caur.EVM.33870-RA/Caur.EVM.17389-RA/Caur.EVM.03732-RA/Caur.EVM.22754-RA/Caur.EVM.34451-RA/Caur.EVM.24536-RA/Caur.EVM.19767-RA/Caur.EVM.02865-RA/Caur.EVM.29335-RA/Caur.EVM.30408-RA/Caur.EVM.05077-RA/Caur.EVM.35562-RA/Caur.EVM.04378-RA/Caur.EVM.10087-RA/Caur.EVM.20624-RA/Caur.EVM.04724-RA/Caur.EVM.36547-RA/Caur.EVM.15760-RA/Caur.EVM.31556-RA/Caur.EVM.36693-RA/Caur.EVM.30195-RA/Caur.EVM.00049-RA/Cau…	72
GO:0043280	BP	GO:0043280	positive regulation of cysteine-type endopeptidase activity involved in apoptotic process	0.0322411	0.748496	0.738711	Caur.EVM.30598-RA/Caur.EVM.30544-RA/Caur.EVM.22540-RA/Caur.EVM.24395-RA/Caur.EVM.15566-RA/Caur.EVM.10995-RA/Caur.EVM.36113-RA/Caur.EVM.23490-RA/Caur.EVM.07776-RA/Caur.EVM.08247-RA/Caur.EVM.25235-RA/Caur.EVM.36979-RA/Caur.EVM.19189-RA/Caur.EVM.27475-RA/Caur.EVM.01522-RA/Caur.EVM.15994-RA/Caur.EVM.35947-RA/Caur.EVM.14240-RA/Caur.EVM.11856-RA/Caur.EVM.09543-RA/Caur.EVM.09640-RA/Caur.EVM.30195-RA/Cau…	54
GO:2001056	BP	GO:2001056	positive regulation of cysteine-type endopeptidase activity	0.0322411	0.748496	0.738711	Caur.EVM.30598-RA/Caur.EVM.30544-RA/Caur.EVM.22540-RA/Caur.EVM.24395-RA/Caur.EVM.15566-RA/Caur.EVM.10995-RA/Caur.EVM.36113-RA/Caur.EVM.23490-RA/Caur.EVM.07776-RA/Caur.EVM.08247-RA/Caur.EVM.25235-RA/Caur.EVM.36979-RA/Caur.EVM.19189-RA/Caur.EVM.27475-RA/Caur.EVM.01522-RA/Caur.EVM.15994-RA/Caur.EVM.35947-RA/Caur.EVM.14240-RA/Caur.EVM.11856-RA/Caur.EVM.09543-RA/Caur.EVM.09640-RA/Caur.EVM.30195-RA/Cau…	54
GO:1905114	BP	GO:1905114	cell surface receptor signaling pathway involved in cell-cell signaling	0.0337793	0.765045	0.755044	Caur.EVM.00956-RA/Caur.EVM.33870-RA/Caur.EVM.10111-RA/Caur.EVM.26232-RA/Caur.EVM.08217-RA/Caur.EVM.06722-RA/Caur.EVM.31909-RA/Caur.EVM.35270-RA/Caur.EVM.14703-RA/Caur.EVM.08459-RA/Caur.EVM.03315-RA/Caur.EVM.22754-RA/Caur.EVM.26557-RA/Caur.EVM.37837-RA/Caur.EVM.07496-RA/Caur.EVM.13327-RA/Caur.EVM.38532-RA/Caur.EVM.37937-RA/Caur.EVM.03232-RA/Caur.EVM.11833-RA/Caur.EVM.02913-RA/Caur.EVM.20466-RA/Cau…	200
GO:0030198	BP	GO:0030198	extracellular matrix organization	0.0338511	0.765045	0.755044	Caur.EVM.20226-RA/Caur.EVM.03732-RA/Caur.EVM.24334-RA/Caur.EVM.25992-RA/Caur.EVM.31360-RA/Caur.EVM.16241-RA/Caur.EVM.17945-RA/Caur.EVM.11110-RA/Caur.EVM.26600-RA/Caur.EVM.33878-RA/Caur.EVM.30304-RA/Caur.EVM.23034-RA/Caur.EVM.18310-RA/Caur.EVM.13245-RA/Caur.EVM.30722-RA/Caur.EVM.22945-RA/Caur.EVM.02633-RA/Caur.EVM.17083-RA/Caur.EVM.29335-RA/Caur.EVM.15234-RA/Caur.EVM.36351-RA/Caur.EVM.27475-RA/Cau…	99
GO:0033077	BP	GO:0033077	T cell differentiation in thymus	0.0338576	0.765045	0.755044	Caur.EVM.20606-RA/Caur.EVM.05445-RA/Caur.EVM.08217-RA/Caur.EVM.03649-RA/Caur.EVM.31233-RA/Caur.EVM.30559-RA/Caur.EVM.33019-RA/Caur.EVM.24145-RA/Caur.EVM.38120-RA/Caur.EVM.11805-RA/Caur.EVM.17264-RA/Caur.EVM.15819-RA/Caur.EVM.01504-RA/Caur.EVM.20245-RA/Caur.EVM.25283-RA/Caur.EVM.29103-RA/Caur.EVM.34827-RA/Caur.EVM.02241-RA/Caur.EVM.16446-RA/Caur.EVM.01526-RA/Caur.EVM.03654-RA/Caur.EVM.32799-RA/Cau…	27
GO:0001503	BP	GO:0001503	ossification	0.0346336	0.765045	0.755044	Caur.EVM.33870-RA/Caur.EVM.20226-RA/Caur.EVM.10111-RA/Caur.EVM.03732-RA/Caur.EVM.22754-RA/Caur.EVM.34451-RA/Caur.EVM.25992-RA/Caur.EVM.30709-RA/Caur.EVM.13327-RA/Caur.EVM.06565-RA/Caur.EVM.19767-RA/Caur.EVM.30304-RA/Caur.EVM.29310-RA/Caur.EVM.30386-RA/Caur.EVM.02865-RA/Caur.EVM.03451-RA/Caur.EVM.18952-RA/Caur.EVM.30722-RA/Caur.EVM.18137-RA/Caur.EVM.06738-RA/Caur.EVM.13041-RA/Caur.EVM.29335-RA/Cau…	96
GO:0014013	BP	GO:0014013	regulation of gliogenesis	0.0352935	0.765045	0.755044	Caur.EVM.10111-RA/Caur.EVM.13327-RA/Caur.EVM.23034-RA/Caur.EVM.21231-RA/Caur.EVM.36979-RA/Caur.EVM.18207-RA/Caur.EVM.17083-RA/Caur.EVM.20386-RA/Caur.EVM.34119-RA/Caur.EVM.19411-RA/Caur.EVM.15029-RA/Caur.EVM.33216-RA/Caur.EVM.29560-RA/Caur.EVM.35888-RA/Caur.EVM.32341-RA/Caur.EVM.14788-RA/Caur.EVM.01989-RA/Caur.EVM.09582-RA/Caur.EVM.17969-RA/Caur.EVM.17970-RA	20
GO:0055017	BP	GO:0055017	cardiac muscle tissue growth	0.0352935	0.765045	0.755044	Caur.EVM.20226-RA/Caur.EVM.04461-RA/Caur.EVM.25992-RA/Caur.EVM.30304-RA/Caur.EVM.13153-RA/Caur.EVM.34161-RA/Caur.EVM.33703-RA/Caur.EVM.34485-RA/Caur.EVM.24133-RA/Caur.EVM.04730-RA/Caur.EVM.13141-RA/Caur.EVM.33535-RA/Caur.EVM.34355-RA/Caur.EVM.04744-RA/Caur.EVM.01989-RA/Caur.EVM.09212-RA/Caur.EVM.31849-RA/Caur.EVM.04627-RA/Caur.EVM.22869-RA/Caur.EVM.05147-RA	20
GO:0010035	BP	GO:0010035	response to inorganic substance	0.0356153	0.765045	0.755044	Caur.EVM.26232-RA/Caur.EVM.14703-RA/Caur.EVM.01385-RA/Caur.EVM.07014-RA/Caur.EVM.34307-RA/Caur.EVM.17243-RA/Caur.EVM.38517-RA/Caur.EVM.11833-RA/Caur.EVM.29573-RA/Caur.EVM.24395-RA/Caur.EVM.24059-RA/Caur.EVM.22849-RA/Caur.EVM.29521-RA/Caur.EVM.16405-RA/Caur.EVM.37534-RA/Caur.EVM.17245-RA/Caur.EVM.03200-RA/Caur.EVM.26504-RA/Caur.EVM.26050-RA/Caur.EVM.11868-RA/Caur.EVM.36979-RA/Caur.EVM.17244-RA/Cau…	124
GO:0043062	BP	GO:0043062	extracellular structure organization	0.0364244	0.765045	0.755044	Caur.EVM.20226-RA/Caur.EVM.03732-RA/Caur.EVM.24334-RA/Caur.EVM.25992-RA/Caur.EVM.31360-RA/Caur.EVM.16241-RA/Caur.EVM.17945-RA/Caur.EVM.11110-RA/Caur.EVM.26600-RA/Caur.EVM.07142-RA/Caur.EVM.33878-RA/Caur.EVM.30304-RA/Caur.EVM.15919-RA/Caur.EVM.23034-RA/Caur.EVM.18310-RA/Caur.EVM.13245-RA/Caur.EVM.30722-RA/Caur.EVM.22945-RA/Caur.EVM.02633-RA/Caur.EVM.17083-RA/Caur.EVM.29335-RA/Caur.EVM.15234-RA/Cau…	107
GO:0030001	BP	GO:0030001	metal ion transport	0.0370129	0.765045	0.755044	Caur.EVM.35230-RA/Caur.EVM.06479-RA/Caur.EVM.15019-RA/Caur.EVM.19575-RA/Caur.EVM.05455-RA/Caur.EVM.19925-RA/Caur.EVM.15528-RA/Caur.EVM.02978-RA/Caur.EVM.34322-RA/Caur.EVM.04463-RA/Caur.EVM.38821-RA/Caur.EVM.21117-RA/Caur.EVM.24335-RA/Caur.EVM.11447-RA/Caur.EVM.17192-RA/Caur.EVM.31537-RA/Caur.EVM.14898-RA/Caur.EVM.16220-RA/Caur.EVM.02968-RA/Caur.EVM.14597-RA/Caur.EVM.13245-RA/Caur.EVM.13296-RA/Cau…	214
GO:0031348	BP	GO:0031348	negative regulation of defense response	0.0371413	0.765045	0.755044	Caur.EVM.30598-RA/Caur.EVM.26369-RA/Caur.EVM.08176-RA/Caur.EVM.34903-RA/Caur.EVM.01522-RA/Caur.EVM.16712-RA/Caur.EVM.30558-RA/Caur.EVM.24201-RA/Caur.EVM.09543-RA/Caur.EVM.31212-RA/Caur.EVM.00834-RA/Caur.EVM.01523-RA/Caur.EVM.30667-RA/Caur.EVM.12292-RA/Caur.EVM.07851-RA/Caur.EVM.24953-RA/Caur.EVM.22255-RA/Caur.EVM.15849-RA/Caur.EVM.31210-RA/Caur.EVM.30863-RA/Caur.EVM.01529-RA/Caur.EVM.34151-RA/Cau…	25
GO:0007194	BP	GO:0007194	negative regulation of adenylate cyclase activity	0.0379281	0.765045	0.755044	Caur.EVM.06479-RA/Caur.EVM.01273-RA/Caur.EVM.18258-RA/Caur.EVM.06738-RA/Caur.EVM.33713-RA/Caur.EVM.24816-RA/Caur.EVM.37904-RA/Caur.EVM.00670-RA/Caur.EVM.05565-RA/Caur.EVM.20123-RA/Caur.EVM.00266-RA/Caur.EVM.09241-RA/Caur.EVM.37779-RA/Caur.EVM.26888-RA/Caur.EVM.15736-RA/Caur.EVM.35310-RA/Caur.EVM.32631-RA/Caur.EVM.09941-RA	18
GO:0030809	BP	GO:0030809	negative regulation of nucleotide biosynthetic process	0.0379281	0.765045	0.755044	Caur.EVM.06479-RA/Caur.EVM.01273-RA/Caur.EVM.18258-RA/Caur.EVM.06738-RA/Caur.EVM.33713-RA/Caur.EVM.24816-RA/Caur.EVM.37904-RA/Caur.EVM.00670-RA/Caur.EVM.05565-RA/Caur.EVM.20123-RA/Caur.EVM.00266-RA/Caur.EVM.09241-RA/Caur.EVM.37779-RA/Caur.EVM.26888-RA/Caur.EVM.15736-RA/Caur.EVM.35310-RA/Caur.EVM.32631-RA/Caur.EVM.09941-RA	18
GO:0031280	BP	GO:0031280	negative regulation of cyclase activity	0.0379281	0.765045	0.755044	Caur.EVM.06479-RA/Caur.EVM.01273-RA/Caur.EVM.18258-RA/Caur.EVM.06738-RA/Caur.EVM.33713-RA/Caur.EVM.24816-RA/Caur.EVM.37904-RA/Caur.EVM.00670-RA/Caur.EVM.05565-RA/Caur.EVM.20123-RA/Caur.EVM.00266-RA/Caur.EVM.09241-RA/Caur.EVM.37779-RA/Caur.EVM.26888-RA/Caur.EVM.15736-RA/Caur.EVM.35310-RA/Caur.EVM.32631-RA/Caur.EVM.09941-RA	18
GO:0045980	BP	GO:0045980	negative regulation of nucleotide metabolic process	0.0379281	0.765045	0.755044	Caur.EVM.06479-RA/Caur.EVM.01273-RA/Caur.EVM.18258-RA/Caur.EVM.06738-RA/Caur.EVM.33713-RA/Caur.EVM.24816-RA/Caur.EVM.37904-RA/Caur.EVM.00670-RA/Caur.EVM.05565-RA/Caur.EVM.20123-RA/Caur.EVM.00266-RA/Caur.EVM.09241-RA/Caur.EVM.37779-RA/Caur.EVM.26888-RA/Caur.EVM.15736-RA/Caur.EVM.35310-RA/Caur.EVM.32631-RA/Caur.EVM.09941-RA	18
GO:0048636	BP	GO:0048636	positive regulation of muscle organ development	0.0379281	0.765045	0.755044	Caur.EVM.10111-RA/Caur.EVM.34451-RA/Caur.EVM.13327-RA/Caur.EVM.02865-RA/Caur.EVM.34161-RA/Caur.EVM.33703-RA/Caur.EVM.37388-RA/Caur.EVM.30195-RA/Caur.EVM.24133-RA/Caur.EVM.11254-RA/Caur.EVM.27096-RA/Caur.EVM.34355-RA/Caur.EVM.36294-RA/Caur.EVM.09212-RA/Caur.EVM.29862-RA/Caur.EVM.04627-RA/Caur.EVM.38342-RA/Caur.EVM.05147-RA	18
GO:0051350	BP	GO:0051350	negative regulation of lyase activity	0.0379281	0.765045	0.755044	Caur.EVM.06479-RA/Caur.EVM.01273-RA/Caur.EVM.18258-RA/Caur.EVM.06738-RA/Caur.EVM.33713-RA/Caur.EVM.24816-RA/Caur.EVM.37904-RA/Caur.EVM.00670-RA/Caur.EVM.05565-RA/Caur.EVM.20123-RA/Caur.EVM.00266-RA/Caur.EVM.09241-RA/Caur.EVM.37779-RA/Caur.EVM.26888-RA/Caur.EVM.15736-RA/Caur.EVM.35310-RA/Caur.EVM.32631-RA/Caur.EVM.09941-RA	18
GO:0071300	BP	GO:0071300	cellular response to retinoic acid	0.0379281	0.765045	0.755044	Caur.EVM.19653-RA/Caur.EVM.08596-RA/Caur.EVM.03585-RA/Caur.EVM.13153-RA/Caur.EVM.35417-RA/Caur.EVM.33703-RA/Caur.EVM.30195-RA/Caur.EVM.04730-RA/Caur.EVM.10135-RA/Caur.EVM.04714-RA/Caur.EVM.34355-RA/Caur.EVM.21260-RA/Caur.EVM.30144-RA/Caur.EVM.14071-RA/Caur.EVM.14045-RA/Caur.EVM.30208-RA/Caur.EVM.13304-RA/Caur.EVM.32863-RA	18
GO:1900372	BP	GO:1900372	negative regulation of purine nucleotide biosynthetic process	0.0379281	0.765045	0.755044	Caur.EVM.06479-RA/Caur.EVM.01273-RA/Caur.EVM.18258-RA/Caur.EVM.06738-RA/Caur.EVM.33713-RA/Caur.EVM.24816-RA/Caur.EVM.37904-RA/Caur.EVM.00670-RA/Caur.EVM.05565-RA/Caur.EVM.20123-RA/Caur.EVM.00266-RA/Caur.EVM.09241-RA/Caur.EVM.37779-RA/Caur.EVM.26888-RA/Caur.EVM.15736-RA/Caur.EVM.35310-RA/Caur.EVM.32631-RA/Caur.EVM.09941-RA	18
GO:1900543	BP	GO:1900543	negative regulation of purine nucleotide metabolic process	0.0379281	0.765045	0.755044	Caur.EVM.06479-RA/Caur.EVM.01273-RA/Caur.EVM.18258-RA/Caur.EVM.06738-RA/Caur.EVM.33713-RA/Caur.EVM.24816-RA/Caur.EVM.37904-RA/Caur.EVM.00670-RA/Caur.EVM.05565-RA/Caur.EVM.20123-RA/Caur.EVM.00266-RA/Caur.EVM.09241-RA/Caur.EVM.37779-RA/Caur.EVM.26888-RA/Caur.EVM.15736-RA/Caur.EVM.35310-RA/Caur.EVM.32631-RA/Caur.EVM.09941-RA	18
GO:0043542	BP	GO:0043542	endothelial cell migration	0.0385592	0.765045	0.755044	Caur.EVM.06565-RA/Caur.EVM.11833-RA/Caur.EVM.29310-RA/Caur.EVM.37417-RA/Caur.EVM.30386-RA/Caur.EVM.05206-RA/Caur.EVM.33743-RA/Caur.EVM.08176-RA/Caur.EVM.14230-RA/Caur.EVM.16485-RA/Caur.EVM.20522-RA/Caur.EVM.18694-RA/Caur.EVM.06868-RA/Caur.EVM.08228-RA/Caur.EVM.33001-RA/Caur.EVM.30278-RA/Caur.EVM.35638-RA/Caur.EVM.33645-RA/Caur.EVM.23770-RA/Caur.EVM.11577-RA/Caur.EVM.01702-RA/Caur.EVM.00189-RA/Cau…	44
GO:0050769	BP	GO:0050769	positive regulation of neurogenesis	0.0392757	0.765045	0.755044	Caur.EVM.10111-RA/Caur.EVM.19653-RA/Caur.EVM.13327-RA/Caur.EVM.37937-RA/Caur.EVM.23034-RA/Caur.EVM.30559-RA/Caur.EVM.18355-RA/Caur.EVM.36979-RA/Caur.EVM.18207-RA/Caur.EVM.00179-RA/Caur.EVM.18137-RA/Caur.EVM.17083-RA/Caur.EVM.01389-RA/Caur.EVM.09965-RA/Caur.EVM.17769-RA/Caur.EVM.20386-RA/Caur.EVM.38367-RA/Caur.EVM.34119-RA/Caur.EVM.19411-RA/Caur.EVM.33713-RA/Caur.EVM.33703-RA/Caur.EVM.29607-RA/Cau…	98
GO:0010952	BP	GO:0010952	positive regulation of peptidase activity	0.0393603	0.765045	0.755044	Caur.EVM.30598-RA/Caur.EVM.30544-RA/Caur.EVM.22540-RA/Caur.EVM.24395-RA/Caur.EVM.15566-RA/Caur.EVM.10995-RA/Caur.EVM.36113-RA/Caur.EVM.23490-RA/Caur.EVM.07776-RA/Caur.EVM.08247-RA/Caur.EVM.25235-RA/Caur.EVM.36979-RA/Caur.EVM.19189-RA/Caur.EVM.27475-RA/Caur.EVM.01522-RA/Caur.EVM.15994-RA/Caur.EVM.35947-RA/Caur.EVM.14240-RA/Caur.EVM.11856-RA/Caur.EVM.09543-RA/Caur.EVM.09640-RA/Caur.EVM.30195-RA/Cau…	56
GO:0048863	BP	GO:0048863	stem cell differentiation	0.0402104	0.765045	0.755044	Caur.EVM.33870-RA/Caur.EVM.20226-RA/Caur.EVM.10111-RA/Caur.EVM.36361-RA/Caur.EVM.17389-RA/Caur.EVM.05474-RA/Caur.EVM.08597-RA/Caur.EVM.19688-RA/Caur.EVM.02581-RA/Caur.EVM.22754-RA/Caur.EVM.34451-RA/Caur.EVM.07496-RA/Caur.EVM.25992-RA/Caur.EVM.10528-RA/Caur.EVM.13327-RA/Caur.EVM.22498-RA/Caur.EVM.06565-RA/Caur.EVM.14638-RA/Caur.EVM.17220-RA/Caur.EVM.27892-RA/Caur.EVM.11071-RA/Caur.EVM.15199-RA/Cau…	197
GO:0007419	BP	GO:0007419	ventral cord development	0.0404247	0.765045	0.755044	Caur.EVM.17832-RA/Caur.EVM.36016-RA/Caur.EVM.13852-RA/Caur.EVM.00049-RA/Caur.EVM.10120-RA/Caur.EVM.04664-RA/Caur.EVM.05742-RA/Caur.EVM.39035-RA/Caur.EVM.13212-RA/Caur.EVM.20570-RA/Caur.EVM.24891-RA/Caur.EVM.36501-RA/Caur.EVM.14373-RA/Caur.EVM.28468-RA/Caur.EVM.13315-RA/Caur.EVM.13853-RA	16
GO:0021538	BP	GO:0021538	epithalamus development	0.0404247	0.765045	0.755044	Caur.EVM.19614-RA/Caur.EVM.36319-RA/Caur.EVM.20787-RA/Caur.EVM.19076-RA/Caur.EVM.27171-RA/Caur.EVM.09557-RA/Caur.EVM.25513-RA/Caur.EVM.24133-RA/Caur.EVM.32232-RA/Caur.EVM.12484-RA/Caur.EVM.09212-RA/Caur.EVM.14226-RA/Caur.EVM.23596-RA/Caur.EVM.10383-RA/Caur.EVM.37754-RA/Caur.EVM.30382-RA	16
GO:0046148	BP	GO:0046148	pigment biosynthetic process	0.0404247	0.765045	0.755044	Caur.EVM.19739-RA/Caur.EVM.30953-RA/Caur.EVM.38877-RA/Caur.EVM.07976-RA/Caur.EVM.39256-RA/Caur.EVM.10945-RA/Caur.EVM.17228-RA/Caur.EVM.29957-RA/Caur.EVM.29143-RA/Caur.EVM.12823-RA/Caur.EVM.35626-RA/Caur.EVM.03751-RA/Caur.EVM.07422-RA/Caur.EVM.19350-RA/Caur.EVM.29095-RA/Caur.EVM.30184-RA	16
GO:0046688	BP	GO:0046688	response to copper ion	0.0404247	0.765045	0.755044	Caur.EVM.07014-RA/Caur.EVM.22849-RA/Caur.EVM.16405-RA/Caur.EVM.11868-RA/Caur.EVM.36983-RA/Caur.EVM.30601-RA/Caur.EVM.11350-RA/Caur.EVM.20470-RA/Caur.EVM.24125-RA/Caur.EVM.24388-RA/Caur.EVM.33181-RA/Caur.EVM.36596-RA/Caur.EVM.28243-RA/Caur.EVM.30208-RA/Caur.EVM.20886-RA/Caur.EVM.19590-RA	16
GO:0048319	BP	GO:0048319	axial mesoderm morphogenesis	0.0404247	0.765045	0.755044	Caur.EVM.06565-RA/Caur.EVM.12612-RA/Caur.EVM.29310-RA/Caur.EVM.21776-RA/Caur.EVM.12405-RA/Caur.EVM.14748-RA/Caur.EVM.08742-RA/Caur.EVM.16445-RA/Caur.EVM.11978-RA/Caur.EVM.36107-RA/Caur.EVM.27030-RA/Caur.EVM.08348-RA/Caur.EVM.21251-RA/Caur.EVM.09058-RA/Caur.EVM.17435-RA/Caur.EVM.33349-RA	16
GO:0050764	BP	GO:0050764	regulation of phagocytosis	0.0404247	0.765045	0.755044	Caur.EVM.36361-RA/Caur.EVM.11833-RA/Caur.EVM.02494-RA/Caur.EVM.36016-RA/Caur.EVM.39018-RA/Caur.EVM.30547-RA/Caur.EVM.18123-RA/Caur.EVM.10410-RA/Caur.EVM.35610-RA/Caur.EVM.36482-RA/Caur.EVM.34853-RA/Caur.EVM.15846-RA/Caur.EVM.02254-RA/Caur.EVM.19363-RA/Caur.EVM.19579-RA/Caur.EVM.16693-RA	16
GO:0030282	BP	GO:0030282	bone mineralization	0.0406471	0.765045	0.755044	Caur.EVM.10111-RA/Caur.EVM.34451-RA/Caur.EVM.13327-RA/Caur.EVM.30386-RA/Caur.EVM.02865-RA/Caur.EVM.14230-RA/Caur.EVM.02580-RA/Caur.EVM.09317-RA/Caur.EVM.17694-RA/Caur.EVM.05194-RA/Caur.EVM.11491-RA/Caur.EVM.33703-RA/Caur.EVM.35656-RA/Caur.EVM.28763-RA/Caur.EVM.23770-RA/Caur.EVM.04720-RA/Caur.EVM.13160-RA/Caur.EVM.10135-RA/Caur.EVM.27096-RA/Caur.EVM.19733-RA/Caur.EVM.24034-RA/Caur.EVM.04467-RA/Cau…	36
GO:0010717	BP	GO:0010717	regulation of epithelial to mesenchymal transition	0.0407035	0.765045	0.755044	Caur.EVM.10111-RA/Caur.EVM.07496-RA/Caur.EVM.13327-RA/Caur.EVM.06565-RA/Caur.EVM.29310-RA/Caur.EVM.10205-RA/Caur.EVM.36943-RA/Caur.EVM.37167-RA/Caur.EVM.05380-RA/Caur.EVM.12118-RA/Caur.EVM.11553-RA/Caur.EVM.20386-RA/Caur.EVM.15460-RA/Caur.EVM.23823-RA/Caur.EVM.06188-RA/Caur.EVM.04714-RA/Caur.EVM.34853-RA/Caur.EVM.30144-RA/Caur.EVM.19106-RA/Caur.EVM.37663-RA/Caur.EVM.15155-RA/Caur.EVM.32863-RA/Cau…	23
GO:0006813	BP	GO:0006813	potassium ion transport	0.0421485	0.765045	0.755044	Caur.EVM.24335-RA/Caur.EVM.13245-RA/Caur.EVM.01094-RA/Caur.EVM.18043-RA/Caur.EVM.33136-RA/Caur.EVM.15340-RA/Caur.EVM.24256-RA/Caur.EVM.13523-RA/Caur.EVM.04186-RA/Caur.EVM.28599-RA/Caur.EVM.16248-RA/Caur.EVM.24790-RA/Caur.EVM.13845-RA/Caur.EVM.33639-RA/Caur.EVM.07586-RA/Caur.EVM.31138-RA/Caur.EVM.18478-RA/Caur.EVM.30001-RA/Caur.EVM.04115-RA/Caur.EVM.35255-RA/Caur.EVM.05090-RA/Caur.EVM.10135-RA/Cau…	79
GO:0000122	BP	GO:0000122	negative regulation of transcription by RNA polymerase II	0.0424258	0.765045	0.755044	Caur.EVM.00790-RA/Caur.EVM.33870-RA/Caur.EVM.10111-RA/Caur.EVM.36361-RA/Caur.EVM.05474-RA/Caur.EVM.19653-RA/Caur.EVM.08597-RA/Caur.EVM.02045-RA/Caur.EVM.30544-RA/Caur.EVM.34307-RA/Caur.EVM.02581-RA/Caur.EVM.22754-RA/Caur.EVM.13327-RA/Caur.EVM.26955-RA/Caur.EVM.22540-RA/Caur.EVM.22498-RA/Caur.EVM.33474-RA/Caur.EVM.37534-RA/Caur.EVM.33568-RA/Caur.EVM.01171-RA/Caur.EVM.36319-RA/Caur.EVM.30304-RA/Cau…	153
GO:0072001	BP	GO:0072001	renal system development	0.0424258	0.765045	0.755044	Caur.EVM.33870-RA/Caur.EVM.20226-RA/Caur.EVM.10111-RA/Caur.EVM.17389-RA/Caur.EVM.01167-RA/Caur.EVM.19653-RA/Caur.EVM.22754-RA/Caur.EVM.34451-RA/Caur.EVM.25992-RA/Caur.EVM.02978-RA/Caur.EVM.13327-RA/Caur.EVM.16241-RA/Caur.EVM.03649-RA/Caur.EVM.33564-RA/Caur.EVM.00886-RA/Caur.EVM.00056-RA/Caur.EVM.21302-RA/Caur.EVM.30304-RA/Caur.EVM.30559-RA/Caur.EVM.00852-RA/Caur.EVM.08247-RA/Caur.EVM.36979-RA/Cau…	153
GO:0006081	BP	GO:0006081	cellular aldehyde metabolic process	0.0425349	0.765045	0.755044	Caur.EVM.10111-RA/Caur.EVM.17389-RA/Caur.EVM.13327-RA/Caur.EVM.20362-RA/Caur.EVM.02072-RA/Caur.EVM.16518-RA/Caur.EVM.08219-RA/Caur.EVM.33301-RA/Caur.EVM.17503-RA/Caur.EVM.15443-RA/Caur.EVM.31285-RA/Caur.EVM.25521-RA/Caur.EVM.26890-RA/Caur.EVM.13328-RA	14
GO:0006582	BP	GO:0006582	melanin metabolic process	0.0425349	0.765045	0.755044	Caur.EVM.06565-RA/Caur.EVM.11833-RA/Caur.EVM.29310-RA/Caur.EVM.30953-RA/Caur.EVM.04218-RA/Caur.EVM.14480-RA/Caur.EVM.36016-RA/Caur.EVM.20386-RA/Caur.EVM.35687-RA/Caur.EVM.37285-RA/Caur.EVM.15846-RA/Caur.EVM.15155-RA/Caur.EVM.26359-RA/Caur.EVM.19780-RA	14
GO:0015669	BP	GO:0015669	gas transport	0.0425349	0.765045	0.755044	Caur.EVM.21737-RA/Caur.EVM.21738-RA/Caur.EVM.10554-RA/Caur.EVM.08247-RA/Caur.EVM.10553-RA/Caur.EVM.15110-RA/Caur.EVM.17404-RA/Caur.EVM.21736-RA/Caur.EVM.01975-RA/Caur.EVM.30208-RA/Caur.EVM.15822-RA/Caur.EVM.30209-RA/Caur.EVM.03363-RA/Caur.EVM.21745-RA	14
GO:0030850	BP	GO:0030850	prostate gland development	0.0425349	0.765045	0.755044	Caur.EVM.33870-RA/Caur.EVM.19653-RA/Caur.EVM.22754-RA/Caur.EVM.13816-RA/Caur.EVM.11833-RA/Caur.EVM.25812-RA/Caur.EVM.27096-RA/Caur.EVM.25283-RA/Caur.EVM.15846-RA/Caur.EVM.16446-RA/Caur.EVM.01989-RA/Caur.EVM.14071-RA/Caur.EVM.32799-RA/Caur.EVM.38342-RA	14
GO:0051279	BP	GO:0051279	regulation of release of sequestered calcium ion into cytosol	0.0425349	0.765045	0.755044	Caur.EVM.17192-RA/Caur.EVM.14597-RA/Caur.EVM.13589-RA/Caur.EVM.08680-RA/Caur.EVM.14849-RA/Caur.EVM.10135-RA/Caur.EVM.34853-RA/Caur.EVM.33407-RA/Caur.EVM.14880-RA/Caur.EVM.25096-RA/Caur.EVM.27868-RA/Caur.EVM.07153-RA/Caur.EVM.09638-RA/Caur.EVM.13304-RA	14
GO:1905207	BP	GO:1905207	regulation of cardiocyte differentiation	0.0425349	0.765045	0.755044	Caur.EVM.33870-RA/Caur.EVM.10111-RA/Caur.EVM.22754-RA/Caur.EVM.13327-RA/Caur.EVM.02494-RA/Caur.EVM.33703-RA/Caur.EVM.18123-RA/Caur.EVM.30195-RA/Caur.EVM.32869-RA/Caur.EVM.13141-RA/Caur.EVM.03744-RA/Caur.EVM.34355-RA/Caur.EVM.05257-RA/Caur.EVM.04744-RA	14
GO:0006029	BP	GO:0006029	proteoglycan metabolic process	0.0426749	0.765045	0.755044	Caur.EVM.10111-RA/Caur.EVM.03732-RA/Caur.EVM.16737-RA/Caur.EVM.13327-RA/Caur.EVM.26600-RA/Caur.EVM.36164-RA/Caur.EVM.30324-RA/Caur.EVM.30722-RA/Caur.EVM.22945-RA/Caur.EVM.29335-RA/Caur.EVM.00245-RA/Caur.EVM.29588-RA/Caur.EVM.22891-RA/Caur.EVM.33848-RA/Caur.EVM.37985-RA/Caur.EVM.34266-RA/Caur.EVM.19188-RA/Caur.EVM.29100-RA/Caur.EVM.14698-RA/Caur.EVM.08832-RA/Caur.EVM.29685-RA/Caur.EVM.18155-RA/Cau…	42
GO:0016055	BP	GO:0016055	Wnt signaling pathway	0.0427908	0.765045	0.755044	Caur.EVM.00956-RA/Caur.EVM.33870-RA/Caur.EVM.10111-RA/Caur.EVM.26232-RA/Caur.EVM.08217-RA/Caur.EVM.06722-RA/Caur.EVM.31909-RA/Caur.EVM.35270-RA/Caur.EVM.14703-RA/Caur.EVM.08459-RA/Caur.EVM.03315-RA/Caur.EVM.22754-RA/Caur.EVM.26557-RA/Caur.EVM.37837-RA/Caur.EVM.07496-RA/Caur.EVM.13327-RA/Caur.EVM.38532-RA/Caur.EVM.37937-RA/Caur.EVM.03232-RA/Caur.EVM.11833-RA/Caur.EVM.02913-RA/Caur.EVM.20466-RA/Cau…	191
GO:0001759	BP	GO:0001759	organ induction	0.043384	0.765045	0.755044	Caur.EVM.33870-RA/Caur.EVM.10111-RA/Caur.EVM.22754-RA/Caur.EVM.13327-RA/Caur.EVM.30195-RA/Caur.EVM.32869-RA/Caur.EVM.05257-RA/Caur.EVM.05147-RA/Caur.EVM.36248-RA/Caur.EVM.28758-RA	10
GO:0022010	BP	GO:0022010	central nervous system myelination	0.043384	0.765045	0.755044	Caur.EVM.11833-RA/Caur.EVM.00886-RA/Caur.EVM.23034-RA/Caur.EVM.17083-RA/Caur.EVM.19411-RA/Caur.EVM.38793-RA/Caur.EVM.15846-RA/Caur.EVM.11978-RA/Caur.EVM.17969-RA/Caur.EVM.17970-RA	10
GO:0032291	BP	GO:0032291	axon ensheathment in central nervous system	0.043384	0.765045	0.755044	Caur.EVM.11833-RA/Caur.EVM.00886-RA/Caur.EVM.23034-RA/Caur.EVM.17083-RA/Caur.EVM.19411-RA/Caur.EVM.38793-RA/Caur.EVM.15846-RA/Caur.EVM.11978-RA/Caur.EVM.17969-RA/Caur.EVM.17970-RA	10
GO:0045058	BP	GO:0045058	T cell selection	0.043384	0.765045	0.755044	Caur.EVM.20606-RA/Caur.EVM.05445-RA/Caur.EVM.38120-RA/Caur.EVM.38212-RA/Caur.EVM.38968-RA/Caur.EVM.03946-RA/Caur.EVM.29622-RA/Caur.EVM.20038-RA/Caur.EVM.08831-RA/Caur.EVM.12431-RA	10
GO:0055021	BP	GO:0055021	regulation of cardiac muscle tissue growth	0.043384	0.765045	0.755044	Caur.EVM.34161-RA/Caur.EVM.33703-RA/Caur.EVM.24133-RA/Caur.EVM.13141-RA/Caur.EVM.34355-RA/Caur.EVM.04744-RA/Caur.EVM.01989-RA/Caur.EVM.09212-RA/Caur.EVM.04627-RA/Caur.EVM.05147-RA	10
GO:0061437	BP	GO:0061437	renal system vasculature development	0.043384	0.765045	0.755044	Caur.EVM.08176-RA/Caur.EVM.21563-RA/Caur.EVM.01955-RA/Caur.EVM.27096-RA/Caur.EVM.30208-RA/Caur.EVM.38342-RA/Caur.EVM.38436-RA/Caur.EVM.34649-RA/Caur.EVM.30903-RA/Caur.EVM.08656-RA	10
GO:0061440	BP	GO:0061440	kidney vasculature development	0.043384	0.765045	0.755044	Caur.EVM.08176-RA/Caur.EVM.21563-RA/Caur.EVM.01955-RA/Caur.EVM.27096-RA/Caur.EVM.30208-RA/Caur.EVM.38342-RA/Caur.EVM.38436-RA/Caur.EVM.34649-RA/Caur.EVM.30903-RA/Caur.EVM.08656-RA	10
GO:0072012	BP	GO:0072012	glomerulus vasculature development	0.043384	0.765045	0.755044	Caur.EVM.08176-RA/Caur.EVM.21563-RA/Caur.EVM.01955-RA/Caur.EVM.27096-RA/Caur.EVM.30208-RA/Caur.EVM.38342-RA/Caur.EVM.38436-RA/Caur.EVM.34649-RA/Caur.EVM.30903-RA/Caur.EVM.08656-RA	10
GO:0043627	BP	GO:0043627	response to estrogen	0.043467	0.765045	0.755044	Caur.EVM.33870-RA/Caur.EVM.19653-RA/Caur.EVM.02581-RA/Caur.EVM.22754-RA/Caur.EVM.38296-RA/Caur.EVM.22498-RA/Caur.EVM.11833-RA/Caur.EVM.19518-RA/Caur.EVM.24395-RA/Caur.EVM.08176-RA/Caur.EVM.09691-RA/Caur.EVM.14240-RA/Caur.EVM.15340-RA/Caur.EVM.01210-RA/Caur.EVM.00531-RA/Caur.EVM.38295-RA/Caur.EVM.28763-RA/Caur.EVM.34493-RA/Caur.EVM.10945-RA/Caur.EVM.23770-RA/Caur.EVM.32363-RA/Caur.EVM.15110-RA/Cau…	48
GO:0003188	BP	GO:0003188	heart valve formation	0.0438071	0.765045	0.755044	Caur.EVM.36361-RA/Caur.EVM.11020-RA/Caur.EVM.36338-RA/Caur.EVM.00245-RA/Caur.EVM.27117-RA/Caur.EVM.15209-RA/Caur.EVM.11078-RA/Caur.EVM.01882-RA/Caur.EVM.31936-RA/Caur.EVM.38361-RA/Caur.EVM.20038-RA/Caur.EVM.19579-RA	12
GO:0039019	BP	GO:0039019	pronephric nephron development	0.0438071	0.765045	0.755044	Caur.EVM.01167-RA/Caur.EVM.16241-RA/Caur.EVM.33564-RA/Caur.EVM.30304-RA/Caur.EVM.34485-RA/Caur.EVM.33956-RA/Caur.EVM.35950-RA/Caur.EVM.02290-RA/Caur.EVM.26798-RA/Caur.EVM.19783-RA/Caur.EVM.02070-RA/Caur.EVM.26361-RA	12
GO:0045933	BP	GO:0045933	positive regulation of muscle contraction	0.0438071	0.765045	0.755044	Caur.EVM.38296-RA/Caur.EVM.33713-RA/Caur.EVM.39018-RA/Caur.EVM.38295-RA/Caur.EVM.23770-RA/Caur.EVM.36482-RA/Caur.EVM.01684-RA/Caur.EVM.33688-RA/Caur.EVM.06146-RA/Caur.EVM.25096-RA/Caur.EVM.25420-RA/Caur.EVM.17242-RA	12
GO:0060135	BP	GO:0060135	maternal process involved in female pregnancy	0.0438071	0.765045	0.755044	Caur.EVM.02581-RA/Caur.EVM.22498-RA/Caur.EVM.11045-RA/Caur.EVM.13153-RA/Caur.EVM.28086-RA/Caur.EVM.28763-RA/Caur.EVM.04730-RA/Caur.EVM.23770-RA/Caur.EVM.33717-RA/Caur.EVM.06146-RA/Caur.EVM.34340-RA/Caur.EVM.26814-RA	12
GO:0043065	BP	GO:0043065	positive regulation of apoptotic process	0.0447757	0.777683	0.767516	Caur.EVM.10111-RA/Caur.EVM.30598-RA/Caur.EVM.30544-RA/Caur.EVM.27603-RA/Caur.EVM.11043-RA/Caur.EVM.07496-RA/Caur.EVM.33606-RA/Caur.EVM.38517-RA/Caur.EVM.13327-RA/Caur.EVM.22540-RA/Caur.EVM.11833-RA/Caur.EVM.24395-RA/Caur.EVM.04013-RA/Caur.EVM.15566-RA/Caur.EVM.10995-RA/Caur.EVM.36113-RA/Caur.EVM.30114-RA/Caur.EVM.14239-RA/Caur.EVM.04675-RA/Caur.EVM.23490-RA/Caur.EVM.07776-RA/Caur.EVM.08247-RA/Cau…	158
GO:0008585	BP	GO:0008585	female gonad development	0.0450208	0.777683	0.767516	Caur.EVM.30544-RA/Caur.EVM.34451-RA/Caur.EVM.22540-RA/Caur.EVM.19518-RA/Caur.EVM.11110-RA/Caur.EVM.30304-RA/Caur.EVM.23034-RA/Caur.EVM.19290-RA/Caur.EVM.12924-RA/Caur.EVM.33019-RA/Caur.EVM.27570-RA/Caur.EVM.17083-RA/Caur.EVM.15234-RA/Caur.EVM.16518-RA/Caur.EVM.08219-RA/Caur.EVM.17531-RA/Caur.EVM.05194-RA/Caur.EVM.34485-RA/Caur.EVM.35656-RA/Caur.EVM.01504-RA/Caur.EVM.23771-RA/Caur.EVM.35879-RA/Cau…	34
GO:0010558	BP	GO:0010558	negative regulation of macromolecule biosynthetic process	0.0451325	0.777683	0.767516	Caur.EVM.00790-RA/Caur.EVM.33870-RA/Caur.EVM.10111-RA/Caur.EVM.36361-RA/Caur.EVM.30598-RA/Caur.EVM.05474-RA/Caur.EVM.19653-RA/Caur.EVM.08597-RA/Caur.EVM.02045-RA/Caur.EVM.30544-RA/Caur.EVM.34307-RA/Caur.EVM.02581-RA/Caur.EVM.11043-RA/Caur.EVM.22754-RA/Caur.EVM.26873-RA/Caur.EVM.13327-RA/Caur.EVM.26955-RA/Caur.EVM.22540-RA/Caur.EVM.22498-RA/Caur.EVM.27741-RA/Caur.EVM.24709-RA/Caur.EVM.12882-RA/Cau…	280
GO:2000113	BP	GO:2000113	negative regulation of cellular macromolecule biosynthetic process	0.0453999	0.778829	0.768648	Caur.EVM.00790-RA/Caur.EVM.33870-RA/Caur.EVM.10111-RA/Caur.EVM.36361-RA/Caur.EVM.05474-RA/Caur.EVM.19653-RA/Caur.EVM.08597-RA/Caur.EVM.02045-RA/Caur.EVM.30544-RA/Caur.EVM.34307-RA/Caur.EVM.02581-RA/Caur.EVM.11043-RA/Caur.EVM.22754-RA/Caur.EVM.26873-RA/Caur.EVM.13327-RA/Caur.EVM.26955-RA/Caur.EVM.22540-RA/Caur.EVM.22498-RA/Caur.EVM.27741-RA/Caur.EVM.24709-RA/Caur.EVM.12882-RA/Caur.EVM.33474-RA/Cau…	268
GO:0021536	BP	GO:0021536	diencephalon development	0.0460833	0.782827	0.772593	Caur.EVM.10111-RA/Caur.EVM.36361-RA/Caur.EVM.04461-RA/Caur.EVM.19614-RA/Caur.EVM.13327-RA/Caur.EVM.16813-RA/Caur.EVM.12143-RA/Caur.EVM.21309-RA/Caur.EVM.36319-RA/Caur.EVM.20787-RA/Caur.EVM.23098-RA/Caur.EVM.16205-RA/Caur.EVM.38266-RA/Caur.EVM.19076-RA/Caur.EVM.34437-RA/Caur.EVM.02865-RA/Caur.EVM.18137-RA/Caur.EVM.27171-RA/Caur.EVM.15983-RA/Caur.EVM.08265-RA/Caur.EVM.15994-RA/Caur.EVM.09557-RA/Cau…	87
GO:0006479	BP	GO:0006479	protein methylation	0.0463619	0.782827	0.772593	Caur.EVM.20915-RA/Caur.EVM.26047-RA/Caur.EVM.08597-RA/Caur.EVM.05768-RA/Caur.EVM.21729-RA/Caur.EVM.24709-RA/Caur.EVM.34170-RA/Caur.EVM.00101-RA/Caur.EVM.30244-RA/Caur.EVM.10659-RA/Caur.EVM.02076-RA/Caur.EVM.18843-RA/Caur.EVM.10544-RA/Caur.EVM.33459-RA/Caur.EVM.35416-RA/Caur.EVM.19290-RA/Caur.EVM.27570-RA/Caur.EVM.14975-RA/Caur.EVM.20824-RA/Caur.EVM.03585-RA/Caur.EVM.17481-RA/Caur.EVM.34398-RA/Cau…	37
GO:0008213	BP	GO:0008213	protein alkylation	0.0463619	0.782827	0.772593	Caur.EVM.20915-RA/Caur.EVM.26047-RA/Caur.EVM.08597-RA/Caur.EVM.05768-RA/Caur.EVM.21729-RA/Caur.EVM.24709-RA/Caur.EVM.34170-RA/Caur.EVM.00101-RA/Caur.EVM.30244-RA/Caur.EVM.10659-RA/Caur.EVM.02076-RA/Caur.EVM.18843-RA/Caur.EVM.10544-RA/Caur.EVM.33459-RA/Caur.EVM.35416-RA/Caur.EVM.19290-RA/Caur.EVM.27570-RA/Caur.EVM.14975-RA/Caur.EVM.20824-RA/Caur.EVM.03585-RA/Caur.EVM.17481-RA/Caur.EVM.34398-RA/Cau…	37
GO:0009991	BP	GO:0009991	response to extracellular stimulus	0.0466347	0.782827	0.772593	Caur.EVM.06479-RA/Caur.EVM.19653-RA/Caur.EVM.13816-RA/Caur.EVM.11833-RA/Caur.EVM.24059-RA/Caur.EVM.12768-RA/Caur.EVM.14718-RA/Caur.EVM.11045-RA/Caur.EVM.36979-RA/Caur.EVM.14597-RA/Caur.EVM.30386-RA/Caur.EVM.03585-RA/Caur.EVM.14230-RA/Caur.EVM.01654-RA/Caur.EVM.15739-RA/Caur.EVM.33224-RA/Caur.EVM.15340-RA/Caur.EVM.28086-RA/Caur.EVM.33703-RA/Caur.EVM.22628-RA/Caur.EVM.28763-RA/Caur.EVM.13852-RA/Cau…	115
GO:0035270	BP	GO:0035270	endocrine system development	0.0468515	0.782827	0.772593	Caur.EVM.10111-RA/Caur.EVM.36361-RA/Caur.EVM.01167-RA/Caur.EVM.02581-RA/Caur.EVM.13327-RA/Caur.EVM.22498-RA/Caur.EVM.16813-RA/Caur.EVM.33564-RA/Caur.EVM.19788-RA/Caur.EVM.12143-RA/Caur.EVM.30304-RA/Caur.EVM.23098-RA/Caur.EVM.38266-RA/Caur.EVM.34437-RA/Caur.EVM.02865-RA/Caur.EVM.30251-RA/Caur.EVM.18137-RA/Caur.EVM.08265-RA/Caur.EVM.17832-RA/Caur.EVM.09850-RA/Caur.EVM.15994-RA/Caur.EVM.17531-RA/Cau…	101
GO:0002064	BP	GO:0002064	epithelial cell development	0.0470896	0.782827	0.772593	Caur.EVM.33870-RA/Caur.EVM.10111-RA/Caur.EVM.01167-RA/Caur.EVM.34307-RA/Caur.EVM.22754-RA/Caur.EVM.34451-RA/Caur.EVM.13327-RA/Caur.EVM.16241-RA/Caur.EVM.06565-RA/Caur.EVM.37501-RA/Caur.EVM.00270-RA/Caur.EVM.32164-RA/Caur.EVM.12882-RA/Caur.EVM.25448-RA/Caur.EVM.33564-RA/Caur.EVM.19767-RA/Caur.EVM.09055-RA/Caur.EVM.37534-RA/Caur.EVM.27892-RA/Caur.EVM.30304-RA/Caur.EVM.29310-RA/Caur.EVM.38263-RA/Cau…	148
GO:0031099	BP	GO:0031099	regeneration	0.0471583	0.782827	0.772593	Caur.EVM.01737-RA/Caur.EVM.05657-RA/Caur.EVM.11899-RA/Caur.EVM.05187-RA/Caur.EVM.03732-RA/Caur.EVM.21576-RA/Caur.EVM.36707-RA/Caur.EVM.13816-RA/Caur.EVM.06565-RA/Caur.EVM.11833-RA/Caur.EVM.28678-RA/Caur.EVM.28318-RA/Caur.EVM.35680-RA/Caur.EVM.24059-RA/Caur.EVM.29925-RA/Caur.EVM.12612-RA/Caur.EVM.00886-RA/Caur.EVM.29847-RA/Caur.EVM.29310-RA/Caur.EVM.00179-RA/Caur.EVM.39134-RA/Caur.EVM.13679-RA/Cau…	126
GO:0014070	BP	GO:0014070	response to organic cyclic compound	0.0472482	0.782827	0.772593	Caur.EVM.33870-RA/Caur.EVM.10111-RA/Caur.EVM.26047-RA/Caur.EVM.19653-RA/Caur.EVM.06038-RA/Caur.EVM.02581-RA/Caur.EVM.22754-RA/Caur.EVM.38296-RA/Caur.EVM.13327-RA/Caur.EVM.22498-RA/Caur.EVM.13816-RA/Caur.EVM.19867-RA/Caur.EVM.11833-RA/Caur.EVM.19518-RA/Caur.EVM.24395-RA/Caur.EVM.35680-RA/Caur.EVM.24059-RA/Caur.EVM.19767-RA/Caur.EVM.12612-RA/Caur.EVM.11109-RA/Caur.EVM.07057-RA/Caur.EVM.11045-RA/Cau…	186
GO:0031638	BP	GO:0031638	zymogen activation	0.047811	0.78878	0.778468	Caur.EVM.30598-RA/Caur.EVM.24395-RA/Caur.EVM.15566-RA/Caur.EVM.23490-RA/Caur.EVM.08247-RA/Caur.EVM.25235-RA/Caur.EVM.36979-RA/Caur.EVM.27475-RA/Caur.EVM.01522-RA/Caur.EVM.15994-RA/Caur.EVM.35947-RA/Caur.EVM.14240-RA/Caur.EVM.07820-RA/Caur.EVM.11856-RA/Caur.EVM.09543-RA/Caur.EVM.31212-RA/Caur.EVM.32722-RA/Caur.EVM.01523-RA/Caur.EVM.16254-RA/Caur.EVM.32201-RA/Caur.EVM.07902-RA/Caur.EVM.36804-RA/Cau…	43
GO:0001525	BP	GO:0001525	angiogenesis	0.0481595	0.791163	0.78082	Caur.EVM.21713-RA/Caur.EVM.33870-RA/Caur.EVM.36361-RA/Caur.EVM.08121-RA/Caur.EVM.23310-RA/Caur.EVM.22754-RA/Caur.EVM.38156-RA/Caur.EVM.03649-RA/Caur.EVM.06565-RA/Caur.EVM.10529-RA/Caur.EVM.11833-RA/Caur.EVM.27934-RA/Caur.EVM.24395-RA/Caur.EVM.19788-RA/Caur.EVM.24408-RA/Caur.EVM.17220-RA/Caur.EVM.07527-RA/Caur.EVM.21302-RA/Caur.EVM.29310-RA/Caur.EVM.25495-RA/Caur.EVM.37417-RA/Caur.EVM.36979-RA/Cau…	206
GO:1902107	BP	GO:1902107	positive regulation of leukocyte differentiation	0.0486371	0.795638	0.785237	Caur.EVM.20606-RA/Caur.EVM.05445-RA/Caur.EVM.19653-RA/Caur.EVM.38296-RA/Caur.EVM.38120-RA/Caur.EVM.03585-RA/Caur.EVM.14240-RA/Caur.EVM.38295-RA/Caur.EVM.15110-RA/Caur.EVM.37870-RA/Caur.EVM.04686-RA/Caur.EVM.25283-RA/Caur.EVM.29103-RA/Caur.EVM.18038-RA/Caur.EVM.16446-RA/Caur.EVM.14071-RA/Caur.EVM.32799-RA/Caur.EVM.08656-RA/Caur.EVM.13190-RA	19
GO:0198738	BP	GO:0198738	cell-cell signaling by wnt	0.0492019	0.797922	0.787491	Caur.EVM.00956-RA/Caur.EVM.33870-RA/Caur.EVM.10111-RA/Caur.EVM.26232-RA/Caur.EVM.08217-RA/Caur.EVM.06722-RA/Caur.EVM.31909-RA/Caur.EVM.35270-RA/Caur.EVM.14703-RA/Caur.EVM.08459-RA/Caur.EVM.03315-RA/Caur.EVM.22754-RA/Caur.EVM.26557-RA/Caur.EVM.37837-RA/Caur.EVM.07496-RA/Caur.EVM.13327-RA/Caur.EVM.38532-RA/Caur.EVM.37937-RA/Caur.EVM.03232-RA/Caur.EVM.11833-RA/Caur.EVM.02913-RA/Caur.EVM.20466-RA/Cau…	191
GO:0022600	BP	GO:0022600	digestive system process	0.0493942	0.797922	0.787491	Caur.EVM.23863-RA/Caur.EVM.20466-RA/Caur.EVM.32089-RA/Caur.EVM.33663-RA/Caur.EVM.33662-RA/Caur.EVM.00995-RA/Caur.EVM.17594-RA/Caur.EVM.01278-RA/Caur.EVM.09640-RA/Caur.EVM.24576-RA/Caur.EVM.15182-RA/Caur.EVM.25812-RA/Caur.EVM.33688-RA/Caur.EVM.33613-RA/Caur.EVM.30208-RA/Caur.EVM.03101-RA/Caur.EVM.38854-RA/Caur.EVM.01228-RA/Caur.EVM.02558-RA/Caur.EVM.23508-RA/Caur.EVM.05419-RA/Caur.EVM.32291-RA/Cau…	24
GO:0033273	BP	GO:0033273	response to vitamin	0.0493942	0.797922	0.787491	Caur.EVM.19653-RA/Caur.EVM.13816-RA/Caur.EVM.24059-RA/Caur.EVM.01654-RA/Caur.EVM.15340-RA/Caur.EVM.28086-RA/Caur.EVM.33703-RA/Caur.EVM.10945-RA/Caur.EVM.23770-RA/Caur.EVM.33717-RA/Caur.EVM.27096-RA/Caur.EVM.28960-RA/Caur.EVM.18257-RA/Caur.EVM.09292-RA/Caur.EVM.34853-RA/Caur.EVM.34355-RA/Caur.EVM.06146-RA/Caur.EVM.14071-RA/Caur.EVM.38342-RA/Caur.EVM.34340-RA/Caur.EVM.31732-RA/Caur.EVM.26814-RA/Cau…	24
GO:0051651	BP	GO:0051651	maintenance of location in cell	0.0499059	0.799526	0.789073	Caur.EVM.33870-RA/Caur.EVM.15367-RA/Caur.EVM.07022-RA/Caur.EVM.22754-RA/Caur.EVM.34451-RA/Caur.EVM.17634-RA/Caur.EVM.20357-RA/Caur.EVM.17726-RA/Caur.EVM.02865-RA/Caur.EVM.13969-RA/Caur.EVM.34903-RA/Caur.EVM.06543-RA/Caur.EVM.37443-RA/Caur.EVM.24474-RA/Caur.EVM.04658-RA/Caur.EVM.26860-RA/Caur.EVM.30808-RA/Caur.EVM.16046-RA/Caur.EVM.21065-RA/Caur.EVM.14849-RA/Caur.EVM.32869-RA/Caur.EVM.38565-RA/Cau…	32
GO:0061005	BP	GO:0061005	cell differentiation involved in kidney development	0.0499059	0.799526	0.789073	Caur.EVM.33870-RA/Caur.EVM.01167-RA/Caur.EVM.22754-RA/Caur.EVM.16241-RA/Caur.EVM.33564-RA/Caur.EVM.30304-RA/Caur.EVM.36979-RA/Caur.EVM.21563-RA/Caur.EVM.02951-RA/Caur.EVM.33703-RA/Caur.EVM.34485-RA/Caur.EVM.06715-RA/Caur.EVM.28380-RA/Caur.EVM.30717-RA/Caur.EVM.01955-RA/Caur.EVM.33956-RA/Caur.EVM.20095-RA/Caur.EVM.35950-RA/Caur.EVM.22845-RA/Caur.EVM.14562-RA/Caur.EVM.34355-RA/Caur.EVM.02290-RA/Cau…	32
GO:0030315	CC	GO:0030315	T-tubule	0.00171531	0.244982	0.235904	Caur.EVM.14049-RA/Caur.EVM.14597-RA/Caur.EVM.25568-RA/Caur.EVM.21030-RA/Caur.EVM.14849-RA/Caur.EVM.05090-RA/Caur.EVM.01684-RA/Caur.EVM.08824-RA/Caur.EVM.37249-RA/Caur.EVM.15363-RA/Caur.EVM.14880-RA/Caur.EVM.12802-RA/Caur.EVM.25420-RA/Caur.EVM.27868-RA/Caur.EVM.30398-RA/Caur.EVM.09638-RA	16
GO:0008328	CC	GO:0008328	ionotropic glutamate receptor complex	0.00193292	0.244982	0.235904	Caur.EVM.29952-RA/Caur.EVM.11799-RA/Caur.EVM.16049-RA/Caur.EVM.31273-RA/Caur.EVM.18824-RA/Caur.EVM.17512-RA/Caur.EVM.21757-RA/Caur.EVM.26862-RA/Caur.EVM.15812-RA/Caur.EVM.12630-RA	10
GO:0098878	CC	GO:0098878	neurotransmitter receptor complex	0.00193292	0.244982	0.235904	Caur.EVM.29952-RA/Caur.EVM.11799-RA/Caur.EVM.16049-RA/Caur.EVM.31273-RA/Caur.EVM.18824-RA/Caur.EVM.17512-RA/Caur.EVM.21757-RA/Caur.EVM.26862-RA/Caur.EVM.15812-RA/Caur.EVM.12630-RA	10
GO:0031012	CC	GO:0031012	extracellular matrix	0.00219715	0.244982	0.235904	Caur.EVM.00956-RA/Caur.EVM.03732-RA/Caur.EVM.24334-RA/Caur.EVM.19925-RA/Caur.EVM.38296-RA/Caur.EVM.31360-RA/Caur.EVM.24395-RA/Caur.EVM.11110-RA/Caur.EVM.30114-RA/Caur.EVM.13056-RA/Caur.EVM.33878-RA/Caur.EVM.23034-RA/Caur.EVM.11868-RA/Caur.EVM.36003-RA/Caur.EVM.18109-RA/Caur.EVM.36002-RA/Caur.EVM.27171-RA/Caur.EVM.17083-RA/Caur.EVM.25932-RA/Caur.EVM.29335-RA/Caur.EVM.15234-RA/Caur.EVM.02374-RA/Cau…	139
GO:0034703	CC	GO:0034703	cation channel complex	0.00377592	0.336812	0.324332	Caur.EVM.29952-RA/Caur.EVM.24335-RA/Caur.EVM.32638-RA/Caur.EVM.03857-RA/Caur.EVM.01785-RA/Caur.EVM.33596-RA/Caur.EVM.17503-RA/Caur.EVM.16248-RA/Caur.EVM.16049-RA/Caur.EVM.31273-RA/Caur.EVM.33823-RA/Caur.EVM.04115-RA/Caur.EVM.35648-RA/Caur.EVM.18824-RA/Caur.EVM.05090-RA/Caur.EVM.17512-RA/Caur.EVM.26624-RA/Caur.EVM.31285-RA/Caur.EVM.13795-RA/Caur.EVM.05197-RA/Caur.EVM.17391-RA/Caur.EVM.16951-RA/Cau…	44
GO:0045121	CC	GO:0045121	membrane raft	0.00853855	0.413306	0.397991	Caur.EVM.06479-RA/Caur.EVM.16241-RA/Caur.EVM.13816-RA/Caur.EVM.09837-RA/Caur.EVM.01273-RA/Caur.EVM.30114-RA/Caur.EVM.11447-RA/Caur.EVM.14597-RA/Caur.EVM.30386-RA/Caur.EVM.18258-RA/Caur.EVM.06738-RA/Caur.EVM.08176-RA/Caur.EVM.14230-RA/Caur.EVM.34903-RA/Caur.EVM.35040-RA/Caur.EVM.14240-RA/Caur.EVM.35687-RA/Caur.EVM.19203-RA/Caur.EVM.30547-RA/Caur.EVM.18558-RA/Caur.EVM.05203-RA/Caur.EVM.01785-RA/Cau…	64
GO:0098857	CC	GO:0098857	membrane microdomain	0.00853855	0.413306	0.397991	Caur.EVM.06479-RA/Caur.EVM.16241-RA/Caur.EVM.13816-RA/Caur.EVM.09837-RA/Caur.EVM.01273-RA/Caur.EVM.30114-RA/Caur.EVM.11447-RA/Caur.EVM.14597-RA/Caur.EVM.30386-RA/Caur.EVM.18258-RA/Caur.EVM.06738-RA/Caur.EVM.08176-RA/Caur.EVM.14230-RA/Caur.EVM.34903-RA/Caur.EVM.35040-RA/Caur.EVM.14240-RA/Caur.EVM.35687-RA/Caur.EVM.19203-RA/Caur.EVM.30547-RA/Caur.EVM.18558-RA/Caur.EVM.05203-RA/Caur.EVM.01785-RA/Cau…	64
GO:0043005	CC	GO:0043005	neuron projection	0.0092453	0.413306	0.397991	Caur.EVM.19763-RA/Caur.EVM.33870-RA/Caur.EVM.08412-RA/Caur.EVM.15367-RA/Caur.EVM.16617-RA/Caur.EVM.37453-RA/Caur.EVM.19653-RA/Caur.EVM.03315-RA/Caur.EVM.11892-RA/Caur.EVM.22754-RA/Caur.EVM.26557-RA/Caur.EVM.07496-RA/Caur.EVM.38296-RA/Caur.EVM.16241-RA/Caur.EVM.38493-RA/Caur.EVM.13816-RA/Caur.EVM.06565-RA/Caur.EVM.11833-RA/Caur.EVM.38697-RA/Caur.EVM.09837-RA/Caur.EVM.35680-RA/Caur.EVM.15765-RA/Cau…	241
GO:0005777	CC	GO:0005777	peroxisome	0.0109184	0.413306	0.397991	Caur.EVM.16405-RA/Caur.EVM.30673-RA/Caur.EVM.16518-RA/Caur.EVM.08219-RA/Caur.EVM.30078-RA/Caur.EVM.02284-RA/Caur.EVM.06763-RA/Caur.EVM.17670-RA/Caur.EVM.11832-RA/Caur.EVM.11254-RA/Caur.EVM.01347-RA/Caur.EVM.10133-RA/Caur.EVM.34141-RA/Caur.EVM.16254-RA/Caur.EVM.37783-RA/Caur.EVM.13306-RA/Caur.EVM.08854-RA/Caur.EVM.35173-RA/Caur.EVM.04001-RA/Caur.EVM.02557-RA/Caur.EVM.05524-RA/Caur.EVM.20149-RA/Cau…	34
GO:0042579	CC	GO:0042579	microbody	0.0109184	0.413306	0.397991	Caur.EVM.16405-RA/Caur.EVM.30673-RA/Caur.EVM.16518-RA/Caur.EVM.08219-RA/Caur.EVM.30078-RA/Caur.EVM.02284-RA/Caur.EVM.06763-RA/Caur.EVM.17670-RA/Caur.EVM.11832-RA/Caur.EVM.11254-RA/Caur.EVM.01347-RA/Caur.EVM.10133-RA/Caur.EVM.34141-RA/Caur.EVM.16254-RA/Caur.EVM.37783-RA/Caur.EVM.13306-RA/Caur.EVM.08854-RA/Caur.EVM.35173-RA/Caur.EVM.04001-RA/Caur.EVM.02557-RA/Caur.EVM.05524-RA/Caur.EVM.20149-RA/Cau…	34
GO:0044421	CC	GO:0044421	extracellular region part	0.0116856	0.413306	0.397991	Caur.EVM.00956-RA/Caur.EVM.10111-RA/Caur.EVM.03732-RA/Caur.EVM.13546-RA/Caur.EVM.24334-RA/Caur.EVM.03433-RA/Caur.EVM.19925-RA/Caur.EVM.38296-RA/Caur.EVM.13327-RA/Caur.EVM.31360-RA/Caur.EVM.09837-RA/Caur.EVM.24395-RA/Caur.EVM.08611-RA/Caur.EVM.24059-RA/Caur.EVM.11110-RA/Caur.EVM.30114-RA/Caur.EVM.13056-RA/Caur.EVM.20053-RA/Caur.EVM.33878-RA/Caur.EVM.29479-RA/Caur.EVM.06675-RA/Caur.EVM.15919-RA/Cau…	248
GO:0098589	CC	GO:0098589	membrane region	0.0118835	0.413306	0.397991	Caur.EVM.06479-RA/Caur.EVM.16241-RA/Caur.EVM.13816-RA/Caur.EVM.09837-RA/Caur.EVM.01273-RA/Caur.EVM.30114-RA/Caur.EVM.11447-RA/Caur.EVM.14597-RA/Caur.EVM.30386-RA/Caur.EVM.18258-RA/Caur.EVM.06738-RA/Caur.EVM.08176-RA/Caur.EVM.14230-RA/Caur.EVM.34903-RA/Caur.EVM.35040-RA/Caur.EVM.14240-RA/Caur.EVM.35687-RA/Caur.EVM.19203-RA/Caur.EVM.30547-RA/Caur.EVM.18558-RA/Caur.EVM.05203-RA/Caur.EVM.01785-RA/Cau…	64
GO:0034702	CC	GO:0034702	ion channel complex	0.0125058	0.413306	0.397991	Caur.EVM.29952-RA/Caur.EVM.11799-RA/Caur.EVM.24335-RA/Caur.EVM.32638-RA/Caur.EVM.03857-RA/Caur.EVM.01785-RA/Caur.EVM.33596-RA/Caur.EVM.17503-RA/Caur.EVM.16248-RA/Caur.EVM.16049-RA/Caur.EVM.31273-RA/Caur.EVM.33823-RA/Caur.EVM.04115-RA/Caur.EVM.35648-RA/Caur.EVM.18824-RA/Caur.EVM.05090-RA/Caur.EVM.17512-RA/Caur.EVM.26624-RA/Caur.EVM.31285-RA/Caur.EVM.13795-RA/Caur.EVM.05197-RA/Caur.EVM.17391-RA/Cau…	55
GO:0031526	CC	GO:0031526	brush border membrane	0.0129737	0.413306	0.397991	Caur.EVM.38296-RA/Caur.EVM.13296-RA/Caur.EVM.13633-RA/Caur.EVM.12594-RA/Caur.EVM.34637-RA/Caur.EVM.00345-RA/Caur.EVM.38295-RA/Caur.EVM.26674-RA/Caur.EVM.14894-RA/Caur.EVM.30208-RA/Caur.EVM.05419-RA/Caur.EVM.23920-RA	12
GO:0005604	CC	GO:0005604	basement membrane	0.0158996	0.421319	0.405707	Caur.EVM.03732-RA/Caur.EVM.24334-RA/Caur.EVM.19925-RA/Caur.EVM.31360-RA/Caur.EVM.13056-RA/Caur.EVM.11868-RA/Caur.EVM.25932-RA/Caur.EVM.29335-RA/Caur.EVM.02374-RA/Caur.EVM.36351-RA/Caur.EVM.27475-RA/Caur.EVM.27065-RA/Caur.EVM.34835-RA/Caur.EVM.29139-RA/Caur.EVM.11856-RA/Caur.EVM.36398-RA/Caur.EVM.05709-RA/Caur.EVM.01702-RA/Caur.EVM.00189-RA/Caur.EVM.13141-RA/Caur.EVM.15058-RA/Caur.EVM.18038-RA/Cau…	39
GO:0005581	CC	GO:0005581	collagen trimer	0.0161465	0.421319	0.405707	Caur.EVM.03732-RA/Caur.EVM.24334-RA/Caur.EVM.31360-RA/Caur.EVM.25932-RA/Caur.EVM.29335-RA/Caur.EVM.02374-RA/Caur.EVM.36351-RA/Caur.EVM.27475-RA/Caur.EVM.32036-RA/Caur.EVM.34835-RA/Caur.EVM.11856-RA/Caur.EVM.31181-RA/Caur.EVM.32506-RA/Caur.EVM.05178-RA/Caur.EVM.05709-RA/Caur.EVM.08690-RA/Caur.EVM.13141-RA/Caur.EVM.29954-RA/Caur.EVM.15058-RA/Caur.EVM.04714-RA/Caur.EVM.33099-RA/Caur.EVM.30144-RA/Cau…	42
GO:0044420	CC	GO:0044420	extracellular matrix component	0.0171611	0.421319	0.405707	Caur.EVM.03732-RA/Caur.EVM.24334-RA/Caur.EVM.19925-RA/Caur.EVM.31360-RA/Caur.EVM.13056-RA/Caur.EVM.11868-RA/Caur.EVM.25932-RA/Caur.EVM.29335-RA/Caur.EVM.02374-RA/Caur.EVM.36351-RA/Caur.EVM.27475-RA/Caur.EVM.32036-RA/Caur.EVM.27065-RA/Caur.EVM.34835-RA/Caur.EVM.29139-RA/Caur.EVM.11856-RA/Caur.EVM.31181-RA/Caur.EVM.32506-RA/Caur.EVM.36398-RA/Caur.EVM.05178-RA/Caur.EVM.05709-RA/Caur.EVM.01702-RA/Cau…	58
GO:0044438	CC	GO:0044438	microbody part	0.0181859	0.421319	0.405707	Caur.EVM.16518-RA/Caur.EVM.08219-RA/Caur.EVM.30078-RA/Caur.EVM.02284-RA/Caur.EVM.06763-RA/Caur.EVM.17670-RA/Caur.EVM.11254-RA/Caur.EVM.01347-RA/Caur.EVM.34141-RA/Caur.EVM.37783-RA/Caur.EVM.20149-RA/Caur.EVM.19894-RA/Caur.EVM.29060-RA/Caur.EVM.05419-RA/Caur.EVM.29061-RA/Caur.EVM.03851-RA/Caur.EVM.28645-RA/Caur.EVM.26890-RA/Caur.EVM.13328-RA	19
GO:0044439	CC	GO:0044439	peroxisomal part	0.0181859	0.421319	0.405707	Caur.EVM.16518-RA/Caur.EVM.08219-RA/Caur.EVM.30078-RA/Caur.EVM.02284-RA/Caur.EVM.06763-RA/Caur.EVM.17670-RA/Caur.EVM.11254-RA/Caur.EVM.01347-RA/Caur.EVM.34141-RA/Caur.EVM.37783-RA/Caur.EVM.20149-RA/Caur.EVM.19894-RA/Caur.EVM.29060-RA/Caur.EVM.05419-RA/Caur.EVM.29061-RA/Caur.EVM.03851-RA/Caur.EVM.28645-RA/Caur.EVM.26890-RA/Caur.EVM.13328-RA	19
GO:1902495	CC	GO:1902495	transmembrane transporter complex	0.0188932	0.421319	0.405707	Caur.EVM.29952-RA/Caur.EVM.11799-RA/Caur.EVM.24335-RA/Caur.EVM.32638-RA/Caur.EVM.03857-RA/Caur.EVM.01785-RA/Caur.EVM.33596-RA/Caur.EVM.04186-RA/Caur.EVM.17503-RA/Caur.EVM.28599-RA/Caur.EVM.16248-RA/Caur.EVM.16049-RA/Caur.EVM.31273-RA/Caur.EVM.33823-RA/Caur.EVM.04115-RA/Caur.EVM.35648-RA/Caur.EVM.18824-RA/Caur.EVM.05090-RA/Caur.EVM.17512-RA/Caur.EVM.26624-RA/Caur.EVM.31285-RA/Caur.EVM.13795-RA/Cau…	59
GO:0042383	CC	GO:0042383	sarcolemma	0.0224184	0.435809	0.41966	Caur.EVM.14049-RA/Caur.EVM.37315-RA/Caur.EVM.14597-RA/Caur.EVM.25568-RA/Caur.EVM.36773-RA/Caur.EVM.21030-RA/Caur.EVM.17910-RA/Caur.EVM.15340-RA/Caur.EVM.14908-RA/Caur.EVM.34266-RA/Caur.EVM.17503-RA/Caur.EVM.14849-RA/Caur.EVM.05090-RA/Caur.EVM.31285-RA/Caur.EVM.00360-RA/Caur.EVM.01684-RA/Caur.EVM.08824-RA/Caur.EVM.19408-RA/Caur.EVM.37249-RA/Caur.EVM.15363-RA/Caur.EVM.14880-RA/Caur.EVM.12802-RA/Cau…	30
GO:0120038	CC	GO:0120038	plasma membrane bounded cell projection part	0.027655	0.435809	0.41966	Caur.EVM.19763-RA/Caur.EVM.33870-RA/Caur.EVM.35230-RA/Caur.EVM.15367-RA/Caur.EVM.37453-RA/Caur.EVM.19653-RA/Caur.EVM.03315-RA/Caur.EVM.11892-RA/Caur.EVM.22754-RA/Caur.EVM.26557-RA/Caur.EVM.07496-RA/Caur.EVM.38296-RA/Caur.EVM.16241-RA/Caur.EVM.06565-RA/Caur.EVM.19867-RA/Caur.EVM.11833-RA/Caur.EVM.38697-RA/Caur.EVM.09837-RA/Caur.EVM.16778-RA/Caur.EVM.15765-RA/Caur.EVM.24408-RA/Caur.EVM.18070-RA/Cau…	225
GO:1990351	CC	GO:1990351	transporter complex	0.0277651	0.435809	0.41966	Caur.EVM.29952-RA/Caur.EVM.11799-RA/Caur.EVM.24335-RA/Caur.EVM.32638-RA/Caur.EVM.03857-RA/Caur.EVM.01785-RA/Caur.EVM.33596-RA/Caur.EVM.04186-RA/Caur.EVM.17503-RA/Caur.EVM.28599-RA/Caur.EVM.16248-RA/Caur.EVM.16049-RA/Caur.EVM.31273-RA/Caur.EVM.33823-RA/Caur.EVM.04115-RA/Caur.EVM.35648-RA/Caur.EVM.18824-RA/Caur.EVM.05090-RA/Caur.EVM.17512-RA/Caur.EVM.26624-RA/Caur.EVM.31285-RA/Caur.EVM.13795-RA/Cau…	60
GO:0044463	CC	GO:0044463	cell projection part	0.0296769	0.435809	0.41966	Caur.EVM.19763-RA/Caur.EVM.24128-RA/Caur.EVM.33870-RA/Caur.EVM.35230-RA/Caur.EVM.15367-RA/Caur.EVM.37453-RA/Caur.EVM.19653-RA/Caur.EVM.03315-RA/Caur.EVM.11892-RA/Caur.EVM.22754-RA/Caur.EVM.26557-RA/Caur.EVM.07496-RA/Caur.EVM.38296-RA/Caur.EVM.24536-RA/Caur.EVM.16241-RA/Caur.EVM.06565-RA/Caur.EVM.19867-RA/Caur.EVM.11833-RA/Caur.EVM.38697-RA/Caur.EVM.09837-RA/Caur.EVM.16778-RA/Caur.EVM.09218-RA/Cau…	247
GO:0098644	CC	GO:0098644	complex of collagen trimers	0.0307163	0.435809	0.41966	Caur.EVM.03732-RA/Caur.EVM.24334-RA/Caur.EVM.31360-RA/Caur.EVM.25932-RA/Caur.EVM.29335-RA/Caur.EVM.02374-RA/Caur.EVM.36351-RA/Caur.EVM.27475-RA/Caur.EVM.32036-RA/Caur.EVM.34835-RA/Caur.EVM.11856-RA/Caur.EVM.31181-RA/Caur.EVM.32506-RA/Caur.EVM.05709-RA/Caur.EVM.08690-RA/Caur.EVM.15058-RA/Caur.EVM.04714-RA/Caur.EVM.33099-RA/Caur.EVM.30144-RA/Caur.EVM.37440-RA/Caur.EVM.26403-RA/Caur.EVM.13164-RA/Cau…	35
GO:0030935	CC	GO:0030935	sheet-forming collagen trimer	0.0313328	0.435809	0.41966	Caur.EVM.24334-RA/Caur.EVM.25932-RA/Caur.EVM.02374-RA/Caur.EVM.27475-RA/Caur.EVM.34835-RA/Caur.EVM.11856-RA/Caur.EVM.33099-RA/Caur.EVM.37440-RA/Caur.EVM.37879-RA/Caur.EVM.03785-RA/Caur.EVM.00666-RA/Caur.EVM.26732-RA/Caur.EVM.13437-RA/Caur.EVM.18622-RA	14
GO:0043204	CC	GO:0043204	perikaryon	0.0313328	0.435809	0.41966	Caur.EVM.07496-RA/Caur.EVM.11045-RA/Caur.EVM.05380-RA/Caur.EVM.16249-RA/Caur.EVM.11553-RA/Caur.EVM.20386-RA/Caur.EVM.17503-RA/Caur.EVM.24790-RA/Caur.EVM.16096-RA/Caur.EVM.31285-RA/Caur.EVM.37663-RA/Caur.EVM.09241-RA/Caur.EVM.26888-RA/Caur.EVM.35778-RA	14
GO:0044447	CC	GO:0044447	axoneme part	0.0313328	0.435809	0.41966	Caur.EVM.19763-RA/Caur.EVM.15765-RA/Caur.EVM.25640-RA/Caur.EVM.38221-RA/Caur.EVM.00255-RA/Caur.EVM.20623-RA/Caur.EVM.03766-RA/Caur.EVM.19875-RA/Caur.EVM.33207-RA/Caur.EVM.03955-RA/Caur.EVM.27230-RA/Caur.EVM.32332-RA/Caur.EVM.09299-RA/Caur.EVM.01157-RA	14
GO:0098642	CC	GO:0098642	network-forming collagen trimer	0.0313328	0.435809	0.41966	Caur.EVM.24334-RA/Caur.EVM.25932-RA/Caur.EVM.02374-RA/Caur.EVM.27475-RA/Caur.EVM.34835-RA/Caur.EVM.11856-RA/Caur.EVM.33099-RA/Caur.EVM.37440-RA/Caur.EVM.37879-RA/Caur.EVM.03785-RA/Caur.EVM.00666-RA/Caur.EVM.26732-RA/Caur.EVM.13437-RA/Caur.EVM.18622-RA	14
GO:0098645	CC	GO:0098645	collagen network	0.0313328	0.435809	0.41966	Caur.EVM.24334-RA/Caur.EVM.25932-RA/Caur.EVM.02374-RA/Caur.EVM.27475-RA/Caur.EVM.34835-RA/Caur.EVM.11856-RA/Caur.EVM.33099-RA/Caur.EVM.37440-RA/Caur.EVM.37879-RA/Caur.EVM.03785-RA/Caur.EVM.00666-RA/Caur.EVM.26732-RA/Caur.EVM.13437-RA/Caur.EVM.18622-RA	14
GO:0098646	CC	GO:0098646	collagen sheet	0.0313328	0.435809	0.41966	Caur.EVM.24334-RA/Caur.EVM.25932-RA/Caur.EVM.02374-RA/Caur.EVM.27475-RA/Caur.EVM.34835-RA/Caur.EVM.11856-RA/Caur.EVM.33099-RA/Caur.EVM.37440-RA/Caur.EVM.37879-RA/Caur.EVM.03785-RA/Caur.EVM.00666-RA/Caur.EVM.26732-RA/Caur.EVM.13437-RA/Caur.EVM.18622-RA	14
GO:0098651	CC	GO:0098651	basement membrane collagen trimer	0.0313328	0.435809	0.41966	Caur.EVM.24334-RA/Caur.EVM.25932-RA/Caur.EVM.02374-RA/Caur.EVM.27475-RA/Caur.EVM.34835-RA/Caur.EVM.11856-RA/Caur.EVM.33099-RA/Caur.EVM.37440-RA/Caur.EVM.37879-RA/Caur.EVM.03785-RA/Caur.EVM.00666-RA/Caur.EVM.26732-RA/Caur.EVM.13437-RA/Caur.EVM.18622-RA	14
GO:0005903	CC	GO:0005903	brush border	0.0332231	0.435809	0.41966	Caur.EVM.38296-RA/Caur.EVM.13296-RA/Caur.EVM.13633-RA/Caur.EVM.12594-RA/Caur.EVM.34637-RA/Caur.EVM.00345-RA/Caur.EVM.38295-RA/Caur.EVM.26674-RA/Caur.EVM.14894-RA/Caur.EVM.30208-RA/Caur.EVM.05419-RA/Caur.EVM.23920-RA	12
GO:0045298	CC	GO:0045298	tubulin complex	0.0332231	0.435809	0.41966	Caur.EVM.19763-RA/Caur.EVM.16617-RA/Caur.EVM.15765-RA/Caur.EVM.34378-RA/Caur.EVM.30060-RA/Caur.EVM.16618-RA/Caur.EVM.15687-RA/Caur.EVM.08411-RA/Caur.EVM.03800-RA/Caur.EVM.29516-RA/Caur.EVM.03296-RA/Caur.EVM.01157-RA	12
GO:0062023	CC	GO:0062023	collagen-containing extracellular matrix	0.0382191	0.478186	0.460467	Caur.EVM.03732-RA/Caur.EVM.24334-RA/Caur.EVM.19925-RA/Caur.EVM.31360-RA/Caur.EVM.13056-RA/Caur.EVM.11868-RA/Caur.EVM.25932-RA/Caur.EVM.29335-RA/Caur.EVM.02374-RA/Caur.EVM.36351-RA/Caur.EVM.27475-RA/Caur.EVM.32036-RA/Caur.EVM.27065-RA/Caur.EVM.34835-RA/Caur.EVM.29139-RA/Caur.EVM.11856-RA/Caur.EVM.31181-RA/Caur.EVM.32506-RA/Caur.EVM.36398-RA/Caur.EVM.05709-RA/Caur.EVM.01702-RA/Caur.EVM.00189-RA/Cau…	57
GO:0043197	CC	GO:0043197	dendritic spine	0.0396701	0.478186	0.460467	Caur.EVM.07496-RA/Caur.EVM.11833-RA/Caur.EVM.24408-RA/Caur.EVM.11799-RA/Caur.EVM.14597-RA/Caur.EVM.35001-RA/Caur.EVM.08732-RA/Caur.EVM.05380-RA/Caur.EVM.06738-RA/Caur.EVM.12558-RA/Caur.EVM.11553-RA/Caur.EVM.15340-RA/Caur.EVM.24474-RA/Caur.EVM.07030-RA/Caur.EVM.06209-RA/Caur.EVM.35721-RA/Caur.EVM.35610-RA/Caur.EVM.39035-RA/Caur.EVM.15846-RA/Caur.EVM.05326-RA/Caur.EVM.17742-RA/Caur.EVM.21757-RA/Cau…	28
GO:0044309	CC	GO:0044309	neuron spine	0.0396701	0.478186	0.460467	Caur.EVM.07496-RA/Caur.EVM.11833-RA/Caur.EVM.24408-RA/Caur.EVM.11799-RA/Caur.EVM.14597-RA/Caur.EVM.35001-RA/Caur.EVM.08732-RA/Caur.EVM.05380-RA/Caur.EVM.06738-RA/Caur.EVM.12558-RA/Caur.EVM.11553-RA/Caur.EVM.15340-RA/Caur.EVM.24474-RA/Caur.EVM.07030-RA/Caur.EVM.06209-RA/Caur.EVM.35721-RA/Caur.EVM.35610-RA/Caur.EVM.39035-RA/Caur.EVM.15846-RA/Caur.EVM.05326-RA/Caur.EVM.17742-RA/Caur.EVM.21757-RA/Cau…	28
GO:0000785	CC	GO:0000785	chromatin	0.0418422	0.491095	0.472898	Caur.EVM.04835-RA/Caur.EVM.00040-RA/Caur.EVM.38880-RA/Caur.EVM.18178-RA/Caur.EVM.19653-RA/Caur.EVM.08597-RA/Caur.EVM.14532-RA/Caur.EVM.02581-RA/Caur.EVM.22498-RA/Caur.EVM.15637-RA/Caur.EVM.04872-RA/Caur.EVM.19518-RA/Caur.EVM.32601-RA/Caur.EVM.13536-RA/Caur.EVM.19997-RA/Caur.EVM.12627-RA/Caur.EVM.07776-RA/Caur.EVM.11071-RA/Caur.EVM.18843-RA/Caur.EVM.15199-RA/Caur.EVM.11109-RA/Caur.EVM.30304-RA/Cau…	85
GO:0005261	MF	GO:0005261	cation channel activity	0.000316089	0.139874	0.133533	Caur.EVM.35230-RA/Caur.EVM.19925-RA/Caur.EVM.03982-RA/Caur.EVM.34322-RA/Caur.EVM.24335-RA/Caur.EVM.14898-RA/Caur.EVM.32638-RA/Caur.EVM.13085-RA/Caur.EVM.01094-RA/Caur.EVM.12558-RA/Caur.EVM.27202-RA/Caur.EVM.03857-RA/Caur.EVM.22304-RA/Caur.EVM.15739-RA/Caur.EVM.30078-RA/Caur.EVM.33136-RA/Caur.EVM.34735-RA/Caur.EVM.39018-RA/Caur.EVM.13757-RA/Caur.EVM.01785-RA/Caur.EVM.13523-RA/Caur.EVM.20791-RA/Cau…	136
GO:0022836	MF	GO:0022836	gated channel activity	0.00060168	0.139874	0.133533	Caur.EVM.05054-RA/Caur.EVM.03982-RA/Caur.EVM.34322-RA/Caur.EVM.24335-RA/Caur.EVM.14898-RA/Caur.EVM.35478-RA/Caur.EVM.32638-RA/Caur.EVM.13085-RA/Caur.EVM.25554-RA/Caur.EVM.01094-RA/Caur.EVM.22883-RA/Caur.EVM.12558-RA/Caur.EVM.27202-RA/Caur.EVM.03857-RA/Caur.EVM.38148-RA/Caur.EVM.22304-RA/Caur.EVM.07787-RA/Caur.EVM.15739-RA/Caur.EVM.30078-RA/Caur.EVM.33136-RA/Caur.EVM.34735-RA/Caur.EVM.39018-RA/Cau…	145
GO:0022839	MF	GO:0022839	ion gated channel activity	0.000810078	0.139874	0.133533	Caur.EVM.05054-RA/Caur.EVM.03982-RA/Caur.EVM.34322-RA/Caur.EVM.24335-RA/Caur.EVM.14898-RA/Caur.EVM.35478-RA/Caur.EVM.32638-RA/Caur.EVM.13085-RA/Caur.EVM.25554-RA/Caur.EVM.01094-RA/Caur.EVM.22883-RA/Caur.EVM.12558-RA/Caur.EVM.27202-RA/Caur.EVM.03857-RA/Caur.EVM.22304-RA/Caur.EVM.15739-RA/Caur.EVM.30078-RA/Caur.EVM.33136-RA/Caur.EVM.34735-RA/Caur.EVM.39018-RA/Caur.EVM.13757-RA/Caur.EVM.01785-RA/Cau…	142
GO:0070300	MF	GO:0070300	phosphatidic acid binding	0.00153795	0.139874	0.133533	Caur.EVM.12611-RA/Caur.EVM.33451-RA/Caur.EVM.29282-RA/Caur.EVM.10642-RA/Caur.EVM.34903-RA/Caur.EVM.29664-RA/Caur.EVM.06048-RA/Caur.EVM.06243-RA/Caur.EVM.12443-RA/Caur.EVM.02447-RA/Caur.EVM.14301-RA/Caur.EVM.03259-RA/Caur.EVM.02446-RA/Caur.EVM.07851-RA/Caur.EVM.02445-RA/Caur.EVM.02457-RA/Caur.EVM.23087-RA/Caur.EVM.04727-RA/Caur.EVM.07379-RA/Caur.EVM.23873-RA/Caur.EVM.34477-RA/Caur.EVM.31031-RA/Cau…	40
GO:0046873	MF	GO:0046873	metal ion transmembrane transporter activity	0.00199761	0.139874	0.133533	Caur.EVM.35230-RA/Caur.EVM.19575-RA/Caur.EVM.19925-RA/Caur.EVM.15528-RA/Caur.EVM.34322-RA/Caur.EVM.04463-RA/Caur.EVM.38821-RA/Caur.EVM.21117-RA/Caur.EVM.24335-RA/Caur.EVM.11447-RA/Caur.EVM.14898-RA/Caur.EVM.16220-RA/Caur.EVM.14597-RA/Caur.EVM.13245-RA/Caur.EVM.13296-RA/Caur.EVM.28075-RA/Caur.EVM.11332-RA/Caur.EVM.01549-RA/Caur.EVM.32638-RA/Caur.EVM.13085-RA/Caur.EVM.01094-RA/Caur.EVM.18043-RA/Cau…	162
GO:0022838	MF	GO:0022838	substrate-specific channel activity	0.00224194	0.139874	0.133533	Caur.EVM.35230-RA/Caur.EVM.05054-RA/Caur.EVM.19925-RA/Caur.EVM.03982-RA/Caur.EVM.34322-RA/Caur.EVM.24335-RA/Caur.EVM.14898-RA/Caur.EVM.35478-RA/Caur.EVM.32638-RA/Caur.EVM.13085-RA/Caur.EVM.25554-RA/Caur.EVM.01094-RA/Caur.EVM.22883-RA/Caur.EVM.12558-RA/Caur.EVM.27202-RA/Caur.EVM.03857-RA/Caur.EVM.22304-RA/Caur.EVM.15739-RA/Caur.EVM.30078-RA/Caur.EVM.33136-RA/Caur.EVM.34735-RA/Caur.EVM.39018-RA/Cau…	157
GO:0005216	MF	GO:0005216	ion channel activity	0.00228531	0.139874	0.133533	Caur.EVM.35230-RA/Caur.EVM.05054-RA/Caur.EVM.19925-RA/Caur.EVM.03982-RA/Caur.EVM.34322-RA/Caur.EVM.24335-RA/Caur.EVM.14898-RA/Caur.EVM.35478-RA/Caur.EVM.32638-RA/Caur.EVM.13085-RA/Caur.EVM.25554-RA/Caur.EVM.01094-RA/Caur.EVM.22883-RA/Caur.EVM.12558-RA/Caur.EVM.27202-RA/Caur.EVM.03857-RA/Caur.EVM.22304-RA/Caur.EVM.15739-RA/Caur.EVM.30078-RA/Caur.EVM.33136-RA/Caur.EVM.34735-RA/Caur.EVM.39018-RA/Cau…	154
GO:0008381	MF	GO:0008381	mechanosensitive ion channel activity	0.00246526	0.139874	0.133533	Caur.EVM.13757-RA/Caur.EVM.02388-RA/Caur.EVM.02200-RA/Caur.EVM.29469-RA/Caur.EVM.11733-RA/Caur.EVM.29470-RA/Caur.EVM.26012-RA/Caur.EVM.04116-RA/Caur.EVM.30510-RA/Caur.EVM.24550-RA	10
GO:0015267	MF	GO:0015267	channel activity	0.00255244	0.139874	0.133533	Caur.EVM.35230-RA/Caur.EVM.05054-RA/Caur.EVM.19925-RA/Caur.EVM.03982-RA/Caur.EVM.05548-RA/Caur.EVM.34322-RA/Caur.EVM.24335-RA/Caur.EVM.14898-RA/Caur.EVM.35478-RA/Caur.EVM.32638-RA/Caur.EVM.13085-RA/Caur.EVM.25554-RA/Caur.EVM.01094-RA/Caur.EVM.22883-RA/Caur.EVM.12558-RA/Caur.EVM.27202-RA/Caur.EVM.03857-RA/Caur.EVM.38148-RA/Caur.EVM.22304-RA/Caur.EVM.07787-RA/Caur.EVM.01654-RA/Caur.EVM.15739-RA/Cau…	172
GO:0022803	MF	GO:0022803	passive transmembrane transporter activity	0.00255244	0.139874	0.133533	Caur.EVM.35230-RA/Caur.EVM.05054-RA/Caur.EVM.19925-RA/Caur.EVM.03982-RA/Caur.EVM.05548-RA/Caur.EVM.34322-RA/Caur.EVM.24335-RA/Caur.EVM.14898-RA/Caur.EVM.35478-RA/Caur.EVM.32638-RA/Caur.EVM.13085-RA/Caur.EVM.25554-RA/Caur.EVM.01094-RA/Caur.EVM.22883-RA/Caur.EVM.12558-RA/Caur.EVM.27202-RA/Caur.EVM.03857-RA/Caur.EVM.38148-RA/Caur.EVM.22304-RA/Caur.EVM.07787-RA/Caur.EVM.01654-RA/Caur.EVM.15739-RA/Cau…	172
GO:0022890	MF	GO:0022890	inorganic cation transmembrane transporter activity	0.00328827	0.163816	0.15639	Caur.EVM.35230-RA/Caur.EVM.19575-RA/Caur.EVM.19925-RA/Caur.EVM.15528-RA/Caur.EVM.03982-RA/Caur.EVM.34322-RA/Caur.EVM.04463-RA/Caur.EVM.38821-RA/Caur.EVM.32887-RA/Caur.EVM.21117-RA/Caur.EVM.24335-RA/Caur.EVM.11447-RA/Caur.EVM.14898-RA/Caur.EVM.01093-RA/Caur.EVM.16220-RA/Caur.EVM.14597-RA/Caur.EVM.13245-RA/Caur.EVM.13296-RA/Caur.EVM.28075-RA/Caur.EVM.11332-RA/Caur.EVM.01549-RA/Caur.EVM.32638-RA/Cau…	193
GO:0005267	MF	GO:0005267	potassium channel activity	0.00439312	0.185783	0.177361	Caur.EVM.24335-RA/Caur.EVM.01094-RA/Caur.EVM.33136-RA/Caur.EVM.13523-RA/Caur.EVM.16248-RA/Caur.EVM.13845-RA/Caur.EVM.33639-RA/Caur.EVM.07586-RA/Caur.EVM.18478-RA/Caur.EVM.30001-RA/Caur.EVM.04115-RA/Caur.EVM.35255-RA/Caur.EVM.05090-RA/Caur.EVM.11440-RA/Caur.EVM.18925-RA/Caur.EVM.26624-RA/Caur.EVM.14949-RA/Caur.EVM.03249-RA/Caur.EVM.22411-RA/Caur.EVM.17391-RA/Caur.EVM.30186-RA/Caur.EVM.31823-RA/Cau…	62
GO:0008324	MF	GO:0008324	cation transmembrane transporter activity	0.00462085	0.185783	0.177361	Caur.EVM.35230-RA/Caur.EVM.19575-RA/Caur.EVM.19925-RA/Caur.EVM.15528-RA/Caur.EVM.03982-RA/Caur.EVM.34322-RA/Caur.EVM.04463-RA/Caur.EVM.38821-RA/Caur.EVM.32887-RA/Caur.EVM.21117-RA/Caur.EVM.24335-RA/Caur.EVM.11447-RA/Caur.EVM.14898-RA/Caur.EVM.01093-RA/Caur.EVM.16220-RA/Caur.EVM.14597-RA/Caur.EVM.13245-RA/Caur.EVM.13296-RA/Caur.EVM.28075-RA/Caur.EVM.11332-RA/Caur.EVM.01549-RA/Caur.EVM.32638-RA/Cau…	206
GO:0005249	MF	GO:0005249	voltage-gated potassium channel activity	0.00503054	0.185783	0.177361	Caur.EVM.24335-RA/Caur.EVM.01094-RA/Caur.EVM.33136-RA/Caur.EVM.13523-RA/Caur.EVM.16248-RA/Caur.EVM.13845-RA/Caur.EVM.33639-RA/Caur.EVM.07586-RA/Caur.EVM.18478-RA/Caur.EVM.30001-RA/Caur.EVM.04115-RA/Caur.EVM.35255-RA/Caur.EVM.05090-RA/Caur.EVM.18925-RA/Caur.EVM.26624-RA/Caur.EVM.14949-RA/Caur.EVM.03249-RA/Caur.EVM.22411-RA/Caur.EVM.17391-RA/Caur.EVM.30186-RA/Caur.EVM.20340-RA/Caur.EVM.38828-RA/Cau…	55
GO:0022843	MF	GO:0022843	voltage-gated cation channel activity	0.0050853	0.185783	0.177361	Caur.EVM.24335-RA/Caur.EVM.01094-RA/Caur.EVM.12558-RA/Caur.EVM.27202-RA/Caur.EVM.03857-RA/Caur.EVM.22304-RA/Caur.EVM.33136-RA/Caur.EVM.01785-RA/Caur.EVM.13523-RA/Caur.EVM.17503-RA/Caur.EVM.16248-RA/Caur.EVM.33241-RA/Caur.EVM.31273-RA/Caur.EVM.13845-RA/Caur.EVM.33639-RA/Caur.EVM.07586-RA/Caur.EVM.18478-RA/Caur.EVM.30001-RA/Caur.EVM.04115-RA/Caur.EVM.35255-RA/Caur.EVM.35648-RA/Caur.EVM.10410-RA/Cau…	74
GO:0022857	MF	GO:0022857	transmembrane transporter activity	0.00611715	0.200766	0.191665	Caur.EVM.35230-RA/Caur.EVM.05054-RA/Caur.EVM.19575-RA/Caur.EVM.04062-RA/Caur.EVM.19925-RA/Caur.EVM.15528-RA/Caur.EVM.03982-RA/Caur.EVM.05548-RA/Caur.EVM.34322-RA/Caur.EVM.04463-RA/Caur.EVM.38821-RA/Caur.EVM.32887-RA/Caur.EVM.21117-RA/Caur.EVM.24335-RA/Caur.EVM.11447-RA/Caur.EVM.17336-RA/Caur.EVM.14898-RA/Caur.EVM.35478-RA/Caur.EVM.01093-RA/Caur.EVM.16220-RA/Caur.EVM.14597-RA/Caur.EVM.13245-RA/Cau…	299
GO:0015079	MF	GO:0015079	potassium ion transmembrane transporter activity	0.00622814	0.200766	0.191665	Caur.EVM.24335-RA/Caur.EVM.13245-RA/Caur.EVM.01094-RA/Caur.EVM.18043-RA/Caur.EVM.33136-RA/Caur.EVM.24256-RA/Caur.EVM.13523-RA/Caur.EVM.04186-RA/Caur.EVM.28599-RA/Caur.EVM.16248-RA/Caur.EVM.24790-RA/Caur.EVM.13845-RA/Caur.EVM.33639-RA/Caur.EVM.07586-RA/Caur.EVM.18478-RA/Caur.EVM.30001-RA/Caur.EVM.04115-RA/Caur.EVM.35255-RA/Caur.EVM.05090-RA/Caur.EVM.11440-RA/Caur.EVM.18925-RA/Caur.EVM.26624-RA/Cau…	70
GO:0046906	MF	GO:0046906	tetrapyrrole binding	0.00743646	0.226399	0.216136	Caur.EVM.15340-RA/Caur.EVM.15731-RA/Caur.EVM.23770-RA/Caur.EVM.17486-RA/Caur.EVM.04001-RA/Caur.EVM.23916-RA/Caur.EVM.21736-RA/Caur.EVM.06146-RA/Caur.EVM.21253-RA/Caur.EVM.15822-RA/Caur.EVM.00143-RA/Caur.EVM.11002-RA/Caur.EVM.06341-RA/Caur.EVM.35884-RA/Caur.EVM.36905-RA/Caur.EVM.35863-RA	16
GO:0015075	MF	GO:0015075	ion transmembrane transporter activity	0.00806338	0.226563	0.216293	Caur.EVM.35230-RA/Caur.EVM.05054-RA/Caur.EVM.19575-RA/Caur.EVM.04062-RA/Caur.EVM.19925-RA/Caur.EVM.15528-RA/Caur.EVM.03982-RA/Caur.EVM.34322-RA/Caur.EVM.04463-RA/Caur.EVM.38821-RA/Caur.EVM.32887-RA/Caur.EVM.21117-RA/Caur.EVM.24335-RA/Caur.EVM.11447-RA/Caur.EVM.17336-RA/Caur.EVM.14898-RA/Caur.EVM.35478-RA/Caur.EVM.01093-RA/Caur.EVM.16220-RA/Caur.EVM.14597-RA/Caur.EVM.13245-RA/Caur.EVM.13296-RA/Cau…	255
GO:0015077	MF	GO:0015077	monovalent inorganic cation transmembrane transporter activity	0.00922223	0.226563	0.216293	Caur.EVM.19575-RA/Caur.EVM.15528-RA/Caur.EVM.32887-RA/Caur.EVM.24335-RA/Caur.EVM.01093-RA/Caur.EVM.14597-RA/Caur.EVM.13245-RA/Caur.EVM.13296-RA/Caur.EVM.13085-RA/Caur.EVM.00815-RA/Caur.EVM.24618-RA/Caur.EVM.01094-RA/Caur.EVM.18043-RA/Caur.EVM.18208-RA/Caur.EVM.12558-RA/Caur.EVM.33136-RA/Caur.EVM.31354-RA/Caur.EVM.29371-RA/Caur.EVM.24256-RA/Caur.EVM.13523-RA/Caur.EVM.04186-RA/Caur.EVM.28599-RA/Cau…	104
GO:0005251	MF	GO:0005251	delayed rectifier potassium channel activity	0.00967092	0.226563	0.216293	Caur.EVM.24335-RA/Caur.EVM.01094-RA/Caur.EVM.33136-RA/Caur.EVM.13523-RA/Caur.EVM.33639-RA/Caur.EVM.07586-RA/Caur.EVM.30001-RA/Caur.EVM.04115-RA/Caur.EVM.35255-RA/Caur.EVM.03249-RA/Caur.EVM.22411-RA/Caur.EVM.17391-RA/Caur.EVM.38828-RA/Caur.EVM.01027-RA/Caur.EVM.23352-RA/Caur.EVM.24330-RA/Caur.EVM.24549-RA/Caur.EVM.07684-RA/Caur.EVM.23833-RA/Caur.EVM.00849-RA/Caur.EVM.26184-RA/Caur.EVM.01257-RA/Cau…	36
GO:0015318	MF	GO:0015318	inorganic molecular entity transmembrane transporter activity	0.0101881	0.226563	0.216293	Caur.EVM.35230-RA/Caur.EVM.05054-RA/Caur.EVM.19575-RA/Caur.EVM.04062-RA/Caur.EVM.19925-RA/Caur.EVM.15528-RA/Caur.EVM.03982-RA/Caur.EVM.34322-RA/Caur.EVM.04463-RA/Caur.EVM.38821-RA/Caur.EVM.32887-RA/Caur.EVM.21117-RA/Caur.EVM.24335-RA/Caur.EVM.11447-RA/Caur.EVM.17336-RA/Caur.EVM.14898-RA/Caur.EVM.35478-RA/Caur.EVM.01093-RA/Caur.EVM.16220-RA/Caur.EVM.14597-RA/Caur.EVM.13245-RA/Caur.EVM.13296-RA/Cau…	249
GO:0016209	MF	GO:0016209	antioxidant activity	0.0103359	0.226563	0.216293	Caur.EVM.01655-RA/Caur.EVM.25389-RA/Caur.EVM.36758-RA/Caur.EVM.23770-RA/Caur.EVM.24041-RA/Caur.EVM.02635-RA/Caur.EVM.07698-RA/Caur.EVM.09311-RA/Caur.EVM.33181-RA/Caur.EVM.06146-RA/Caur.EVM.05524-RA/Caur.EVM.29169-RA/Caur.EVM.13330-RA	13
GO:0016702	MF	GO:0016702	oxidoreductase activity, acting on single donors with incorporation of molecular oxygen, incorporation of two atoms of oxygen	0.0103359	0.226563	0.216293	Caur.EVM.26540-RA/Caur.EVM.33233-RA/Caur.EVM.04971-RA/Caur.EVM.24237-RA/Caur.EVM.23770-RA/Caur.EVM.08815-RA/Caur.EVM.03100-RA/Caur.EVM.01913-RA/Caur.EVM.01914-RA/Caur.EVM.06146-RA/Caur.EVM.04358-RA/Caur.EVM.24238-RA/Caur.EVM.30998-RA	13
GO:0019955	MF	GO:0019955	cytokine binding	0.0103359	0.226563	0.216293	Caur.EVM.20606-RA/Caur.EVM.05445-RA/Caur.EVM.34451-RA/Caur.EVM.02865-RA/Caur.EVM.05069-RA/Caur.EVM.17694-RA/Caur.EVM.10410-RA/Caur.EVM.23823-RA/Caur.EVM.06188-RA/Caur.EVM.29103-RA/Caur.EVM.18830-RA/Caur.EVM.07385-RA/Caur.EVM.10627-RA	13
GO:0048037	MF	GO:0048037	cofactor binding	0.0117236	0.247098	0.235896	Caur.EVM.04293-RA/Caur.EVM.26646-RA/Caur.EVM.18070-RA/Caur.EVM.03826-RA/Caur.EVM.02544-RA/Caur.EVM.17493-RA/Caur.EVM.16518-RA/Caur.EVM.08219-RA/Caur.EVM.02545-RA/Caur.EVM.21840-RA/Caur.EVM.15340-RA/Caur.EVM.22488-RA/Caur.EVM.12136-RA/Caur.EVM.05429-RA/Caur.EVM.34044-RA/Caur.EVM.10945-RA/Caur.EVM.15731-RA/Caur.EVM.11254-RA/Caur.EVM.23770-RA/Caur.EVM.17486-RA/Caur.EVM.04001-RA/Caur.EVM.23916-RA/Cau…	42
GO:0004601	MF	GO:0004601	peroxidase activity	0.0136081	0.265243	0.253219	Caur.EVM.01655-RA/Caur.EVM.25389-RA/Caur.EVM.23770-RA/Caur.EVM.24041-RA/Caur.EVM.02635-RA/Caur.EVM.07698-RA/Caur.EVM.09311-RA/Caur.EVM.06146-RA/Caur.EVM.05524-RA/Caur.EVM.13330-RA	10
GO:0016684	MF	GO:0016684	oxidoreductase activity, acting on peroxide as acceptor	0.0136081	0.265243	0.253219	Caur.EVM.01655-RA/Caur.EVM.25389-RA/Caur.EVM.23770-RA/Caur.EVM.24041-RA/Caur.EVM.02635-RA/Caur.EVM.07698-RA/Caur.EVM.09311-RA/Caur.EVM.06146-RA/Caur.EVM.05524-RA/Caur.EVM.13330-RA	10
GO:0016491	MF	GO:0016491	oxidoreductase activity	0.0140366	0.265243	0.253219	Caur.EVM.26540-RA/Caur.EVM.36947-RA/Caur.EVM.10111-RA/Caur.EVM.15467-RA/Caur.EVM.17389-RA/Caur.EVM.04293-RA/Caur.EVM.07063-RA/Caur.EVM.00814-RA/Caur.EVM.04683-RA/Caur.EVM.13327-RA/Caur.EVM.03649-RA/Caur.EVM.12351-RA/Caur.EVM.33233-RA/Caur.EVM.01655-RA/Caur.EVM.25389-RA/Caur.EVM.20362-RA/Caur.EVM.18070-RA/Caur.EVM.03826-RA/Caur.EVM.32785-RA/Caur.EVM.02544-RA/Caur.EVM.07248-RA/Caur.EVM.01093-RA/Cau…	123
GO:0051213	MF	GO:0051213	dioxygenase activity	0.0164651	0.300762	0.287128	Caur.EVM.26540-RA/Caur.EVM.03649-RA/Caur.EVM.33233-RA/Caur.EVM.27249-RA/Caur.EVM.12618-RA/Caur.EVM.04971-RA/Caur.EVM.24237-RA/Caur.EVM.36276-RA/Caur.EVM.23770-RA/Caur.EVM.08815-RA/Caur.EVM.10320-RA/Caur.EVM.03100-RA/Caur.EVM.01913-RA/Caur.EVM.16556-RA/Caur.EVM.01914-RA/Caur.EVM.26696-RA/Caur.EVM.06146-RA/Caur.EVM.38248-RA/Caur.EVM.04358-RA/Caur.EVM.24238-RA/Caur.EVM.30353-RA/Caur.EVM.30998-RA	22
GO:0043565	MF	GO:0043565	sequence-specific DNA binding	0.0192596	0.34046	0.325026	Caur.EVM.33870-RA/Caur.EVM.36361-RA/Caur.EVM.21961-RA/Caur.EVM.19653-RA/Caur.EVM.33890-RA/Caur.EVM.02045-RA/Caur.EVM.30544-RA/Caur.EVM.22754-RA/Caur.EVM.00857-RA/Caur.EVM.26955-RA/Caur.EVM.22540-RA/Caur.EVM.23426-RA/Caur.EVM.20466-RA/Caur.EVM.24538-RA/Caur.EVM.30304-RA/Caur.EVM.30559-RA/Caur.EVM.08247-RA/Caur.EVM.09269-RA/Caur.EVM.29378-RA/Caur.EVM.31440-RA/Caur.EVM.33019-RA/Caur.EVM.36979-RA/Cau…	157
GO:0042803	MF	GO:0042803	protein homodimerization activity	0.0202359	0.34654	0.33083	Caur.EVM.10111-RA/Caur.EVM.38296-RA/Caur.EVM.13327-RA/Caur.EVM.11110-RA/Caur.EVM.12612-RA/Caur.EVM.05389-RA/Caur.EVM.20053-RA/Caur.EVM.17070-RA/Caur.EVM.06675-RA/Caur.EVM.38263-RA/Caur.EVM.38245-RA/Caur.EVM.23034-RA/Caur.EVM.30559-RA/Caur.EVM.31783-RA/Caur.EVM.25235-RA/Caur.EVM.36979-RA/Caur.EVM.02865-RA/Caur.EVM.21776-RA/Caur.EVM.30953-RA/Caur.EVM.07976-RA/Caur.EVM.14975-RA/Caur.EVM.17083-RA/Cau…	129
GO:0046983	MF	GO:0046983	protein dimerization activity	0.0240696	0.37019	0.353409	Caur.EVM.10111-RA/Caur.EVM.19653-RA/Caur.EVM.07496-RA/Caur.EVM.38296-RA/Caur.EVM.13327-RA/Caur.EVM.11110-RA/Caur.EVM.12612-RA/Caur.EVM.05389-RA/Caur.EVM.20053-RA/Caur.EVM.17070-RA/Caur.EVM.06675-RA/Caur.EVM.38263-RA/Caur.EVM.38245-RA/Caur.EVM.23034-RA/Caur.EVM.26640-RA/Caur.EVM.30559-RA/Caur.EVM.31783-RA/Caur.EVM.25235-RA/Caur.EVM.33019-RA/Caur.EVM.36979-RA/Caur.EVM.02865-RA/Caur.EVM.21776-RA/Cau…	173
GO:0015276	MF	GO:0015276	ligand-gated ion channel activity	0.0249191	0.37019	0.353409	Caur.EVM.03982-RA/Caur.EVM.34322-RA/Caur.EVM.14898-RA/Caur.EVM.35478-RA/Caur.EVM.32638-RA/Caur.EVM.13085-RA/Caur.EVM.22883-RA/Caur.EVM.12558-RA/Caur.EVM.15739-RA/Caur.EVM.30078-RA/Caur.EVM.34735-RA/Caur.EVM.39018-RA/Caur.EVM.01785-RA/Caur.EVM.20791-RA/Caur.EVM.33596-RA/Caur.EVM.33241-RA/Caur.EVM.15859-RA/Caur.EVM.31273-RA/Caur.EVM.20880-RA/Caur.EVM.05085-RA/Caur.EVM.00129-RA/Caur.EVM.39178-RA/Cau…	62
GO:0022834	MF	GO:0022834	ligand-gated channel activity	0.0249191	0.37019	0.353409	Caur.EVM.03982-RA/Caur.EVM.34322-RA/Caur.EVM.14898-RA/Caur.EVM.35478-RA/Caur.EVM.32638-RA/Caur.EVM.13085-RA/Caur.EVM.22883-RA/Caur.EVM.12558-RA/Caur.EVM.15739-RA/Caur.EVM.30078-RA/Caur.EVM.34735-RA/Caur.EVM.39018-RA/Caur.EVM.01785-RA/Caur.EVM.20791-RA/Caur.EVM.33596-RA/Caur.EVM.33241-RA/Caur.EVM.15859-RA/Caur.EVM.31273-RA/Caur.EVM.20880-RA/Caur.EVM.05085-RA/Caur.EVM.00129-RA/Caur.EVM.39178-RA/Cau…	62
GO:0022832	MF	GO:0022832	voltage-gated channel activity	0.0269632	0.37019	0.353409	Caur.EVM.05054-RA/Caur.EVM.24335-RA/Caur.EVM.25554-RA/Caur.EVM.01094-RA/Caur.EVM.12558-RA/Caur.EVM.27202-RA/Caur.EVM.03857-RA/Caur.EVM.38148-RA/Caur.EVM.22304-RA/Caur.EVM.07787-RA/Caur.EVM.33136-RA/Caur.EVM.01785-RA/Caur.EVM.13523-RA/Caur.EVM.17503-RA/Caur.EVM.16248-RA/Caur.EVM.33241-RA/Caur.EVM.39013-RA/Caur.EVM.31273-RA/Caur.EVM.13845-RA/Caur.EVM.33639-RA/Caur.EVM.07586-RA/Caur.EVM.23630-RA/Cau…	82
GO:0004252	MF	GO:0004252	serine-type endopeptidase activity	0.0273923	0.37019	0.353409	Caur.EVM.34176-RA/Caur.EVM.36113-RA/Caur.EVM.25493-RA/Caur.EVM.04617-RA/Caur.EVM.17670-RA/Caur.EVM.34141-RA/Caur.EVM.33496-RA/Caur.EVM.10997-RA/Caur.EVM.34685-RA/Caur.EVM.09945-RA/Caur.EVM.28645-RA/Caur.EVM.19009-RA/Caur.EVM.12570-RA	13
GO:0005518	MF	GO:0005518	collagen binding	0.0273923	0.37019	0.353409	Caur.EVM.10111-RA/Caur.EVM.13327-RA/Caur.EVM.18502-RA/Caur.EVM.37870-RA/Caur.EVM.13141-RA/Caur.EVM.16501-RA/Caur.EVM.26709-RA/Caur.EVM.04744-RA/Caur.EVM.30118-RA/Caur.EVM.06644-RA/Caur.EVM.09517-RA/Caur.EVM.28341-RA/Caur.EVM.30016-RA	13
GO:0016701	MF	GO:0016701	oxidoreductase activity, acting on single donors with incorporation of molecular oxygen	0.0273923	0.37019	0.353409	Caur.EVM.26540-RA/Caur.EVM.33233-RA/Caur.EVM.04971-RA/Caur.EVM.24237-RA/Caur.EVM.23770-RA/Caur.EVM.08815-RA/Caur.EVM.03100-RA/Caur.EVM.01913-RA/Caur.EVM.01914-RA/Caur.EVM.06146-RA/Caur.EVM.04358-RA/Caur.EVM.24238-RA/Caur.EVM.30998-RA	13
GO:0020037	MF	GO:0020037	heme binding	0.0273923	0.37019	0.353409	Caur.EVM.15340-RA/Caur.EVM.15731-RA/Caur.EVM.23770-RA/Caur.EVM.04001-RA/Caur.EVM.23916-RA/Caur.EVM.21736-RA/Caur.EVM.06146-RA/Caur.EVM.21253-RA/Caur.EVM.15822-RA/Caur.EVM.06341-RA/Caur.EVM.35884-RA/Caur.EVM.36905-RA/Caur.EVM.35863-RA	13
GO:0016614	MF	GO:0016614	oxidoreductase activity, acting on CH-OH group of donors	0.0278645	0.37019	0.353409	Caur.EVM.10111-RA/Caur.EVM.17389-RA/Caur.EVM.00814-RA/Caur.EVM.13327-RA/Caur.EVM.05639-RA/Caur.EVM.02072-RA/Caur.EVM.00245-RA/Caur.EVM.27840-RA/Caur.EVM.16518-RA/Caur.EVM.08219-RA/Caur.EVM.33301-RA/Caur.EVM.17246-RA/Caur.EVM.14447-RA/Caur.EVM.17767-RA/Caur.EVM.38277-RA/Caur.EVM.28755-RA/Caur.EVM.11254-RA/Caur.EVM.15443-RA/Caur.EVM.18950-RA/Caur.EVM.15604-RA/Caur.EVM.17841-RA/Caur.EVM.31426-RA/Cau…	29
GO:0016705	MF	GO:0016705	oxidoreductase activity, acting on paired donors, with incorporation or reduction of molecular oxygen	0.0283723	0.37019	0.353409	Caur.EVM.04293-RA/Caur.EVM.03649-RA/Caur.EVM.20362-RA/Caur.EVM.18070-RA/Caur.EVM.02544-RA/Caur.EVM.07248-RA/Caur.EVM.34518-RA/Caur.EVM.02545-RA/Caur.EVM.27249-RA/Caur.EVM.12618-RA/Caur.EVM.15340-RA/Caur.EVM.34044-RA/Caur.EVM.38132-RA/Caur.EVM.36276-RA/Caur.EVM.23770-RA/Caur.EVM.24041-RA/Caur.EVM.08454-RA/Caur.EVM.10320-RA/Caur.EVM.09311-RA/Caur.EVM.16556-RA/Caur.EVM.05022-RA/Caur.EVM.04001-RA/Cau…	37
GO:0050662	MF	GO:0050662	coenzyme binding	0.0307654	0.39208	0.374306	Caur.EVM.04293-RA/Caur.EVM.26646-RA/Caur.EVM.18070-RA/Caur.EVM.02544-RA/Caur.EVM.16518-RA/Caur.EVM.08219-RA/Caur.EVM.02545-RA/Caur.EVM.21840-RA/Caur.EVM.15340-RA/Caur.EVM.22488-RA/Caur.EVM.12136-RA/Caur.EVM.05429-RA/Caur.EVM.34044-RA/Caur.EVM.10945-RA/Caur.EVM.11254-RA/Caur.EVM.04001-RA/Caur.EVM.14731-RA/Caur.EVM.17841-RA/Caur.EVM.31541-RA/Caur.EVM.21253-RA/Caur.EVM.32713-RA/Caur.EVM.35884-RA/Cau…	27
GO:0000978	MF	GO:0000978	RNA polymerase II proximal promoter sequence-specific DNA binding	0.0326163	0.406221	0.387806	Caur.EVM.19653-RA/Caur.EVM.30559-RA/Caur.EVM.08247-RA/Caur.EVM.36979-RA/Caur.EVM.15994-RA/Caur.EVM.05742-RA/Caur.EVM.04467-RA/Caur.EVM.25356-RA/Caur.EVM.02241-RA/Caur.EVM.05314-RA/Caur.EVM.08763-RA/Caur.EVM.14071-RA/Caur.EVM.01526-RA/Caur.EVM.20570-RA/Caur.EVM.38436-RA/Caur.EVM.21868-RA/Caur.EVM.24891-RA/Caur.EVM.28468-RA/Caur.EVM.35470-RA/Caur.EVM.30903-RA	20
GO:0005244	MF	GO:0005244	voltage-gated ion channel activity	0.0352376	0.429116	0.409663	Caur.EVM.05054-RA/Caur.EVM.24335-RA/Caur.EVM.25554-RA/Caur.EVM.01094-RA/Caur.EVM.12558-RA/Caur.EVM.27202-RA/Caur.EVM.03857-RA/Caur.EVM.22304-RA/Caur.EVM.33136-RA/Caur.EVM.01785-RA/Caur.EVM.13523-RA/Caur.EVM.17503-RA/Caur.EVM.16248-RA/Caur.EVM.33241-RA/Caur.EVM.39013-RA/Caur.EVM.31273-RA/Caur.EVM.13845-RA/Caur.EVM.33639-RA/Caur.EVM.07586-RA/Caur.EVM.18478-RA/Caur.EVM.30001-RA/Caur.EVM.04115-RA/Cau…	79
GO:0019199	MF	GO:0019199	transmembrane receptor protein kinase activity	0.0390188	0.458493	0.437708	Caur.EVM.34451-RA/Caur.EVM.13816-RA/Caur.EVM.06565-RA/Caur.EVM.19788-RA/Caur.EVM.29310-RA/Caur.EVM.30386-RA/Caur.EVM.02865-RA/Caur.EVM.08176-RA/Caur.EVM.14230-RA/Caur.EVM.28072-RA/Caur.EVM.07088-RA/Caur.EVM.20386-RA/Caur.EVM.33718-RA/Caur.EVM.33071-RA/Caur.EVM.11769-RA/Caur.EVM.30683-RA/Caur.EVM.35172-RA/Caur.EVM.30119-RA/Caur.EVM.23823-RA/Caur.EVM.26707-RA/Caur.EVM.06188-RA/Caur.EVM.21119-RA/Cau…	31
GO:0016627	MF	GO:0016627	oxidoreductase activity, acting on the CH-CH group of donors	0.0400079	0.458493	0.437708	Caur.EVM.36947-RA/Caur.EVM.15467-RA/Caur.EVM.12351-RA/Caur.EVM.24392-RA/Caur.EVM.24720-RA/Caur.EVM.12565-RA/Caur.EVM.06131-RA/Caur.EVM.15135-RA/Caur.EVM.14803-RA/Caur.EVM.06121-RA/Caur.EVM.24313-RA/Caur.EVM.24399-RA/Caur.EVM.18646-RA/Caur.EVM.34578-RA	14
GO:0046914	MF	GO:0046914	transition metal ion binding	0.0401599	0.458493	0.437708	Caur.EVM.26540-RA/Caur.EVM.28110-RA/Caur.EVM.26790-RA/Caur.EVM.38577-RA/Caur.EVM.03649-RA/Caur.EVM.33233-RA/Caur.EVM.38263-RA/Caur.EVM.19290-RA/Caur.EVM.17493-RA/Caur.EVM.02494-RA/Caur.EVM.27570-RA/Caur.EVM.26317-RA/Caur.EVM.30414-RA/Caur.EVM.08924-RA/Caur.EVM.36758-RA/Caur.EVM.35832-RA/Caur.EVM.30558-RA/Caur.EVM.06903-RA/Caur.EVM.15340-RA/Caur.EVM.06289-RA/Caur.EVM.01210-RA/Caur.EVM.18123-RA/Cau…	61
GO:0051018	MF	GO:0051018	protein kinase A binding	0.0414518	0.463583	0.442568	Caur.EVM.24128-RA/Caur.EVM.19653-RA/Caur.EVM.37501-RA/Caur.EVM.09218-RA/Caur.EVM.19767-RA/Caur.EVM.27292-RA/Caur.EVM.13346-RA/Caur.EVM.35904-RA/Caur.EVM.36625-RA/Caur.EVM.14071-RA/Caur.EVM.25096-RA/Caur.EVM.38331-RA	12
GO:1990837	MF	GO:1990837	sequence-specific double-stranded DNA binding	0.0459451	0.503558	0.48073	Caur.EVM.36361-RA/Caur.EVM.19653-RA/Caur.EVM.23426-RA/Caur.EVM.30559-RA/Caur.EVM.08247-RA/Caur.EVM.31440-RA/Caur.EVM.36979-RA/Caur.EVM.08214-RA/Caur.EVM.03610-RA/Caur.EVM.15994-RA/Caur.EVM.15343-RA/Caur.EVM.33703-RA/Caur.EVM.32993-RA/Caur.EVM.06141-RA/Caur.EVM.30717-RA/Caur.EVM.11579-RA/Caur.EVM.03005-RA/Caur.EVM.25812-RA/Caur.EVM.11050-RA/Caur.EVM.15175-RA/Caur.EVM.05742-RA/Caur.EVM.25283-RA/Cau…	53
GO:0016616	MF	GO:0016616	oxidoreductase activity, acting on the CH-OH group of donors, NAD or NADP as acceptor	0.0484021	0.520085	0.496509	Caur.EVM.10111-RA/Caur.EVM.17389-RA/Caur.EVM.00814-RA/Caur.EVM.13327-RA/Caur.EVM.05639-RA/Caur.EVM.02072-RA/Caur.EVM.00245-RA/Caur.EVM.27840-RA/Caur.EVM.16518-RA/Caur.EVM.08219-RA/Caur.EVM.33301-RA/Caur.EVM.17246-RA/Caur.EVM.14447-RA/Caur.EVM.17767-RA/Caur.EVM.38277-RA/Caur.EVM.28755-RA/Caur.EVM.11254-RA/Caur.EVM.15443-RA/Caur.EVM.18950-RA/Caur.EVM.15604-RA/Caur.EVM.17841-RA/Caur.EVM.31426-RA/Cau…	27
